# Supplementary material for: Self-consistency test reveals systematic bias in programs for prediction change of stability upon mutation
Source: Oxford University Press journal article supplement (doi:10.1093/bioinformatics/bty340), 2018-04-30
Supplement: bioinformatics_34_21_3653_s6.doc [file bioinformatics_34_21_3653_s6.doc]

**Supplementary Table 1**

**Data statistics.**

‘Number of pairs found’, the number of pairs of protein structures found in protein data bank (PDB, [http://www.rcsb.org](http://www.rcsb.org/)) differing by one to ten amino acids substitutions (given in the first column). The pairs were obtained after applying the filtering procedure described in the Section 2.1 and following BLAST search.

‘Number of pairs selected for analysis’, the number of pairs selected randomly for the further analysis (list with the results is given in the Table S2). We chose 1000 pairs randomly if their number were greater than 1000, or took all found pairs if their number was smaller than 1000.

**Supplementary Table 2**

**List of protein pairs and predicted values of free energy change.**

The columns in the Table S2 are:

‘PDB1’, the PDB identifier of the first protein structure.

‘Chain1’, chain identifier of the first protein structure.

‘PDB2’, the PDB identifier of the protein structure.

‘Chain2’, chain identifier of the first protein structure.

‘Subst’, the substitution mutating first protein structure into the second one. If the substitution consists of several single substitutions, they are separated by semicolon.

‘N’, the number of single amino acid substitutions from first protein structure to the second one.

‘Len1’, the length of the first protein structure in amino acid residues.

‘Len2’, the length of the second protein structure in amino acid residues.

‘Res1’, the X-ray resolution of the crystal structure for the first protein.

‘Res2’, the X-ray resolution of the crystal structure for the second protein.

‘ddG1_Foldx’, free energy change for the forward substitution (from the first protein structure to the second one) predicted by FoldX. In case the value was not calculated due to technical difficulties, it is not presented.

‘ddG2_Foldx’, free energy change for the reverse substitution (from the second protein structure to the first one) predicted by FoldX. In case the value was not calculated due to technical difficulties, it is not presented.

‘ddG1_Eris’, free energy change for the forward substitution (from the first protein structure to the second one) predicted by Eris. In case the value was not calculated due to technical difficulties, it is not presented.

‘ddG2_Eris’, free energy change for the reverse substitution (from the second protein structure to the first one) predicted by Eris. In case the value was not calculated due to technical difficulties, it is not presented.

‘ddG1_Rosetta’, free energy change for the forward substitution (from the first protein structure to the second one) predicted by Rosetta. In case the value was not calculated due to technical difficulties, it is not presented.

‘ddG2_Rosetta’, free energy change for the reverse substitution (from the second protein structure to the first one) predicted by Rosetta. In case the value was not calculated due to technical difficulties, it is not presented.

‘ddG1_I-Mutant’, free energy change for the forward substitution (from the first protein structure to the second one) predicted by I-Mutant. In case the value was not calculated due to technical difficulties, it is not presented.

‘ddG2_I-Mutant’, free energy change for the reverse substitution (from the second protein structure to the first one) predicted by I-Mutant. In case the value was not calculated due to technical difficulties, it is not presented.

‘Change1_binary_I-Mutant’, the binary classification of the free energy change for the forward substitution given by I-Mutant.

‘Change2_binary_I-Mutant’, the binary classification of the free energy change for the reverse substitution given by I-Mutant.

**Supplementary Figure 3**

**The bias for single mutations for FoldX.**

The dependence of the bias for single mutations for FoldX as a function of (a) accessible surface area (ASA) of the changed position calculated as average of the amino acid residues ASA in initial and resulting protein structures; (b) difference in side chain size of the changed amino acid residues; (c) difference in charge of the changed amino acid residues; (d) difference in amino acid residue hydrophobicity (e) RMSD between protein structures in a pair, excluding position with substitution; (f) average resolution of protein structures in a pair; (g) protein length. The error bars represent three standard errors of mean in a bin. ‘spR’ and ‘p’ are Spearman correlation coefficients and the associated p-value. Spearman correlation coefficients were calculated on original not-binned data.

**Supplementary Figure 4**

Change in free energy as the function of number of relaxation rounds applied during “RepairPDB” procedure in FoldX for original protein structure. Figure insert shows the same plot but in different y-axis scale. Approximately ten rounds are required to achieve full relaxation of the structure. The dependence is shown for one randomly chosen protein structure; however, the dependence for other structures behave in the same way.

**Supplementary Figure 5**

The comparison of free energy change (**a**) and the bias (**b**) after one (x-axis) and ten (y-axis) relaxation rounds applied to original protein structure.

**Supplementary Figure 6**

Change in free energy as the function of number of relaxation rounds applied during “RepairPDB” procedure of FoldX for original protein structure (dashed line) and mutant structure (solid line). Approximately ten rounds are required to achieve full relaxation. Change of free energy was averaged over 100 randomly selected protein structures.

**Supplementary Figure 7**

The relationship between predicted changes of stability GAB and GBA for the forward and reverse mutations, where the structures A and B differ by one to ten substitutions. The columns correspond to different variations of FoldX protocol: 1) “BuildModel”, the default FoldX protocol; 2) “BuildModel & RepairPDB”, the protocol with additional relaxation after mutations; 3) “BuildModel & Modeller & RepairPDB”, the protocol with additional relaxation of mutant structure by Modeller.

The “ideal” relationship GAB + GBA = 0 is shown as a solid line (the line y = -x). Because of symmetry of the protocol, every pair of structures A and B is plotted as (A;B) and (B;A), so the plot is symmetric relative to the y = x line.
