# Supplementary material for: Self-consistency test reveals systematic bias in programs for prediction change of stability upon mutation
Source: Oxford University Press journal article supplement (doi:10.1093/bioinformatics/bty340), 2018-04-30
Supplement: bioinformatics_34_21_3653_s7.doc [file bioinformatics_34_21_3653_s7.doc]

Table S1. Data statistics

| Number of substitutions | Number of pairs found | Number of pairs selected for analysis |
| --- | --- | --- |
| 1 | 2192 | 1000 |
| 2 | 15963 | 1000 |
| 3 | 3879 | 1000 |
| 4 | 6298 | 1000 |
| 5 | 1828 | 1000 |
| 6 | 794 | 794 |
| 7 | 883 | 883 |
| 8 | 549 | 549 |
| 9 | 351 | 351 |
| 10 | 357 | 357 |
| Overall | 33094 | 7934 |
