# Supplementary material for: Self-consistency test reveals systematic bias in programs for prediction change of stability upon mutation
Source: Oxford University Press journal article supplement (doi:10.1093/bioinformatics/bty340), 2018-04-30
Supplement: bioinformatics_34_21_3653_s8.xlsx [file bioinformatics_34_21_3653_s8.xlsx]

## Sheet: Sheet1
PDB 1	Chain 1	PDB 2	Chain 2	Substitution	N	Length 1	Length 2	Resolution 1	Resolution 2	ddG1_FoldX	ddG2_FoldX	ddG1_Eris	ddG2_Eris	ddG1_Rosetta	ddG2_Rosetta	ddG1_I-Mutant	ddG2_I-Mutant	Change1_binary_I-Mutant	Change2_binary_I-Mutant
1BZJ	A	1AAX	A	C214S	1	297	297	2.25	1.9	-1.11652	2.57032				5.921	1.46	1.27	Decrease	Decrease
1GE4	A	1GE3	A	A118G	1	130	130	1.8	1.8	-1.11066	2.20011	0.236	0.158	-2.403	3.21	0.61	0.58	Decrease	Decrease
3C81	A	1LYD	A	A85K	1	164	164	1.85	2	-1.02624	1.93576	0.259	0.469	-0.112	1.297	1.44	0.59	Decrease	Decrease
1ETJ	A	4MFH	A	E121G	1	128	128	2.3	1.54	3.53161	-0.98661	-1.547	10.704	9.192	13.161	0.99	0.54	Decrease	Decrease
1LHJ	A	3FE0	A	G103P	1	130	130	1.8	1.5	-0.444572	0.648879	4.167	-1.151	9.907	0.128	0.48	1.17	Decrease	Decrease
1CJ8	A	1LZS	A	A40T	1	130	130	1.8	1.6	0.134373	-1.16586	-0.065	1.541		-0.294	1.06	1.26	Decrease	Decrease
1KCK	A	1CDG	A	G193N	1	686	686	2.43	2	0.738391	0.556243	-3.39	4.847	-1.848		0.83	1.29	Decrease	Decrease
2GKT	I	2GKR	I	A27G	1	51	51	1.23	1.16	0.74586	-0.691968					1.5	1.36	Decrease	Decrease
1B9O	A	1A4V	A	D45N	1	123	123	1.15	1.8	-0.112899	0.0534045	0.357	0.645	-0.389	0.732	-0.13	0.04	Increase	Increase
1AZI	A	1YMA	A	H64Y	1	153	153	2	2	-1.14255	1.58351	0.631	1.222		3.093	-0.4	1.33	Increase	Decrease
5CCN	A	5CCS	X	K124Q	1	164	164	1.8	2.1	0.347573	-0.198725					0.19	-0.02	Increase	Decrease
2GQX	A	1J51	A	A235L	1	405	405	2.1	2.2	0.314812	0.531855			1.621	0.766	0.24	2.42	Decrease	Decrease
2HEF	A	3FE0	A	A89I	1	130	130	1.8	1.5	-2.82056	3.15031	-2.855	5.753	3.054	4.559	-0.02	2.87	Increase	Decrease
253L	A	1QTZ	A	A20C	1	164	164	2	2	0.910127	-0.944464	-1.088	1.465	3.639	1.05	0.48	0.74	Increase	Decrease
1CH1	A	109M	A	G90L	1	154	154	1.9	1.83	-2.98394	2.82714			-4.454	5.296	0.17	2.44	Decrease	Decrease
1BRI	A	2F4Y	A	A74I	1	108	108	1.9	2.15		3.91156		4.657		5.466	0.56	3.19	Decrease	Decrease
1UGA	A	1UGD	A	F63S	1	258	258	2	2	1.04545	0.919006			6.069	0.313	1.19	-0.23	Decrease	Increase
3VM4	A	3AWP	A	F280G	1	407	407	1.94	1.8	3.00349	-2.44196			5.061	-3.361	1.94	0.58	Decrease	Decrease
3QMX	A	4MJA	A	A86I	1	99	99	1.82	2	0.238092	0.0456038			0.541	0.017	0.46	1.36	Decrease	Decrease
1ERO	A	1PZP	A	N75R	1	263	263	2.1	1.45	-0.265563	-0.281163					-0.09	0.42	Increase	Decrease
2EA4	A	5CLS	A	I238V	1	369	369	2.35	1.75	0.194065	0.248884			1.086		0.33	0.29	Decrease	Decrease
1L10	A	1L12	A	I157N	1	164	164	1.7	1.7	-0.10228	0.659078	0.02	2.285	1.114	5.848	0.92	-0.02	Decrease	Increase
1LZS	A	1CJ7	A	T11V	1	130	130	1.6	1.8	-1.01799	1.11157	0.666	0.502	-0.273		0.88	1.45	Decrease	Decrease
1OUG	A	1GFG	A	A2R	1	130	130	1.8	1.8	-0.884451	0.92314	1.2	1.157	-0.13	1.629	0.17	0.25	Decrease	Decrease
3ONS	A	5NL4	A	E16V	1	72	72	1.8	1.32	0.0693581	-0.101815	-2.832	-0.488	-0.006	1.32
4AVD	A	4F6G	A	H101W	1	110	110	1.5	1.64	-0.937073	1.90059			-1.603	5.78	0.26	1.08	Decrease	Decrease
1TG3	A	5E2S	A	H60N	1	258	258	1.8	1.5	0.724137	1.74821			1.794		0.29	0.47	Increase	Decrease
1LV0	A	1D5T	A	E373G	1	433	433	2	1.04	-0.504048				-0.145	0.2	1.22	0.91	Decrease	Decrease
1FVX	A	1FLD	A	N57T	1	138	138	1.9	1.8	0.244772	0.372159	-0.041	0.662	-0.732	1.283	-0.14	0.08	Increase	Increase
1CRN	A	1AB1	A	P22S	1	46	46	1.5	0.89	1.39678	-0.955907	-0.538	0.384	2.626	-1.965	1.13	0.04	Decrease	Increase
2HEC	A	1LOZ	A	A56T	1	130	130	1.8	1.8	0.597616	0.363247	2.221	-0.224	3.486	1.005	0.86	1.23	Decrease	Decrease
1S51	A	1S52	A	S20V	1	227	227	2	2.3	0.272048	0.497421			0.378	2.218	-0.58	1.58	Increase	Decrease
4JS6	A	5BNL	A	D91H	1	257	257	1.55	2	5.77209	10.3884			-1.174		0.45	0.72	Decrease	Increase
5EE8	A	4FCF	A	K209R	1	265	265	1.54	1.09	3.77121	-2.14581					1.09	1.51	Decrease	Decrease
102M	A	2MGC	A	A65L	1	154	154	1.84	1.9	-1.3938	2.24519			0.699	4.631	0.39	2.29	Decrease	Decrease
2YYW	A	2EWI	A	M20Y	1	107	107	1.33	1	0.592006	-0.0817807	-1.342	0.101	-1.485	6.442	1.19	0.85	Decrease	Decrease
1OUH	A	1GB7	A	A74L	1	130	130	1.8	1.8	-0.633051	0.790647	-1.163	1.477	-0.578	1.678	0.33	1.38	Decrease	Decrease
1SF3	A	1AAJ	A	A94P	1	105	105	1.05	1.8	0.214277	1.939	6.54	-2.251	0.921	2.64	0.24	0.89	Increase	Decrease
1CO9	A	1CPW	A	V105W	1	154	154	1.6	2.2	-1.21356	2.31673					0.84	0.86	Decrease	Decrease
1O6F	A	4AMY	A	A641D	1	710	710	1.6	2	2.38512	1.84507	2.686	1.422	9.407	0.587	1.09	0.85	Decrease	Decrease
5B3K	A	5B3L	A	A101S	1	150	150	1.7	1.8	1.5233	-0.878549	2.18	-1.848
102M	A	1MOC	A	A65T	1	154	154	1.84	2	0.0349949	-0.136079			0.089	-0.496	0.76	1.27	Decrease	Decrease
1D9Y	A	1R1N	A	C32S	1	309	309	2.2	1.74	-0.0380366	-0.300255	1.232	-0.532		-0.433	0.46	-0.11	Decrease	Increase
1LHI	A	3FE0	A	G71P	1	130	130	1.8	1.5	7.80131	1.51645	10.409	0.766	108.806	3.084	0.68	1.94	Decrease	Decrease
1FQF	A	1A8E	A	A294K	1	329	329	2.1	1.6	0.444396	-3.15403					1.23	1.03	Decrease	Decrease
1IP5	A	3FE0	A	A105G	1	130	130	1.8	1.5	-2.02757	3.17577	0.344	-0.403	-0.577	2.5	1.2	1.22	Decrease	Decrease
1QTZ	A	219L	A	C20D	1	164	164	2	1.66	-2.37693	2.74404	-3.076	3.653	-0.442	1.495	0.56	0.18	Increase	Increase
1C9V	A	3A1R	A	A12H	1	124	124	1.7	1.7	0.0233203	1.68005	-1.104	5.911	-1.384	4.781	1.6	1.37	Decrease	Decrease
3P75	A	3BDC	A	D92V	1	129	129	1.9	1.8					0.314	8.974	-0.06	1.57	Decrease	Decrease
1LOW	A	2AAD	A	A40K	1	104	104	1.9	2	-0.387904	0.784472	3.077	-1.208	-0.032	-0.355	0.76	1.06	Decrease	Decrease
1OWD	A	1OWE	A	N144Q	1	245	245	2.32	1.6
1BB3	A	1B7M	A	L96M	1	130	130	1.8	2.2	0.48082	0.738742	2.972	0.565	4.289	-2.45	1	0.83	Decrease	Decrease
5CS7	A	4RMS	A	D54N	1	100	100	2.1	1.7	-0.00251754	-0.0835437					0.78	0.95	Decrease	Decrease
3FE0	A	2MEB	A	I56L	1	130	130	1.5	1.8	-0.14016	0.884013	1.042	2.773	2.135	3.609	0.52	0.56	Decrease	Decrease
1WQP	A	3FE0	A	F45Y	1	130	130	1.8	1.5	0.299718	-0.0217483	-1.656	1.932	0.321	0.155	0.62	0.35	Decrease	Increase
1GFU	A	3FE0	A	D110V	1	130	130	1.8	1.5	1.41512	-1.41465	-1.698	1.28	1.398	1.728	-0.19	0.35	Increase	Increase
1C6L	A	2B6T	A	A153F	1	162	162	1.9	2.1	0.455456	4.38155	16.829	3.259		7.556	0.63	2.61	Decrease	Decrease
1FN5	A	193L	A	A49G	1	129	129	1.78	1.33	-2.66207	3.03641	-0.778	-1.387	-3.053	6.27	1.36	1.31	Decrease	Decrease
1HQ2	A	1DY3	A	A82R	1	158	158	1.25	2	1.97608	-0.319781	3.944	-0.764	3.6		0.53	1.35	Decrease	Decrease
1BCX	A	3VZJ	A	C172H	1	185	185	1.81	2.41	-0.303162	-0.316293	0.348	1.531		0.907	0.86	0.78	Decrease	Increase
4RMW	A	5CS7	A	A77D	1	100	100	1.4	2.1	-0.210827	0.433189					0.71	0.38	Decrease	Decrease
1L28	A	1L31	A	G86R	1	164	164	1.9	1.8	-0.54241	0.772041	-3	3.366	0.061	1.211	0.8	1.21	Decrease	Decrease
1L01	A	1L10	A	A155T	1	164	164	1.7	1.7	0.0472156	-0.755902	-1.106	1.94	2.571	-1.144	0.86	1.26	Decrease	Decrease
1JGI	A	1MVY	A	D537G	1	628	628	2	2	-0.0540402	1.43621	1.828	-0.125		5.054	0.97	1.55	Decrease	Decrease
2FAX	A	2FOX	A	A137N	1	138	138	1.8	1.8	-0.101141	0.726879	0.769	-0.416	0.115	1.718	0.91	0.21	Decrease	Decrease
1E2W	A	1EWH	A	F168N	1	251	251	1.6	2.35	3.40187	1.75979	-27.236	5.956	6.508	-2.373	1.53	0.25	Decrease	Increase
1L12	A	1L13	A	N157R	1	164	164	1.7	1.7	0.164135	-0.523846	3.354	0.229	2.361	-0.365	0.38	0.73	Decrease	Decrease
2MED	A	3FE0	A	F59I	1	130	130	1.8	1.5	3.73723	5.59705	4.397	5.909	10.426	7.146	0.42	1.54	Decrease	Decrease
1LZS	A	1EQ4	A	E7Q	1	130	130	1.6	1.8	0.195625	0.363477	2.462	-0.852	0.066		0.86	0.99	Decrease	Decrease
1L10	A	1L15	A	I157V	1	164	164	1.7	1.7	-0.0215873	0.165411	-0.861	0.248	-0.061	2.817	0.44	0.6	Decrease	Decrease
2EXV	A	351C	A	A7F	1	82	82	1.86	1.6	6.96838	2.8171	1.076	3.579	1.629	8.494	0.58	1.96	Decrease	Decrease
3CDV	A	1LYD	A	M96R	1	164	164	1.73	2	-1.01139	0.988085	-1.477	0.916	1.003	2.694	1.63	0.75	Decrease	Decrease
4TWV	A	1NZ3	A	E96K	1	153	153	1.06	1.6	-0.284514	1.00195	1.019	-2.343		4.273	0.69	0.17	Decrease	Increase
1E8M	A	4AMY	A	A554S	1	710	710	1.5	2	0.714711	-0.00842868	3.501	-2.112			0.54	0.67	Decrease	Decrease
1GB7	A	3FE0	A	L74V	1	130	130	1.8	1.5	0.245271	-0.833375	2.141	0.198	2.003	3.203	0.82	0.49	Decrease	Decrease
1MLF	A	109M	A	A69V	1	154	154	2	1.83	-0.135939	0.146333			-1.998	2.179	-0.3	0.94	Increase	Decrease
1QOG	A	1CZP	A	A47S	1	98	98	1.8	1.17	1.18354	-0.489347	-0.115	-1.018	4.174	0.276	0.71	0.93	Decrease	Decrease
1L04	A	1L15	A	D157V	1	164	164	1.7	1.7	1.64235	-0.295655	-0.42	1.795	-1.295	3.04	0.21	1.38	Decrease	Decrease
1HJ8	A	1UTJ	A	A9P	1	222	222	1	1.83	-0.83444	1.70363
3FE0	A	1LYY	A	D67H	1	130	130	1.5	1.8	3.0147	-0.695902	7.524	-1.551	8.602	0.22	0.88	0.61	Decrease	Decrease
1L04	A	1L07	A	D157F	1	164	164	1.7	1.7	0.913805	0.0141295	4.035	-2.385	-3.237	3.105	-0.18	1.3	Decrease	Decrease
1SFD	A	1AAJ	A	F94P	1	105	105	0.99	1.8	2.14886	1.17914	5.182	0.315	10.186	9.794	1.07	0.6	Decrease	Decrease
1L97	A	1L17	A	P3V	1	164	164	2	1.7	0.951246	0.364329	-5.403	3.557	5.97	3.435	0.58	2.09	Decrease	Decrease
4IXF	X	4IXG	X	K37S	1	206	206	1.7	1.7	0.172358	-0.215107	-1.343	1.235	2.273	-0.696	0.99	1.1	Decrease	Decrease
1AW7	A	2QIL	A	A136Q	1	194	194	1.95	2.07	1.79368	1.93023	3.609	1.801	3.343	2.716	1.09	1.24	Decrease	Decrease
1EIC	A	1EIE	A	A120W	1	124	124	1.4	1.4	-0.939429	3.92994	1.516	2.88	3.434		0.83	1.88	Decrease	Decrease
2EIB	A	2EIE	A	H290W	1	639	639	2.1	1.8	-1.24213	2.25852	6.965	-6.848	0.979	3.198	0.23	0.94	Increase	Decrease
1HZ1	A	1FYS	A	A16C	1	104	104	1.8	2	0.558801	0.377756	0.094	1.115	5.949	0.244	1.09	1.67	Decrease	Decrease
2RGB	A	4EFN	A	K61L	1	166	166	1.35	2.3	-1.04205	0.878063	-1.897	4.867			-0.18	1.62	Increase	Decrease
1CH7	A	1CH5	A	F98V	1	154	154	1.9	2.1	1.11649	0.674081			6.882		0.97	1.07	Decrease	Decrease
1T2H	A	1LNI	A	W81Y	1	96	96	1	1	1.39662	1.43015	-3.892	6.618	1.115	1.971	0.9	0.92	Decrease	Decrease
1CZP	A	1QOA	A	C49S	1	98	98	1.17	1.7	0.826445	-1.10571	0.389	-1.774	0.415	2.817	0.89	0.36	Decrease	Decrease
1GB9	A	1GB8	A	F74M	1	130	130	1.8	1.8	0.63155	-0.248634	-3.06	2.447		-0.797	0.4	0.15	Increase	Decrease
4KOC	A	4KOB	A	F108Y	1	128	128	1.46	1.87	-0.0139867	0.300054	-2.538	3.233	0.688	1.296	0.57	0.69	Decrease	Decrease
4YEO	A	3QY4	A	R73S	1	129	129	0.98	1.65	1.51819	0.060847	3.641	0.141		0.893	0.68	0.6	Decrease	Decrease
1OUG	A	1GB2	A	A2M	1	130	130	1.8	1.8	0.304043	0.149405	-2.111	2.901	-0.99	1.317	0.15	0.52	Decrease	Decrease
4DM1	A	3AXX	A	K256R	1	377	377	1.75	1.9	-3.22118	-0.0440722					1.14	1.31	Decrease	Decrease
1PQD	A	1P37	A	L102M	1	164	164	1.65	1.57	-0.0134158	-0.0157808	-2.184	3.574		1.536	1.04	0.82	Decrease	Decrease
2AG9	A	2AG2	A	S139Y	1	164	164	2.2	2	4.86752	2.84719	19.275	7.123	-0.29	10.46	0.54	1.74	Decrease	Decrease
1BNS	A	2F4Y	A	A24T	1	108	108	2.05	2.15	1.01305	0.0130398		3.367	0.21	-0.511	0.82	1.69	Decrease	Decrease
3A2G	A	1UFP	A	C103K	1	154	154	1.75	2.1	-1.17312	1.19168			-0.829	0.704	0.79	0.58	Decrease	Decrease
1GB9	A	1GB6	A	F74I	1	130	130	1.8	1.8	1.11705	-1.07718	0.564	2.383		0.196	0.58	0.56	Increase	Decrease
2RGA	A	1CTQ	A	I61Q	1	166	166	1.9	1.26	1.47961	-0.326451	2.626	-2.949			1.01	-0.38	Decrease	Increase
1DKJ	A	1HEP	A	K68R	1	129	129	2	1.8	-0.437688	0.915752	-2.171	3.786		0.847	0.61	0.6	Decrease	Decrease
1RGC	A	2AAD	A	H40K	1	104	104	2	2	-0.747071	1.06825	2.504	0.301	2.492	-0.135	0.61	0.97	Decrease	Decrease
4XPV	A	4XQW	A	D43E	1	189	189	1.7	1.5	-1.21626	1.71925					0.77	0.32	Increase	Decrease
4QDM	A	2FGL	A	L1V	1	354	354	1.96	2.2	-0.0583905	-0.238687	-0.802	0.834	0.005	0.04	0.4	0.49	Decrease	Decrease
1YPA	I	1YPB	I	A12G	1	64	64	2	2	0.0410293	0.171269			1.017	-0.208	1.53	0.99	Decrease	Decrease
1IOW	A	2DLN	A	F216Y	1	306	306	1.9	2.3	-0.550041	0.37099	-4.818	-0.32	-0.583	1.598	1	1.21	Decrease	Decrease
1CJ6	A	1CJ7	A	A11V	1	130	130	1.8	1.8	-1.12902	1.04089	-1.832	2.38			0.52	1.53	Decrease	Decrease
3FA6	A	3CWK	A	D121E	1	137	137	1.54	1.6	-1.042	1.87683	-1.83	2.917	-0.62	2.156	0.98	0.95	Decrease	Decrease
3LAH	A	5JRV	A	G102H	1	188	188	2	1.95	-3.13254	2.40436	-4.682	4.94	-1.708		1.25	1.34	Decrease	Decrease
2QAJ	A	2EU8	A	E213G	1	216	216	1.8	1.8	-0.447957	0.448776	1.76	-0.912	3.744	-0.321	1.38	1.04	Decrease	Decrease
1GB3	A	3FE0	A	F2V	1	130	130	1.8	1.5	0.0576707	0.0878257	-3.655	5.691	0.719	1.595	0.76	1.05	Decrease	Decrease
1GBO	A	1INU	A	G110R	1	130	130	1.8	1.8	-0.772865	0.926109	-0.891	0.608	1.124	-1.708	0.29	0.1	Increase	Increase
4C66	A	5I80	A	M2T	1	126	126	1.87	1.45	-0.332591	0.106901			-0.128		0.49	0.33	Decrease	Decrease
1EID	A	1EIE	A	G120W	1	124	124	1.4	1.4	2.99708	4.97163	2.681	4.903	9.246		0.99	2.14	Decrease	Decrease
1RBS	A	1RBR	A	A62P	1	155	155	1.8	1.8	-1.0688	0.704118	2.797	-1.711	-1.998	2.299	0.2	1.02	Decrease	Decrease
1CH2	A	1CH1	A	F90G	1	154	154	1.8	1.9	3.37731	-2.3634				-4.252	1.89	0.38	Decrease	Decrease
1LQX	A	1LR6	A	E43Y	1	82	82	1.8	1.9	-0.674868	2.05684			4.093	7.262	-0.29	0.19	Increase	Decrease
1YPB	I	1YPC	I	G12S	1	64	64	2	1.7	-0.183831	0.905991			-1.477	2.071	1.54	0.89	Decrease	Decrease
3FE0	A	1LOZ	A	I56T	1	130	130	1.5	1.8	3.66768	-2.22704	7.078	-4.247	7.098	-0.592	2.68	-0.29	Decrease	Increase
5MGH	A	3CMQ	A	A39P	1	405	405	1.87	2.2	-1.17955	3.069				5.372
3PXL	A	3FPX	A	A316S	1	499	499	1.2	1.8	-0.0923983	0.488585	1.879	-1.138	3.265	-1.184	0.92	1.08	Decrease	Decrease
3C7Y	A	3C7W	A	A96K	1	164	164	1.95	1.77	-0.956509	0.94837	3.431	-1.084	2.318	1.129	1.76	1.16	Decrease	Decrease
1AME	A	1MSJ	A	T16V	1	66	66	1.65	2.3	0.146472	-0.17244			-0.439	1.811	0.43	1.72	Decrease	Decrease
1G0P	A	219L	A	G149V	1	164	164	1.8	1.66	-3.81062	3.75086	-9.066	10.427	-4.54	5.935	0.24	2.89	Decrease	Decrease
1ETN	A	1ETM	A	A8L	1	12	12	0.89	0.89	-0.202352	0.578914			-0.183	0.763
1OUH	A	1GFR	A	A74R	1	130	130	1.8	1.8	-0.314045	0.163268	-0.364	-0.024	0.566	0.96	0.33	0.25	Decrease	Decrease
1L14	A	1L15	A	S157V	1	164	164	1.7	1.7	-0.199251	0.225973	0.79	2.744	1.292	-0.113	0.35	1.41	Decrease	Decrease
3HC9	A	1YMA	A	V64Y	1	153	153	2	2	0.727157	0.946858	0.811	-0.493	3.14	1.909	1.12	0.37	Decrease	Decrease
1L06	A	1L08	A	E157G	1	164	164	1.7	1.7	0.340176	-0.402312	0.463	-0.42	-1.151	1.672	0.97	1.12	Decrease	Decrease
1GFR	A	1GFH	A	R74Y	1	130	130	1.8	1.8	-0.0301349	0.567539	-0.553	0.461	0.332	2.039	0.26	0.44	Decrease	Decrease
1CO8	A	109M	A	A105L	1	154	154	1.8	1.83	-2.24899	2.30167				5.726	0.43	2.76	Decrease	Decrease
1GB0	A	3FE0	A	L2V	1	130	130	1.8	1.5	0.17474	-0.285416	-0.841	2.436		2.284	0.86	0.6	Decrease	Decrease
2C2S	A	1HFQ	A	F31S	1	186	186	1.4	2.1	0.801491	-1.03708	0.619	-1.83	2.879	-2.228	1.46	-0.29	Decrease	Increase
1IZR	A	3A1R	A	A46F	1	124	124	1.5	1.7	0.370477	4.33864	0.04	7.419	-1.475	9.185	0.95	3	Decrease	Decrease
1UGB	A	1UGF	A	G63T	1	258	258	2	2	2.9702	-1.36014			1.464	7.144	0.48	1.21	Decrease	Decrease
1FLA	A	2FOX	A	D57G	1	138	138	1.9	1.8	-0.892173	3.30965	0.459	0.998	-0.987	2.489	0.03	0.6	Increase	Decrease
1OUB	A	1GF7	A	A100T	1	130	130	1.8	1.8	1.77116	1.02063	2.057	0.669	6.109	-0.571	0.86	1.32	Decrease	Decrease
3X2G	A	3X2L	A	D92N	1	180	180	1	0.83	0.108434	1.7383	-0.863	3.205	-1.503	5.884	0.18	0.21	Increase	Decrease
1BZ4	A	1GS9	A	C91R	1	144	144	1.85	1.7	0.667271	0.663255			3.863	2.387	1.11	1.31	Decrease	Decrease
2RGB	A	2RGC	A	K61V	1	166	166	1.35	1.6	0.352382	-0.0167713	-1.965	5.511			-0.17	1.14	Increase	Decrease
1UCI	A	1LNI	A	T2V	1	96	96	1.8	1	-0.803151	1.38148	-1.457	3.856	0.831	2.73	0.53	1.54	Decrease	Decrease
2HEC	A	2MEA	A	A56F	1	130	130	1.8	2.2	4.10118	4.68275	11.923	-0.538	0.139	8.122	0.21	1.66	Decrease	Decrease
1L16	A	1LYD	A	D156G	1	164	164	1.7	2	-3.58969	8.28744	-1.949	1.267	-3.792	13.652	1.08	1.4	Decrease	Decrease
2QCY	A	2H2Z	A	A298R	1	306	306	1.75	1.6	-0.402443	1.4779	1.062	0.456	2.963	0.97	0.62	0.69	Decrease	Decrease
5C9M	A	5DF5	A	A28E	1	104	104	1.36	1.3	-0.215358	-0.0845781	1.084	-1.467			0.53	0.5	Decrease	Decrease
2C2S	A	1U71	A	L22R	1	186	186	1.4	2.2	-0.823531	-0.284444	2.489	-2.625	5.09	-4.064	1.36	0.51	Decrease	Decrease
2BEN	A	2BEM	A	A27Y	1	170	170	1.8	1.55	-0.333646	0.699462					0.33	0.81	Decrease	Decrease
1GF8	A	3FE0	A	S2V	1	130	130	1.8	1.5	-0.452064	0.622435	-4.981	5.066	-1.78	2.821	-0.13	1.24	Increase	Decrease
3HPR	A	1AKE	A	G148V	1	214	214	2	2	0.241968	0.697109	-2.9	3.371	-1.304	1.508	0.64	1.67	Decrease	Decrease
5EET	A	4MU5	A	M142W	1	148	148	2	1.8	9.84881	0.553191				5.542	1.43	1.05	Decrease	Decrease
7PTI	A	1AAL	A	A30V	1	58	58	1.6	1.6	0.409806	1.92274	-1.599	2.411	4.681	4.556	0.02	1.12	Increase	Decrease
1DJ1	A	7CCP	A	A45L	1	291	291	1.93	2.2	-1.36844	0.67302					0.06	1.57	Decrease	Decrease
3BDZ	A	1T2B	A	A235N	1	397	397	2	1.7	0.938746	-0.0378592			3.066	0.218	1.16	0.51	Decrease	Increase
5E2S	A	3DVB	A	N60V	1	258	258	1.5	1.7	2.28283	0.348735				-0.961	-0.44	1.13	Increase	Decrease
4MFH	A	1E67	A	G121M	1	128	128	1.54	2.14	2.11759	1.9138	7.632	1.65	13.913	5.656	-0.09	1.89	Increase	Decrease
1L99	A	1LYD	A	G105Q	1	164	164	1.95	2	-0.838263	1.6154	-1.042	1.416	-2.47	2.224	0.53	1.81	Decrease	Decrease
1CP0	A	1CPW	A	N105W	1	154	154	2	2.2	-1.97523	2.90807					-0.16	1.85	Decrease	Decrease
2VCS	A	5JQR	A	A41H	1	249	249	1.68	1.81	2.13725	0.865159			4.803
1GVD	A	1GV5	A	L14V	1	52	52	1.45	1.58	1.66537	-0.842112			4.452	-0.583	1.33	0.46	Decrease	Increase
1UCJ	A	1LNI	A	T36V	1	96	96	1.81	1	-0.422744	0.86794	-2.714	1.852	0.933	1.546	0.45	1.55	Decrease	Decrease
2B46	X	2B45	X	S147T	1	185	185	2.21	2	0.527484	0.0574896	0.467	1.093	0.519	0.172	0.34	0.92	Increase	Decrease
2GKE	A	2Q9H	A	C73S	1	274	274	1.35	2.3	0.0504948	-1.15315	3.523	-3.476	-0.082	-0.237	0.74	0.51	Decrease	Decrease
1FP8	A	1CWY	A	Q27R	1	500	500	2.3	2	0.968988	0.00704874	-0.226	-2.297	5.946	-1.316	0.22	0.48	Decrease	Decrease
1L08	A	1L11	A	G157L	1	164	164	1.7	1.7	0.828417	0.738278	-1.837	2.183	0.16	1.831	0.63	2.04	Decrease	Decrease
1OUC	A	1GBO	A	A110G	1	130	130	1.8	1.8	-0.0363492	-0.513901	2.268	-2.228	0.751	-0.577	0.57	0.59	Decrease	Decrease
4QEF	A	5BNL	A	I203V	1	257	257	1.47	2					0.548		0.77	0.47	Decrease	Decrease
1LHH	A	1INU	A	P110R	1	130	130	1.8	1.8	2.02387	-1.39862	-1.119	2.537		-2.345	0.3	-0.12	Increase	Increase
2HED	A	2MED	A	A59F	1	130	130	1.8	1.8	-2.02888	4.62853	-3.428	6.361	-2.141	10.711	0.59	1.78	Decrease	Decrease
1DTI	A	109M	A	D98H	1	154	154	1.7	1.83	0.196782	-0.260662				6.545	0.5	0.46	Decrease	Decrease
1L30	A	1L31	A	L86R	1	164	164	1.7	1.8	0.0727991	-0.198248	0.901	0.188	1.224	-0.717	1.43	0.24	Decrease	Decrease
1AAJ	A	4P5R	A	W45Y	1	105	105	1.8	1.09	2.77663	-1.37895	-0.352	1.915	5.328	-1.702	1.33	1.38	Decrease	Decrease
2MEH	A	2MEI	A	T59Y	1	130	130	1.8	1.8	8.95999	5.17265	9.589	7.813	10.237	10.605	0.7	1.49	Decrease	Decrease
3FE0	A	1GF3	A	A92S	1	130	130	1.5	1.8	0.445233	-0.463987	4.81	-4.721	2.486		1.02	1.09	Decrease	Decrease
1ETL	A	1ETM	A	G8L	1	12	12	0.89	0.89	-0.535246	0.718792			-0.589	1.119
1PC4	A	1AXQ	A	A50P	1	106	106	1.65	2.1	-1.66469	2.04292	2.421	-2.001	-1.922		0.25	1.38	Increase	Decrease
5I79	A	5I77	A	A237E	1	302	302	2.35	1.8	3.88942	1.1113
2AT5	X	1SXU	A	D30N	1	184	184	1.22	1.4	-5.14679	1.80937	-3.608	1.352	0.116	5.603	0.72	1.02	Decrease	Decrease
3V8I	A	5GII	A	E27N	1	210	210	1.8	1.29	2.04487	-1.39758			0.552
1F9I	A	4B9O	A	F42Y	1	125	125	1.1	1.6	0.905852	0.709792	1.393	5.322	3.093	1.064	0.78	0.87	Decrease	Decrease
1G0P	A	1G0Q	A	G149I	1	164	164	1.8	1.8	-4.5584	4.98516	-7.613	8.347	-0.242		-0.19	3.24	Increase	Decrease
3HSJ	A	1DY3	A	A55N	1	158	158	1.18	2	3.74906	0.202612	0.774	1.555	6.38		1.69	1.65	Decrease	Decrease
2FFN	A	2EWU	A	F20H	1	107	107	1.8	1.1	1.89347	-1.75645	0.51	-0.68	3.418	0.504	1.84	0.52	Decrease	Decrease
1C74	A	2B96	A	K121M	1	123	123	1.9	1.7	0.10757	-0.265867	-2.459	3.479		-0.392	0.18	0.37	Increase	Increase
5JMZ	A	4ZX1	A	E210Q	1	257	257	1.9	1.5
3M5Q	A	1MN1	A	D179N	1	357	357	0.93	2	4.60285	0.593264	-1.993	1.383	6.377		0.42	0.81	Decrease	Decrease
3FGZ	A	3FFT	A	M58N	1	128	128	2	2.21	0.0322322	0.987368			1.574	0.101	0.74	-0.19	Decrease	Increase
1Q36	A	2AA9	A	A313D	1	427	427	1.6	1.5	-2.58972	1.93404	2.477	-0.454	3.45	0.786	1.22	1.35	Decrease	Decrease
1L09	A	1L11	A	H157L	1	164	164	1.7	1.7	0.27682	0.489129	0.139	0.777	3.083	1.49	-0.01	1.55	Increase	Decrease
7AME	A	2SPG	A	A16S	1	66	66	1.7	1.75	0.38001	0.131796			0.419	-1.1	1.41	0.55	Decrease	Decrease
3NML	A	1MGN	A	W65Y	1	154	154	1.68	1.9	-0.412398	-0.592371			0.648	4.436	0.76	0.65	Decrease	Decrease
4CBN	A	5FBE	A	A202R	1	228	228	1.8	1.43	-0.0911157		1.949		0.515
2MGJ	A	1MGN	A	V65Y	1	154	154	2	1.9	0.775532	0.704184			-0.525	5.872	1.4	0.45	Decrease	Decrease
1BU4	A	1RGK	A	E46Q	1	104	104	1.9	1.87	0.301717	0.538554	-1.242	0.895		3.731	0.41	0.26	Decrease	Increase
3C8S	A	3CDQ	A	E96S	1	164	164	1.68	1.68	-0.147812	3.14338	1.267	2.025	3.153	1.929	1.33	0.94	Decrease	Decrease
1VD5	A	2AHF	A	D88N	1	377	377	1.8	1.52	0.642093	0.572066	-1.413	3.367	-4.149	5.342	1.02	0.94	Decrease	Decrease
1FZU	A	1I3I	A	A78T	1	104	104	1.8	1.76	-0.837398	0.894774	-1.205	1.658	0.241	1.905	0.94	1.52	Decrease	Decrease
2B91	A	2B8X	A	A85R	1	129	129	2	1.7	-0.678556	0.499461	-1.1	0.322	1.236	-2.939	0.54	0.95	Decrease	Decrease
3DR9	A	3KUO	A	C73S	1	137	137	1.26	1.26	1.69144	-1.05633				0.981	1.08	0.94	Decrease	Decrease
3OJP	A	1LSY	A	N52S	1	129	129	1.81	1.9	1.73509	-1.2153	4.599	-0.997	3.791	-1.331	0.53	1.09	Decrease	Decrease
3BMV	A	1CIU	A	P77S	1	683	683	1.6	2.3	2.56513	3.04552	2.098	11.756	6.483	11.119	1.42	1.25	Decrease	Decrease
1FLU	A	193L	A	A67G	1	129	129	1.78	1.33	-1.73016	2.37866	0.068	0.675	-1.824	2.185	1	0.99	Decrease	Decrease
1F2M	A	1KAA	A	A109V	1	136	136	2	1.9	0.156181	1.22573				0.207	0.13	1.63	Decrease	Decrease
1B7S	A	1GFH	A	S74Y	1	130	130	2	1.8	-0.0565464	1.07232	-1.974	2.518		2.691	0.46	0.65	Increase	Decrease
1QH0	A	1QGZ	A	D68L	1	295	295	1.93	2.3	-0.650212	1.98132			1.482	6.772	0.83	1.65	Decrease	Decrease
3RJN	B	4TWU	A	E85K	1	153	153	1.9	1.08	-0.49429	-0.2049	0.993	-1.568	-2.552		0.46	0.18	Decrease	Increase
3FE0	A	1LHL	A	A47P	1	130	130	1.5	1.8	-0.998347	2.00466	3.243	-2.183	-1.95	0.898	0.14	1	Increase	Decrease
5EE8	A	1N9B	A	G213S	1	265	265	1.54	0.9	4.36925	0.742865					0.41	1.23	Decrease	Decrease
1L27	A	1L31	A	D86R	1	164	164	1.8	1.8	-1.06548	0.0120875	-1.729	2.525		1.443	0.38	0.76	Decrease	Decrease
1MN1	A	1MN2	A	E35Q	1	357	357	2	2	-0.131257	0.226702	-1.134	0.508		4.691	0.7	0.53	Decrease	Decrease
1GB6	A	3FE0	A	I74V	1	130	130	1.8	1.5	0.401247	-0.438226	1.316	-0.211	0.58	0.828	0.32	0.28	Decrease	Decrease
1THV	A	5A47	A	D113N	1	207	207	1.75	1.2	0.0524617	-0.600961	-0.641	1.479	2.884		1.55	1.66	Decrease	Decrease
3UNS	A	3UQV	A	A172S	1	223	223	1.8	2.4
3HAP	A	4Y9H	A	A106L	1	226	226	1.6	1.43	-3.75699	4.05322			8.37		0.02	2.1	Decrease	Decrease
109M	A	2OH9	A	V69W	1	154	154	1.83	1.8	-3.17607	4.31957			-4.039	2.034	0.73	0.65	Decrease	Decrease
1FYS	A	1G02	A	C16S	1	104	104	2	1.86	1.02273	0.251771	2.524	-2.607	1.295		1.43	0.95	Decrease	Decrease
1G02	A	1BU4	A	S16V	1	104	104	1.86	1.9	-1.67955	2.86097	-5.351	7.594			0.37	1.93	Decrease	Decrease
2BVV	A	1BVV	A	F69Y	1	185	185	1.5	1.8	-0.320863	1.00158	-0.642	6.422	-1.025	4.193	0.63	0.73	Decrease	Decrease
1NTF	A	4L1Y	A	A19V	1	280	280	1.8	1.55	-1.00993	1.68477			0.852	2.722	-0.22	1.69	Increase	Decrease
4DM2	A	4DM1	A	C41P	1	377	377	1.95	1.75	2.84999	1.61876					0.19	0.93	Increase	Decrease
2I1B	A	1TOO	A	F146W	1	153	153	2	2.1	1.81488	1.60242	7.212	-2.098	4.036	4.303	1.28	1.42	Decrease	Decrease
1GFA	A	1GB2	A	D2M	1	130	130	1.8	1.8	-0.202356	-0.0384261	-2.787	2.35	-2.746	5.207	-0.21	0.36	Increase	Increase
4HOH	A	1BU4	A	A93T	1	104	104	2.05	1.9	0.319434	-0.308719	0.957	-1.192	1.36		0.5	0.58	Decrease	Decrease
5CS7	A	4RMT	A	D99N	1	100	100	2.1	1.24	-0.511241	0.116797					0.43	-0.03	Increase	Increase
5E2S	A	4QK2	A	E231P	1	258	258	1.5	1.52						3.291	-0.08	0.8	Increase	Decrease
1CO8	A	1CPW	A	A105W	1	154	154	1.8	2.2	-2.2403	2.95776					0.55	1.79	Decrease	Decrease
102M	A	109M	A	A65H	1	154	154	1.84	1.83	-0.552313	0.324727			-1.134	-0.926	1.27	0.43	Decrease	Decrease
1GAY	A	1GFE	A	G2N	1	130	130	1.8	1.8	-0.568137	1.77699	-2.576	3.53	-1.466	1.523	0.9	0.69	Decrease	Decrease
3C8S	A	3FI5	A	E96W	1	164	164	1.68	1.53	7.95132	2.32148	29.375	-3.645	3.813	7.64	0.56	1.88	Decrease	Decrease
1QUI	A	1QUL	A	G137T	1	321	321	1.9	1.7	2.7796	0.066908	0.249	2.626	1.706	1.115	0.61	1.18	Increase	Decrease
1GFR	A	3FE0	A	R74V	1	130	130	1.8	1.5	0.237502	-0.307421	-0.863	2.209	0.55	2.158	0.17	0.58	Decrease	Decrease
1H4H	A	1H4G	B	A93E	1	206	206	1.9	1.1	6.97714	2.60581	16.319	-6.39	-1.376	6.06
1MLF	A	2OH9	A	A69W	1	154	154	2	1.8	-3.03435	4.82151			-6.681	4.076	0.16	1.27	Decrease	Decrease
1AIM	A	1EWP	A	A159Q	1	215	215	2	1.75
5E2S	A	1UGC	A	A63H	1	258	258	1.5	2	1.93157	0.755146				6.616	0.73	0.36	Decrease	Decrease
1GFU	A	1GBY	A	D110M	1	130	130	1.8	1.8	1.79449	-0.608734	-2.067	1.21	0.386	0.978	-0.41	0	Increase	Increase
1OQH	A	1A8E	A	A122R	1	329	329	2.4	1.6	-0.0662751	0.489264					0.51	1.06	Decrease	Decrease
3MSI	A	2MSI	A	H17M	1	66	66	1.43	1.9	-0.141962	0.116904			1.034	1.169	-0.07	1.2	Increase	Decrease
1LZG	A	193L	A	F62W	1	129	129	1.8	1.33	-0.165307	-0.412987	4.71	-4.596	2.378	0.129	1.19	1.06	Decrease	Decrease
5M9V	A	5EOP	A	C120R	1	121	121	1.7	1.35	-0.530817	1.01977
1L13	A	1L15	A	R157V	1	164	164	1.7	1.7	-0.159307	-0.477037	-0.498	1.549	-1.273	1.193	0.47	1.03	Decrease	Decrease
2DG4	A	2DG9	A	F59L	1	107	107	1.7	1.7	1.75092	-0.132903	0.301	2.136	4.71	-1.947	0.97	1.39	Decrease	Decrease
2BQN	A	2BQA	A	A93V	1	130	130	1.8	1.8	-0.387602	1.98248	-0.483	3.48	5.949	2.241	0.2	1.46	Decrease	Decrease
3FA7	A	3F8A	A	E59W	1	137	137	1.9	1.95	-0.475485	0.253366	5.613	-6.579	-0.771	4.296	-0.38	0.36	Increase	Increase
1CH2	A	1CH3	A	F90W	1	154	154	1.8	2	-0.352114	1.28896				1.284	0.72	0.82	Increase	Decrease
2FOX	A	1FLD	A	G57T	1	138	138	1.8	1.8	3.46168	-0.835746	2.352	0.73	4.41	2.143	0.5	0.45	Decrease	Decrease
1HCH	A	2YLJ	A	S167Y	1	306	306	1.57	1.69	0.977641	2.66113	4.974	-0.981	4.132	2.816	0.41	0.89	Increase	Decrease
2XOV	A	2XTU	A	S111T	1	181	181	1.65	1.85	1.24897	0.891893			2.16	2.25	0.19	0.38	Increase	Increase
1DUE	A	1AGJ	A	A195S	1	242	242	2	1.7	0.64071	-0.659578	0.205	-1.761	0.329	-0.667	0.9	1.08	Decrease	Decrease
4HOW	A	4HPH	A	E254Q	1	559	559	1.7	1.7	1.17694	-0.193693			-4.009		0.77	0.85	Decrease	Decrease
3ZCF	A	3NWV	A	G41S	1	104	104	1.65	1.9	7.43147	-3.03392	8.472	-2.835	4.447	-1.955	1.43	1.15	Decrease	Decrease
1ZVQ	A	2RGD	A	G61L	1	166	166	2	2	-0.178833	2.17265	-0.294	5.387	5.165	3.206	-0.12	1.87	Increase	Decrease
1UID	A	1UIE	A	F15G	1	129	129	1.95	1.95	2.97668	3.91851	3.477	4.61	5.546	-2.095	2.31	0.49	Decrease	Decrease
4AVD	A	2VYZ	A	A56F	1	110	110	1.5	1.8	2.71733	1.51893			-0.747	5.219	0.57	1.66	Decrease	Decrease
1OUC	A	1GFT	A	A110Y	1	130	130	1.8	1.8	-0.325292	0.617709	1.254	-1.81	0.227	0.422	0.34	0.34	Decrease	Increase
3CDT	A	3CDR	A	N96Q	1	164	164	1.63	1.7	0.00911524	0.894797	-0.527	2.797	-0.783	6.181	1.18	1.34	Decrease	Decrease
109M	A	2MGF	A	H65Q	1	154	154	1.83	1.8	-0.125433	0.494012			-1.437	1.229	0.3	0.83	Increase	Decrease
219L	A	1QT7	A	E11N	1	164	164	1.66	1.8	0.679476	2.46961	-2.804	1.48	-1.009	0.686	0.88	1.15	Decrease	Decrease
1WOY	A	1A8H	A	F225Y	1	500	500	2	2	-1.04491	1.41073	-3.074	4.325	0.189	2.145	0.88	1.15	Decrease	Decrease
1OUG	A	1GFE	A	A2N	1	130	130	1.8	1.8	-0.526093	1.58489	-0.61	1.247	-0.058	0.642	0.7	0.33	Decrease	Decrease
1V2Q	T	1V2O	T	W154Y	1	223	223	2.3	1.62
1GBO	A	1GBY	A	G110M	1	130	130	1.8	1.8	-0.975462	0.267961	-3.56	2.934	0.027	1.089	0.24	0.39	Decrease	Decrease
3CDT	A	3FI5	A	N96W	1	164	164	1.63	1.53	6.22488	3.04197	14.894	-3.552	0.929	6.02	0.66	2.04	Decrease	Decrease
5CHY	A	3CHY	A	W105Y	1	128	128	2	1.66	0.182015	0.0540862				-0.01	0.92	0.75	Decrease	Decrease
1KOK	A	1MK8	A	H52Y	1	294	294	1.7	1.65	-1.31454	0.460258	-1.019	3.569	0.018	7.912	0.37	1.39	Increase	Decrease
1NE9	A	1XE4	A	K36M	1	335	335	1.7	1.95	-1.89689	2.21704	-5.059	6.673	-1.792	3.976	-0.16	1.52	Increase	Decrease
1L06	A	1L12	A	E157N	1	164	164	1.7	1.7	-0.45294	-0.13377	-2.381	4.356	-1.777	4.126	0.41	0.62	Decrease	Decrease
2NUM	A	2NUK	A	F110Y	1	141	141	1.5	1.2	0.081604	0.169511			2.035	1.42	0.71	1.13	Increase	Decrease
1L26	A	1L29	A	C86H	1	164	164	1.7	1.7	-0.27104	0.0471141	2.105	-1.66	0.295	-0.758	1.05	0.4	Decrease	Increase
1L03	A	1L13	A	C157R	1	164	164	1.7	1.7	-0.773512	-0.0271724	1.255	-1.338	-0.183	0.703	0.45	0.75	Decrease	Decrease
4PAZ	A	3PAZ	A	A80P	1	123	123	1.76	1.73	-0.685038	1.51687	6.202	-2.48	1.537	1.26	0.16	1.21	Increase	Decrease
1L07	A	1L10	A	F157I	1	164	164	1.7	1.7	0.301054	-0.792304	-3.375	3.219	2.84	2.001	0.99	0.54	Decrease	Decrease
2BQA	A	2BQC	A	I23V	1	130	130	1.8	1.8	1.19169	-1.02288	2.085	-0.27	2.06	0.806	0.84	0.36	Decrease	Decrease
3C8Q	A	1LYD	A	D96R	1	164	164	1.64	2	0.578914	4.15608	-5.003	4.99	0.941	8.91	0.85	1.64	Decrease	Decrease
2OSB	A	2EU8	A	L16Q	1	216	216	1.8	1.8	3.48109	-3.09677	7.292	-4.085	7.409	-0.362	2.33	0.28	Decrease	Decrease
4XQW	A	4HKL	A	E43H	1	189	189	1.5	1.1	-1.55108	2.12199				3.795	0.5	0.57	Decrease	Decrease
255L	A	254L	A	N20S	1	164	164	1.8	1.9	2.60379	0.81339	2.403	0.285	2.466	1.042	0.37	0.47	Increase	Decrease
2LHM	A	1I22	A	A83K	1	130	130	1.8	1.8	0.206135	0.374292	2.067	-1.423	0.203	0.242	1.29	1.22	Decrease	Decrease
4HBW	A	5ACY	A	E18Q	1	127	127	1.69	2.01	-0.202852	-0.0720744			1.03		0.15	0.17	Increase	Increase
4HLL	A	5GIK	A	S33Y	1	154	154	2.2	1.49	-0.267347	0.570366			1.3
1GE1	A	1B7R	A	A58G	1	130	130	1.7	1.8	-0.0392964	2.44519	2.145	0.765	1.302	3.517	1.54	0.79	Decrease	Decrease
2A49	A	5EE8	A	A141E	1	265	265	1.43	1.54	7.92571	0.325252					0.91	0.92	Decrease	Decrease
3C7W	A	3CDQ	A	K96S	1	164	164	1.77	1.68	1.36155	4.99353	0.017	2.919	3.247	-0.142	1.32	1.19	Decrease	Decrease
1L02	A	1L03	A	A157C	1	164	164	1.7	1.7	-0.0991882	0.380882	-1.869	0.646	0.51	0.714	1.15	0.55	Decrease	Decrease
2FGL	A	5EB8	A	F4W	1	354	354	2.2	2.22	0.0600275	0.0557462	5.845	-4.06	1.845		0.78	0.46	Decrease	Decrease
1GAY	A	1GFG	A	G2R	1	130	130	1.8	1.8	-0.89783	0.828618	-3.609	3.282	-0.701	2.701	0.37	0.68	Decrease	Decrease
1CAL	A	5E2S	A	A196T	1	258	258	2.2	1.5							0.51	1.07	Decrease	Decrease
3CHY	A	3OLW	A	A87T	1	128	128	1.66	2.3	0.736062	-0.51891			0.015	-0.155	0.6	0.69	Decrease	Decrease
3CHY	A	3OO0	A	A112P	1	128	128	1.66	1.55	-1.83901	1.94317			1.075	1.524	0.53	0.59	Increase	Decrease
4PAZ	A	6PAZ	A	A80I	1	123	123	1.76	1.91	-0.324721	0.630367	-0.214	0.905	4.329		0.41	1.19	Decrease	Decrease
1IOQ	A	1ILU	A	F110S	1	128	128	2.14	2.3	4.90435	3.12702	9.086	2.747	12.76	8.96	1.76	0.28	Decrease	Increase
1E67	A	1IOR	A	F12L	1	129	129	1.79	1.76	1.17344	-0.264799	0.675	3.558	4.629	1.004	0.52	1.17	Decrease	Decrease
1L09	A	1LYD	A	H157T	1	164	164	1.7	2	-0.479733	1.08954	-1.777	1.694	0.987	1.412	0.2	1.7	Decrease	Decrease
3K0R	A	2CYH	A	K54R	1	164	164	2.42	1.64	-0.214728	-0.0661634			1.868	0.752	0.53	0.73	Decrease	Decrease
1GB8	A	3FE0	A	M74V	1	130	130	1.8	1.5	0.579057	0.752742	2.031	0.048	0.475	1.75	0.47	0.38	Decrease	Decrease
1GBX	A	1INU	A	L110R	1	130	130	1.8	1.8	-0.0158262	0.27892	0.96	-1.273	1.307	-1.884	0.43	-0.28	Increase	Increase
1L08	A	1L09	A	G157H	1	164	164	1.7	1.7	0.117897	0.624021	-0.822	1.942	-0.008	4.234	1.46	0.89	Decrease	Decrease
3C8S	A	1LYD	A	E96R	1	164	164	1.68	2	1.79016	2.65371	-1.971	2.869	2.102	4.888	0.77	1.42	Decrease	Decrease
109M	A	2OHA	A	F139W	1	154	154	1.83	1.8	-0.688814	0.43697			-0.261	6.875	0.74	1.1	Increase	Decrease
2HSH	A	3M9J	A	C69S	1	105	105	1.35	1.1	0.641871	-1.00124	1.786	-1.222	1.365	-0.133	0.73	0.74	Decrease	Decrease
1L29	A	1LYD	A	H86P	1	164	164	1.7	2	0.92201	2.82867	14.167	-1.56	4.856	0.321	-0.01	1.55	Increase	Decrease
1CKF	A	1LZS	A	A52T	1	130	130	1.8	1.6	1.72904	0.545707	2.637	0.554		0.4	1.07	1.74	Decrease	Decrease
3CDO	B	3FI5	A	V96W	1	164	164	1.87	1.53	4.95603	1.49565	25.111	-6.943	5.54	6.059	1.93	1.06	Decrease	Decrease
1L25	A	1L26	A	A86C	1	164	164	1.8	1.7	0.450658	-0.647566	-0.487	0.683	0.821	-0.846	0.95	0.91	Decrease	Decrease
1AME	A	2MSJ	A	N47S	1	66	66	1.65	1.9	0.263526	-0.188502			2.884	-0.18	0.54	0.42	Decrease	Decrease
1OIB	A	2ABH	A	D141T	1	321	321	2.4	1.7	0.385959	1.49016	3.163	9.693	1.199	11.24	0.68	1.05	Decrease	Decrease
1GAZ	A	1GF9	A	I2Y	1	130	130	1.8	1.8	0.744444	-0.372755	8.974	-1.901	0.405	1.348	0.79	0.11	Decrease	Increase
1L11	A	1LYD	A	L157T	1	164	164	1.7	2	0.578526	0.96801	-1.325	1.033	0.141	0.047	1.36	1.23	Decrease	Decrease
2Y64	A	2Y6J	A	F110L	1	167	167	1.4	1.7	0.717489	-0.00586203	-2.623	1.461	2.023	-0.96	0.5	0.58	Decrease	Decrease
1AZI	A	1HRM	A	H93Y	1	153	153	2	1.7	-1.31692	2.02886	-1.408	3.685		3.622	-0.2	1.27	Increase	Decrease
1CWT	A	4WH7	A	C100S	1	178	178	2.3	1.62	-0.603914	0.708723					1.35	1.29	Decrease	Decrease
1CRN	A	1CNR	A	I25L	1	46	46	1.5	1.05	-0.112271	0.0680478	0.32	-0.936	0.496	1.278	0.1	0.66	Decrease	Decrease
4XQW	A	3AKP	A	E43N	1	189	189	1.5	1.2	0.260299	2.05969		-0.069		1.05
109M	A	2SPO	A	L30V	1	154	154	1.83	1.7	1.4248	-0.639489			7.593	1.045	1.53	0.94	Decrease	Decrease
1KBK	A	3BAI	A	A196D	1	495	495	1.9	1.9	0.592073	-0.583038	-0.139	-0.89	6.526	-1.317
4XPW	A	4XPY	A	F114Y	1	131	131	1.17	1.13	1.47914	-0.655655	2.927	-1.384			1.44	1.07	Decrease	Decrease
1TCY	A	1D6P	A	F63L	1	130	130	1.7	2.23	-0.453693	0.262447	-2.698	2.231	1.601		0.98	0.82	Decrease	Decrease
1RSE	A	1AZI	A	D92S	1	153	153	1.7	2	0.191346	-0.155463	0.645	-1.389	0.778		0.39	0.07	Decrease	Increase
2JI0	A	2BXW	A	K71Y	1	138	138	2.1	2.4	0.292476	1.40297			-1.236	1.196	0.18	1.13	Increase	Decrease
3ZS4	A	2Y88	A	D10N	1	244	244	1.9	1.33	0.276733	0.961363			-0.154	1.753	1.01	1.26	Decrease	Decrease
4I03	A	5I43	B	A115Q	1	159	159	1.7	1.95	2.64993				10.421		0.63	0.25	Decrease	Increase
1KVX	A	1BP2	A	A99D	1	123	123	1.9	1.7	-0.745462	3.99041	6.204	-0.776	0.775	0.704	1.25	0.71	Decrease	Decrease
1AKR	A	1AKT	A	A60N	1	147	147	1.58	1.8	0.346463	0.0787061			0.556	0.596	0.74	0.36	Decrease	Increase
1GB3	A	1GFG	A	F2R	1	130	130	1.8	1.8	-0.51979	1.30975	-0.326	7.832	2.614	1.208	0.6	0.05	Decrease	Decrease
3UNQ	A	3UNS	A	L209V	1	223	223	1.62	1.8
1E1A	A	2IAO	A	E35Q	1	312	312	1.8	2	-0.47409	0.406226			-0.337	1.413	0.28	0.27	Decrease	Increase
4ZRE	A	3UUE	A	D253F	1	279	279	2	1.45	0.405731	1.96409				4.848	-0.1	1.34	Decrease	Decrease
1GB6	A	1GFR	A	I74R	1	130	130	1.8	1.8	0.104198	-0.207664	0.433	-1.231	1.222	0.746	0.72	0.21	Decrease	Decrease
242L	A	219L	A	A50I	1	164	164	1.8	1.66	-1.85628	2.34846	5.577	2.57	1.031	2.689	-0.12	2.07	Increase	Decrease
1L26	A	1L28	A	C86G	1	164	164	1.7	1.9	-0.0577852	0.576887	3.844	-3.176	0.847	-0.374	1.33	1.15	Decrease	Decrease
1P2L	A	219L	A	I87V	1	164	164	1.58	1.66	0.842191	0.25	-0.735	0.905	1.646	5.528	0.95	0.57	Decrease	Decrease
1L04	A	1LYD	A	D157T	1	164	164	1.7	2	1.34023	0.986929	-0.548	1.581	-2.541	3.295	0.08	1.3	Decrease	Decrease
1CCI	A	1CCL	A	G199K	1	291	291	2.4	2	-2.96123	2.43835			11.191	-0.092	0.79	1.38	Decrease	Decrease
1L02	A	1L06	A	A157E	1	164	164	1.7	1.7	-0.182893	0.0177227	-2.231	-0.687	1.911	-1.912	1.17	0.26	Decrease	Decrease
1IP3	A	3FE0	A	A68G	1	130	130	1.8	1.5	-0.749312	2.45909	0.365	-0.503	-1.551	4.317	1.12	0.93	Decrease	Decrease
2MEE	A	2MEH	A	L59T	1	130	130	1.8	1.8	4.44287	-3.41988	7.833	-5.854	7.871	2.39	2.11	0.46	Decrease	Decrease
4Z7P	A	4LFQ	A	K16Q	1	35	35	1.2	1.06	-0.249246	0.324394	-0.301	0.201		1.637	1.05	1.08	Decrease	Decrease
1EIC	A	1EID	A	A120G	1	124	124	1.4	1.4	0.694115	-0.72995	2.9	-3.263	2.999	1.093	1.65	1.34	Decrease	Decrease
3FE0	A	1I20	A	A92D	1	130	130	1.5	1.9	2.61835	-1.10378	5.783	-3.79	7.125	-3.74	1.27	0.88	Decrease	Decrease
1DIW	A	1D0H	A	E56S	1	441	441	2	2.1	0.40344	-0.404792					0.66	0.24	Decrease	Increase
2MED	A	2HEE	A	F59G	1	130	130	1.8	1.8	6.13772	-0.0406272	10.175	-1.617	13.369	1.316	2.12	0.52	Decrease	Decrease
1HGW	A	1QK0	A	A91D	1	363	363	2.1	2.1	1.58612	2.0854					0.97	0.6	Decrease	Increase
3C7Y	A	3CDT	A	A96N	1	164	164	1.95	1.63	2.68499	-0.096396	2.929	-0.391	3.537	1.778	1.75	1.57	Decrease	Decrease
1CV3	A	1KS3	A	L118M	1	162	162	1.8	2.16	0.184184	0.219132	3.098	-2.223		-3.769	1.08	0.36	Decrease	Decrease
4BLI	A	4LBJ	A	K64L	1	138	138	1.08	1.8	-1.01304	1.26637			-1.115	3.015	0.1	1.72	Increase	Decrease
1YPA	I	1YPC	I	A12S	1	64	64	2	1.7	-0.173636	0.924343			-0.683	1.449	1.16	0.36	Decrease	Decrease
4GKC	A	4EEJ	A	A4R	1	133	133	1.3	1.5	5.93603	4.15318	5.272	9.159	5.641	0.282	0.55	1.29	Decrease	Decrease
5DG4	A	4ZGU	A	L60W	1	133	133	1.5	1.49	-0.497496	0.781926	7.856	-3.278			1.16	0.86	Decrease	Decrease
1P7S	A	219L	A	I103V	1	164	164	1.5	1.66	1.29126	0.378929	1.589	1.871	1.929	2.927	0.7	0.4	Decrease	Decrease
1IOT	A	193L	A	L12M	1	129	129	1.75	1.33	-0.26679	-0.0535563	0.683	-0.959	2.514	0.435	0.92	0.66	Decrease	Decrease
1C8Y	A	1C8X	A	A125E	1	265	265	2	2	9.83909	-2.3027					0.91	0.9	Decrease	Decrease
1CIJ	A	1BEZ	A	W175Y	1	310	310	2.3	2.1	1.88567	3.1711	1.675	7.964	4.302	-0.222	0.88	0.95	Decrease	Decrease
1E67	A	3FQY	A	C112D	1	128	128	2.14	1.9	6.36852	-2.75304	-0.887	-1.821	-4.068	2.745	0.79	0.55	Decrease	Decrease
2YL6	A	2YL8	A	E181Q	1	434	434	1.6	1.75	-1.15135	1.64634			-1.752	3.063	0.91	0.63	Decrease	Decrease
3BF7	A	3BF8	A	L78Q	1	255	255	1.1	1.68	2.01206	-2.01421	3.302	-4.212	3.12	-1.28	1.97	0.11	Decrease	Decrease
1L34	A	3CDO	B	H96V	1	164	164	1.9	1.87	0.0786495	4.18561	1.894	13.512	4.299	1.849	0.18	2.6	Increase	Decrease
1GB5	A	3FE0	A	G74V	1	130	130	1.8	1.5	0.481724	0.580641	0.267	5.124		3.269	0.56	1.25	Decrease	Decrease
1AH7	A	1P5X	A	D55N	1	245	245	1.5	2	0.487074	0.502191	-2.57	2.931	9.217	-0.671	0.45	0.92	Increase	Decrease
1OUC	A	1GBW	A	A110I	1	130	130	1.8	1.8	-0.101548	0.17791	0.051	0.426	0.74		0.05	0.82	Increase	Decrease
5DJ7	A	5DK1	A	D160N	1	230	230	0.87	0.94	0.599416	-0.352242	-1.111	0.841
4ZGU	A	4QYN	A	W60Y	1	133	133	1.49	1.19	1.04713	1.47345	-2.649	8.658		1.619	1.01	1.22	Decrease	Decrease
1GBO	A	1GBX	A	G110L	1	130	130	1.8	1.8	-0.870921	0.892793	-2.11	2.057	-0.358	0.604	0.2	1.05	Decrease	Decrease
3KUE	A	1DY3	A	A77E	1	158	158	1.54	2	0.646041	0.00156382	1.26	1.788	5.098		0.95	0.85	Decrease	Decrease
3C7Y	A	3C8S	A	A96E	1	164	164	1.95	1.68	2.23432	-0.184069	1.546	0.3	3.523	0.629	1.57	1.25	Decrease	Decrease
1BVV	A	3VZJ	A	E172H	1	185	185	1.8	2.41	2.73585	0.402451	4.307	2.036	-0.076	3.112	0.7	0.85	Decrease	Decrease
1N7N	A	1N7P	A	F174V	1	721	721	1.55	1.55	1.27345	0.854958			1.749	3.093	0.74	0.81	Increase	Decrease
1MOB	A	109M	A	G65H	1	154	154	2.2	1.83	-0.753524	1.39281			-0.903	2.467	1.25	1.08	Decrease	Decrease
3DDK	A	4ZP9	A	F364I	1	462	462	2.25	1.8	5.45946	-0.371246	4.345	2.788	8.322		0.44	0.29	Decrease	Decrease
2C2S	A	3NXO	A	K63R	1	186	186	1.4	1.35	0.201004	-0.224583	-1.078	3.068	1.18	-0.939	-0.11	0.22	Increase	Decrease
1L25	A	1L32	A	A86S	1	164	164	1.8	1.7	-0.00219138	-0.472848	0.7	-1.498	-0.119	-1.746	1	0.85	Decrease	Decrease
1UGB	A	1UGE	A	G63L	1	258	258	2	1.9	2.30692	0.115832			4.514	1.528	0.15	1.76	Increase	Decrease
1A54	A	1A40	A	C197W	1	321	321	1.6	1.7	-1.86437	2.93706	3.332	-14.597	-5.676	7.908	0.4	1.08	Decrease	Decrease
2HEA	A	3FE0	A	A106I	1	130	130	1.8	1.5	-1.24343	3.91143	4.1	5.349	0.902	4.332	0.22	2.19	Decrease	Decrease
1AME	A	1B7I	A	K62R	1	66	66	1.65	1.65	0.183894	-0.190122			1.188	0.01	0.45	0.91	Decrease	Decrease
1IP4	A	3FE0	A	A72G	1	130	130	1.8	1.5	-0.309316	2.20251	0.695	0.669	-1.157	2.363	0.86	0.66	Decrease	Decrease
5CS7	A	4RMR	A	D39N	1	100	100	2.1	1.53	-0.840446	2.11258					1.89	1.62	Decrease	Decrease
1AXQ	A	1FF2	A	C42D	1	106	106	2.1	2.3	0.94337	-0.383058	1.895	-1.071			0.93	0.83	Decrease	Decrease
2MGA	A	2MGF	A	G65Q	1	154	154	2.2	1.8	-1.50843	2.13569			-2.5	5.12	0.8	1.3	Decrease	Decrease
2FD2	A	1AXQ	A	A24C	1	106	106	1.9	2.1	-0.146155	0.263512	0.538	0.301	3.434		1.26	1.41	Decrease	Decrease
1B7P	A	1LZS	A	G78H	1	130	130	2	1.6	1.92078	-0.709685	0.326	0.193		0.061	1.33	0.5	Decrease	Decrease
5CXA	A	1RMZ	A	A137K	1	159	159	1.3	1.34	-0.628164	0.984495				2.122
1YMR	A	1YMW	A	A92G	1	124	124	1.5	1.5	0.910904	1.42501	4.024	-1.606	2.996	7.469	1.36	0.86	Decrease	Decrease
1QGI	A	2D05	A	K218P	1	259	259	1.6	2	-0.419004	0.611852	3.591	-0.026	6.768	-2.159	-0.01	1.05	Increase	Decrease
1GBW	A	3FE0	A	I110V	1	130	130	1.8	1.5	0.412085	-0.418579	-0.393	0.066		0.22	0.12	-0.31	Decrease	Increase
1GFJ	A	1GB9	A	D74F	1	130	130	1.8	1.8	-0.0107439	1.52583	1.871	-1.468	-2.654		-0.09	0.85	Decrease	Decrease
2XXK	A	2WYK	A	D150N	1	308	308	1.48	1.5	0.657035	1.1236	0.758	-0.77	1.779	0.269	0.08	0.71	Decrease	Decrease
3F9L	A	3FA0	A	A72D	1	162	162	1.19	1.09	0.509412	-0.340681	0.9	-0.818	1.999	-2.026	1.22	0.22	Decrease	Decrease
5JN1	A	4BCW	A	N64Q	1	257	257	1.52	1.5	-1.50504	0.988708				4.941
1GF7	A	3FE0	A	T100V	1	130	130	1.8	1.5	1.75451	1.53057	-1.748	3.456	0.352	2.313	0.97	0.77	Decrease	Decrease
3X1Z	A	3X1W	A	A65T	1	167	167	1.25	1.2	-0.140606	0.354608	2.146	0.977	1.027		0.76	0.79	Decrease	Decrease
1AH7	A	2FFZ	A	E4Q	1	245	245	1.5	2.05	0.0675905	0.585211	0.458	0.369	2.566	1.876	0.84	0.57	Decrease	Increase
3NP3	A	3FQ2	A	E121F	1	128	128	2.1	1.91	23.2659	4.27717	12.806	7.202	7.496	13.223	-0.32	1.33	Increase	Decrease
1CH2	A	109M	A	F90L	1	154	154	1.8	1.83	0.205097	0.296784				-0.466	0.53	0.79	Decrease	Decrease
109M	A	2OHB	A	I108W	1	154	154	1.83	1.8	0.553779	2.80041			3.839	3.951	1.09	0.42	Decrease	Decrease
1CIK	A	109M	A	A100I	1	154	154	1.7	1.83	-0.716503	3.25364			0.12	5.127	-0.28	2.13	Increase	Decrease
3CMQ	A	5MGV	A	D279Y	1	405	405	2.2	2.05	-0.762407	1.14014			-0.833
2AT0	X	2AT3	X	L123V	1	184	184	1	1	0.625699	-0.984471	-1.908	5.476	1.507	0.302	0.99	0.89	Decrease	Decrease
1BCX	A	1BVV	A	C172E	1	185	185	1.81	1.8	-0.0764665	1.10232	2.857	1.122		0.472	0.93	0.7	Decrease	Decrease
1H4A	X	1HK0	X	H58R	1	173	173	1.15	1.25	0.577064	0.398654	1.558	-0.903	4.11	-2.344	1.06	1.63	Decrease	Decrease
1I1Z	A	3FE0	A	D86Q	1	130	130	1.8	1.5	0.904427	-0.0915323	-0.047	1.308	-2.639	5.184	0.36	0.69	Decrease	Decrease
2RGA	A	2RGB	A	I61K	1	166	166	1.9	1.35	0.909001	-0.596295	5.113	-2.17			0.97	-0.17	Decrease	Increase
1PQD	A	1PQJ	A	A111V	1	164	164	1.65	1.9	-0.138824	1.88494	0.524	2.755		1.637	-0.01	1	Increase	Decrease
2HEE	A	2MEE	A	G59L	1	130	130	1.8	1.8	-3.36216	4.727	-4.517	9.228	4.046	7.39	0.3	2.72	Decrease	Decrease
1GFA	A	3FE0	A	D2V	1	130	130	1.8	1.5	0.252525	0.230434	-3.872	3.146	-3.625	4.483	-0.13	1.1	Decrease	Decrease
3CDQ	A	3CDO	B	S96V	1	164	164	1.68	1.87	6.13026	0.731274	3.47	3.877	2.195	1.143	0.03	2.62	Increase	Decrease
4NFC	A	4NFD	A	L109W	1	120	120	2.2	1.71	5.88855	3.31224	9.49	6.081	1.31	11.328	1.77	0.96	Decrease	Decrease
5FKT	A	5FKR	A	A449D	1	731	731	1.52	2.28	-0.282885	0.33171					0.39	-0.59	Increase	Increase
1GFK	A	1B7S	A	N74S	1	130	130	1.8	2	0.003634	0.427875	0.295	-0.576	1.326		0.06	0.56	Decrease	Decrease
1L45	A	1LYD	A	E135K	1	164	164	1.7	2	-1.02509	0.645361	2.583	-1.883	-1.104	1.224	0.54	0.2	Decrease	Decrease
1GBZ	A	1GFV	A	F110N	1	130	130	1.8	1.8	1.08841	-0.767424	-2.104	2.556			0.49	-0.5	Increase	Increase
1BEJ	A	1BEQ	A	G188Y	1	291	291	2.4	2.16	0.069545	1.26773			1.533		-0.1	1.3	Increase	Decrease
4R3M	A	2CCS	A	S48T	1	209	209	1.8	1.79	1.0495	-0.264259			2.733	0.977	0.75	1.08	Decrease	Decrease
2QFQ	A	2QFS	A	L101S	1	427	427	1.5	1.55	4.52445	-3.42075	4.979	-5.741	6.973	-1.386	0.99	0.55	Decrease	Increase
3C8S	A	3CDR	A	E96Q	1	164	164	1.68	1.7	0.402356	1.36576	-0.731	1.433	-2.144	4.77	1.02	1.01	Decrease	Decrease
4QAP	A	4QBW	A	N263T	1	299	299	1.9	1.91	1.36819	0.760579	0.192	0.303	0.841	3.084	0.1	1.25	Decrease	Decrease
1CB2	A	1QK0	A	F85Y	1	363	363	2	2.1	-0.158987	0.956574					1.47	1.15	Decrease	Decrease
8CGT	A	1CGT	A	A257E	1	684	684	2.4	2	0.238358	0.531876	3.599	-1.557			1.16	0.49	Decrease	Decrease
1QOF	A	1CZP	A	K70Q	1	98	98	1.8	1.17	0.314676	-0.474699	-2.621	2.481	-1.648	1.918	0.68	0.7	Decrease	Decrease
1HZI	A	2B8U	A	A9E	1	129	129	2.05	1.8	-0.267047	0.103011	1.315	-0.517	1.375	-1.316	0.95	0.57	Decrease	Decrease
1BEP	A	1BEQ	A	W188Y	1	291	291	2.2	2.16	2.50398	0.0177276					0.5	0.1	Decrease	Increase
1CZL	A	1CZR	A	D90N	1	169	169	1.8	1.9	-1.15482	1.58089	-1.308	1.472	-1.487	3.249	0.27	0.76	Increase	Decrease
1UFP	A	109M	A	D123N	1	154	154	2.1	1.83	0.063226	0.740179			0.527	2.789	0.35	0.24	Decrease	Decrease
1IX0	A	2BQA	A	A59I	1	130	130	1.8	1.8	-0.831072	3.0341	-2.861	6.742	-1.642	6.279	0.1	2.06	Increase	Decrease
104M	A	4OF9	A	K42N	1	153	153	1.71	1.24	1.40869	-1.51254	0.228	3.099	0.097	-0.792	0.21	0.63	Increase	Decrease
1GB8	A	1GFK	A	M74N	1	130	130	1.8	1.8	0.381832	-0.389201	1.99	-2.445	-0.764	0.022	0.7	-0.4	Decrease	Increase
1FZU	A	1BU4	A	A78V	1	104	104	1.8	1.9	-3.0745	3.50727	-5.605	5.395	-3.544		0.31	1.8	Decrease	Decrease
3FQ2	A	3FPY	A	F121L	1	128	128	1.91	2.1	1.10341	10.1196	2.558	16.891	10.944	7.685	0.53	0.74	Decrease	Decrease
2EID	A	2EIE	A	G290W	1	639	639	2.2	1.8	21.9864	0.395234	73.244	-14.349	3.533		0.48	1.23	Increase	Decrease
1C9X	A	3A1R	A	A119H	1	124	124	1.8	1.7	0.116064	0.776033	1.697	-0.129		0.877	1.06	0.28	Decrease	Increase
1JIO	A	1JIP	A	A244S	1	403	403	2.1	2	0.632561	-0.636413			1.269	-1.222	0.73	0.99	Decrease	Decrease
4GUL	A	4HLT	A	E30V	1	288	288	1.8	1.7	1.68862	0.216157			2.399	5.778	-0.01	1.74	Increase	Decrease
1SQM	A	3CHO	A	A563R	1	610	610	2.3	1.8	1.18669	0.513196	0.771	3.087	0.986	0.239	0.53	1.33	Decrease	Decrease
219L	A	1G0L	A	T152V	1	164	164	1.66	1.8	-1.20061	0.605537	-1.557	3.918	0.199	3.497	1.04	1.64	Decrease	Decrease
1L03	A	1L11	A	C157L	1	164	164	1.7	1.7	-0.0812015	0.684533	0.905	-0.822	-0.76	0.829	0.3	1.56	Decrease	Decrease
4RMW	A	4RMV	A	A77H	1	100	100	1.4	1.46	1.15933	0.852665					0.83	0.36	Decrease	Decrease
2E22	A	1J0M	A	I136T	1	752	752	2.4	2.3	2.44545	-3.2703			6.429	-3.522
4AVD	A	1V07	A	T49V	1	110	110	1.5	1.7	-0.125646	1.6345			2.655	2.188	0.4	1.14	Decrease	Decrease
4RMV	A	5CSB	A	H77N	1	100	100	1.46	1.72	0.259866	-0.0234434					0.34	0.5	Increase	Decrease
2D81	A	2D80	A	A19S	1	318	318	1.66	1.7	0.479262	1.31293					0.35	0.45	Decrease	Decrease
2PWG	A	2PWE	A	E253Q	1	556	556	2.2	2	1.02314	0.0547807			-0.016		0.81	0.97	Decrease	Decrease
4PPT	A	4POY	A	E102Q	1	121	121	1.5	1.5	-0.0320321	0.0837114	1.188	-0.292	0.353	1.959	0.21	0.11	Decrease	Increase
1BEJ	A	1BEM	A	G188Q	1	291	291	2.4	2.2	-0.89519	0.72728			2.512		0.32	0.25	Decrease	Increase
1GBO	A	1GFT	A	G110Y	1	130	130	1.8	1.8	-0.990055	1.14675	-0.221	0.51	-0.462	0.826	0.56	0.62	Decrease	Increase
2NVG	A	2NVF	A	A108C	1	141	141	1.35	1.5	0.157931	-0.128842			1.256	0.961	0.94	1.17	Decrease	Decrease
1A4A	A	2AZA	A	H121M	1	129	129	1.89	1.8	4.39502	18.112	-4.208	24.673	2.734	5.691	-0.23	1.38	Increase	Decrease
4HSW	A	3DR9	A	F100L	1	137	137	1.22	1.26	0.581088	-0.359649	-0.101		6.321		0.25	0.94	Decrease	Increase
3WW6	A	1LSY	A	D46N	1	129	129	1.53	1.9	-0.491497	0.373446	-0.622	2.485	-1.44	4.853	0.96	0.58	Decrease	Increase
1Q9E	A	1CH0	A	N46Q	1	104	104	1.7	2.3	0.940597	0.479866	1.664	2.5	0.754	2.802	0.33	-0.03	Decrease	Increase
1UCK	A	1LNI	A	T43V	1	96	96	1.8	1	-0.692679	0.67026	-3.077	3.409	-0.837	2.558	0.81	1.44	Decrease	Decrease
1GB2	A	1GF8	A	M2S	1	130	130	1.8	1.8	0.251342	-0.297791	4.534	-4.282	1.631	-0.814	0.63	-0.08	Decrease	Increase
1IP6	A	3FE0	A	A127G	1	130	130	1.8	1.5	-2.05237	2.35499	-0.474	0.217	-2.327	3.695	0.7	0.54	Decrease	Decrease
5TP0	A	1H4W	A	A68V	1	224	224	1.25	1.7
1Z32	X	1C8Q	A	M150Y	1	495	495	1.6	2.3	0.330416	-0.205538	-0.333	1.254	-2.767
1GFJ	A	1GB6	A	D74I	1	130	130	1.8	1.8	1.16147	-0.155248	5.615	0.773	-0.181	2.726	0.04	0.96	Increase	Decrease
1MOB	A	1MGN	A	G65Y	1	154	154	2.2	1.9	-1.81773	2.92333			-1.319	7.768	0.33	2.19	Decrease	Decrease
3PLB	A	1V2N	T	I205V	1	223	223	1.18	1.8
253L	A	255L	A	A20N	1	164	164	2	1.8	-1.55205	2.09089	-3.872	1.829	-1.465	3.489	0.74	0.83	Decrease	Decrease
1VZ3	A	4AMY	A	C597T	1	710	710	1.6	2	6.54662	0.159855	1.064	-0.597	-0.066		-0.23	0.45	Increase	Decrease
3CDV	A	3FI5	A	M96W	1	164	164	1.73	1.53	8.53456	-0.441571	29.131	-7.392	10.598	4.708	1.48	1.02	Decrease	Decrease
1QT5	A	255L	A	E20N	1	164	164	1.8	1.8	-1.85548	2.93596	-5.641	2.97	-5.018	5.348	0.57	0.27	Decrease	Increase
3C7W	A	1LYD	A	K96R	1	164	164	1.77	2	0.496929	0.0967621	-4.551	5.567	-2.091	2.469	0.84	1.71	Decrease	Decrease
3BLP	X	1C8Q	A	A387W	1	495	495	1.6	2.3	-2.7547	2.21645	2.163	0.367	-3.922
4MSI	A	7MSI	A	T17Y	1	66	66	1.6	1.7	-0.585272	1.24579			-0.621		0.5	0.7	Decrease	Decrease
2HEB	A	3FE0	A	A23I	1	130	130	2.2	1.5	-2.47657	3.41716	-4.234	7.215	0.115	5.253	0.28	2.28	Increase	Decrease
3C8R	A	3FI5	A	G96W	1	164	164	1.8	1.53	7.47114	3.08518	21.103	-1.901	2.184	8.685	0.92	2.71	Decrease	Decrease
1L09	A	1L14	A	H157S	1	164	164	1.7	1.7	0.288604	-0.174502	0.459	2.414	0.891	0.656	0.54	0.96	Decrease	Decrease
2MEA	A	2MEC	A	F56M	1	130	130	2.2	2.2	0.817083	6.69144	-4.39	22.082	5.505	2.967	0.41	0.83	Decrease	Decrease
1GFA	A	1GAY	A	D2G	1	130	130	1.8	1.8	0.341476	-0.426347	1.179	-2.457	-0.911	-0.074	0.44	0.81	Increase	Decrease
1PC5	A	1AXQ	A	G50P	1	106	106	1.8	2.1	-2.50254	2.85025	-0.884	0.375	2.038		0.7	1.96	Decrease	Decrease
1LYD	A	1L24	A	A82P	1	164	164	2	1.7	-1.1233	1.11886	2.91	-2.541	-1.244		-0.01	1.03	Increase	Decrease
1GFA	A	1GB0	A	D2L	1	130	130	1.8	1.8	-0.453097	0.56895	-1.976	1.595	-3.766		-0.27	1.46	Decrease	Decrease
3PXM	A	1IV7	A	A37V	1	96	96	1.8	1.82	-1.81221	3.08346	-3.434	6.005	4.642	5.074	0.29	1.76	Decrease	Decrease
1AZI	A	3HC9	A	H64V	1	153	153	2	2	0.0993714	1.90837	-0.166	1.73		1.991	-0.53	1.77	Increase	Decrease
3HAO	A	4Y9H	A	A89L	1	226	226	2.49	1.43	-3.68296	3.9419			3.928		0.5	2.02	Increase	Decrease
2OFR	X	1SXX	A	A36V	1	184	184	1	1.01	-0.201656	0.349265	1.476	-1.389	-1.658	2.062	0.48	1.5	Decrease	Decrease
2NVG	A	2NUK	A	A108S	1	141	141	1.35	1.2	2.20589	-0.752431			2.438	-2.177	0.74	1.35	Decrease	Decrease
1GFA	A	1GF8	A	D2S	1	130	130	1.8	1.8	-0.590555	0.0733948	0.829	-1.27	-2.08	1.218	0.15	0.16	Increase	Increase
1DX9	A	1FTG	A	A56W	1	168	168	2.05	2	12.5272	0.867944			6.195		0.04	0.99	Increase	Decrease
1L08	A	1LYD	A	G157T	1	164	164	1.7	2	0.100532	1.51841	-1.52	3.671	-0.117	1.939	0.84	2.06	Decrease	Decrease
2JG6	A	4AI4	A	E38Q	1	186	186	1.7	1.73	-0.698389	1.18072	0.083	0.708	-3.757	4.263	0.45	0.38	Decrease	Decrease
1GB7	A	1GFK	A	L74N	1	130	130	1.8	1.8	0.320482	-0.317321	1.2	-1.369	1.43	-1.055	1.26	-0.19	Decrease	Increase
1PAH	A	1TDW	A	A197T	1	308	308	2	2.1	2.09998	0.654871			5.955	1.289	0.93	1.49	Decrease	Decrease
5JAI	A	3ZU3	A	G282S	1	405	405	1.9	1.8	-0.251292	1.47712				3.566	1.08	1.18	Decrease	Decrease
4BK7	A	4A80	A	F5Y	1	159	159	1.14	1.96	0.724702	-0.00346274	-3.577	2.055	0.553	0.17	0.81	0.65	Decrease	Decrease
1L34	A	3CDR	A	H96Q	1	164	164	1.9	1.7	-0.462592	6.95478	-0.647	18.156	-0.312	10.251	1.16	1.41	Decrease	Decrease
2MGC	A	1MOC	A	L65T	1	154	154	1.9	2	2.42432	-1.85074			3.961	-0.305	1.82	0.51	Decrease	Decrease
1BTI	A	1BPI	A	A22F	1	58	58	2.2	1.09	-0.285588	3.49492	4.594	-6.244	-2.982	9.037	0.82	2.43	Decrease	Decrease
1BCZ	A	1A8A	A	S71T	1	318	318	2.2	1.9	0.676122	-0.23008			0.521	1.003	0.06	0.31	Increase	Decrease
4F6B	A	4AVD	A	F101H	1	110	110	1.64	1.5	1.1444	-0.828355			0.653	0.036	1.11	0.18	Decrease	Decrease
3AKP	A	4HK8	A	E176Q	1	189	189	1.2	1.15	-0.3667	0.520862	2.336		-2.236	4.742
3HSD	A	1DY3	A	A53Y	1	158	158	1.65	2	5.44416	2.75291	26.561	5.896	-3.03		0.55	2.07	Decrease	Decrease
2IAR	A	2IAT	A	H242L	1	312	312	1.9	1.9	-0.503909	2.75851			4.033	-1.174	-0.16	0.81	Increase	Increase
1IX0	A	2BQE	A	A59V	1	130	130	1.8	1.8	-0.284089	1.53318	-1.913	4.143	-2.019	4.906	0.28	1.45	Increase	Decrease
1PQO	A	219L	A	I118L	1	164	164	1.65	1.66	-1.29062	2.23338	-1.789	2.268	-0.098	6.258	0.36	1.11	Decrease	Decrease
1GBX	A	1GBY	A	L110M	1	130	130	1.8	1.8	-0.0594293	-0.000615748	-0.755	0.687	0.2	-0.01	0.22	-0.15	Increase	Increase
6PAZ	A	3PAZ	A	I80P	1	123	123	1.91	1.73	1.33527	1.00369	10.735	-3.47		1.42	0.89	0.86	Decrease	Decrease
3FE0	A	1GF5	A	A96S	1	130	130	1.5	1.8	1.37408	-1.41819	1.843	-1.75	3.381	-2.563	1.31	1.07	Decrease	Decrease
3A1R	A	1IZP	A	F46L	1	124	124	1.7	1.5	1.20111	-1.26838	4.993	1.559	5.557	-2.385	1.93	1.57	Decrease	Decrease
2RN2	A	1RDB	A	E48Q	1	155	155	1.48	1.9	0.783775	0.744488	0.881	0.568	-3.41	4.748	0.35	0.54	Decrease	Decrease
1DLR	A	2C2S	A	F22L	1	186	186	2.3	1.4	-0.0253152	-0.012587	-1.631	1.671		0.29	0.98	1.05	Decrease	Decrease
1L44	A	1LYD	A	E119R	1	164	164	1.7	2	-0.21729	0.135772	-0.575	0.281		1.241	-0.22	0.48	Increase	Decrease
1BRJ	A	2F4Y	A	A86I	1	108	108	2	2.15		4.31748		6.172		5.873	0.46	3.57	Increase	Decrease
2H3W	A	1T7N	A	A528S	1	599	599	2.1	1.9	0.747742	0.538974			0.157	0.365	1	1.2	Decrease	Decrease
1JKA	A	3FE0	A	D35E	1	130	130	1.66	1.5	0.280695	0.777963	0.322	0.276	-2.427	6.549	0.29	0.68	Decrease	Decrease
4TTN	A	4TTM	A	A6G	1	29	29	1.25	1.9	-1.11172	1.46032	1.045	-0.519			1.4	1.16	Decrease	Decrease
1L03	A	1L09	A	C157H	1	164	164	1.7	1.7	-0.183355	0.256895	0.773	-1.211	0.136	2.488	0.91	0.46	Decrease	Increase
1G0P	A	1G06	A	G149S	1	164	164	1.8	1.85	-0.0441032	1.00164	-1.906	1.228	0.721		1.1	1.73	Decrease	Decrease
1GB6	A	1GB7	A	I74L	1	130	130	1.8	1.8	-0.0460654	0.00776164	0.084	2.065	0.006	1.395	0.29	0.81	Decrease	Decrease
2XWO	A	2WYK	A	E147R	1	308	308	1.54	1.5	0.710506	4.00696	14.67	-12.996	3.27	0.281	0.34	1.01	Decrease	Decrease
1T7A	A	1T7B	A	D10Q	1	66	66	1.5	1.85	1.74461		4.057		2.598		1.07	0.86	Decrease	Decrease
9AME	A	1AME	A	G43S	1	66	66	1.8	1.65	2.94996	-1.12483				-2.853	0.95	0.7	Decrease	Decrease
2PWF	C	2PWG	A	A199D	1	556	556	1.8	2.2		-2.89134			7.411	-4.196	1.26	1.01	Decrease	Decrease
4AME	A	1AME	A	A19T	1	66	66	2.05	1.65	0.075614	0.0953951			0.212	1.602	1.28	1.21	Decrease	Decrease
106M	A	1MLQ	A	F69L	1	154	154	1.99	2	1.89987	-1.41627			2.801	-2.325	0.26	0.88	Decrease	Decrease
5GIF	A	3V8I	A	D27E	1	210	210	1.3	1.8	2.97427	-1.37098				2.838
1G0K	A	1G0L	A	C152V	1	164	164	1.85	1.8	-0.475953	1.28966	-2.811	5.641	-0.441	3.632	0.61	1.57	Decrease	Decrease
4KMW	A	3DR9	A	N34Y	1	137	137	1.79	1.26	0.243876	1.89131	-0.776		1.503		0.26	1.16	Decrease	Decrease
1GFE	A	1GFG	A	N2R	1	130	130	1.8	1.8	1.09953	0.215018	-0.125	0.378	0.705	1.321	-0.21	0.57	Increase	Decrease
5EET	A	5F0B	A	F104W	1	148	148	2	2.15	0.408015	0.142368					1.46	1.17	Decrease	Decrease
5K0F	A	5K0L	A	E155K	1	219	219	1.81	2.02	-0.795223	0.523756
1LYD	A	1L97	A	I3P	1	164	164	2	2	1.23346	-0.0912849	6.862	-6.441	6.748	4.656	2.41	0.76	Decrease	Decrease
2IAS	A	2IAU	A	F242Y	1	312	312	2	2	-0.162067	0.577387			1.604	3.526	0.27	0.43	Increase	Increase
2B6T	A	5KHZ	A	A99L	1	162	162	2.1	1.49	-3.51042	3.47605	-4.718	6.769	-6.693
4I3D	A	4I3B	A	A57N	1	139	139	2.3	1.2	-0.0364539	0.0467927	0.794	1.661	1.627	0.608	0.8	0.75	Decrease	Decrease
1BAN	A	2F4Y	A	A89S	1	108	108	2.2	2.15	0.599797	-0.205245		-0.986		2.101	1	1.34	Decrease	Decrease
2MGC	A	2MGF	A	L65Q	1	154	154	1.9	1.8	1.51505	-0.873582			-0.031	2.209	1.79	-0.36	Decrease	Decrease
2I1B	A	1T4Q	A	F101W	1	153	153	2	2.1	-0.0416548	1.66544	3.702	-1.44	5.328	4.319	1.15	1.48	Decrease	Decrease
1B5V	A	1LZS	A	A51S	1	130	130	2.17	1.6	-0.317528	0.857513	0.988	0.129	-2.044	4.123	1.02	1.33	Decrease	Decrease
1D4N	A	1A8E	A	E205H	1	329	329	2	1.6	2.01641	-2.23042					0.95	0.94	Decrease	Decrease
5EU2	A	5EET	A	F99V	1	148	148	2	2	1.95815	-2.00678					1.06	1.69	Decrease	Decrease
3A1R	A	3RSD	A	D121N	1	124	124	1.7	1.6	0.502129	0.129677	-2.226	1.617	-2.137	3.011	0.9	1	Decrease	Decrease
3FE0	A	1GFT	A	V110Y	1	130	130	1.5	1.8	-0.6117	0.957838	0.56	-1.591	1.55	0.177	0.44	0.06	Decrease	Increase
1KB3	A	3BAI	A	A194R	1	495	495	2.1	1.9	0.0889073	3.55554	2.206	0.054	9.949	2.279
1M6C	A	1MWC	A	N68V	1	153	153	1.9	1.7	-0.0216567	1.22941	-1.842	2.388	-0.38	1.855	-0.53	1.3	Increase	Decrease
1L47	A	1LYD	A	E154R	1	164	164	1.7	2	-0.614199	1.31727	-2.429	0.107	0.063	2.796	0.19	0.75	Decrease	Decrease
1G4S	A	2TPS	A	A121S	1	226	226	1.7	1.25	-0.22207	0.221599					0.61	0.85	Decrease	Decrease
1GBW	A	1GBX	A	I110L	1	130	130	1.8	1.8	-0.0372218	0.239027	-0.228	0.042		-0.06	-0.12	0.37	Increase	Increase
1DKP	A	1DKM	A	A17H	1	410	410	2.28	2.25	1.71583	0.19498	1.513	3.572			0.79	0.74	Decrease	Decrease
3WW6	A	3WW5	A	D46E	1	129	129	1.53	1.53	-1.05654	0.734849	-0.822	0.088	-1.123	3.112	0.49	0.4	Increase	Decrease
2ABH	A	1QUL	A	D137T	1	321	321	1.7	1.7	4.36158	-0.720057	2.002	1.893	2.364	3.595	0.49	0.58	Increase	Increase
3WDW	A	3WDT	A	A115E	1	298	298	1.8	1.98	5.27137	-1.13608					1.15	0.71	Decrease	Decrease
1GBO	A	1GFV	A	G110N	1	130	130	1.8	1.8	-0.377417	0.0757555	-1.506	1.465	0.61		0.73	0.18	Decrease	Increase
3QMX	A	4MJB	A	A90S	1	99	99	1.82	2.11	-0.23993	0.569121			1.17	-0.482	0.74	0.53	Decrease	Decrease
3FQ2	A	3FQ1	A	F121I	1	128	128	1.91	1.9	1.42148	26.2325	1.684	36.056	10.17	13.012	0.59	0.54	Decrease	Decrease
3M08	A	3M09	A	F98Y	1	161	161	2.01	2.01	0.561455	0.521365	-1.071	1.742	2.38	1.19	1.25	1.05	Decrease	Decrease
1L50	A	1L49	A	C149V	1	164	164	1.85	1.8	-0.74623	2.45393	-0.682	4.342	4.899		0.61	2.27	Decrease	Decrease
1L02	A	1L11	A	A157L	1	164	164	1.7	1.7	0.0453035	0.737578	-0.174	0.791	-0.383	1.274	0.73	1.51	Decrease	Decrease
1YMW	A	1YMN	A	G92L	1	124	124	1.5	1.45	1.58842	0.96241	-1.024	3.788	6.635	4.24	0.66	2.2	Decrease	Decrease
5GHI	A	5GHM	A	D120N	1	156	156	1.21	1.5	-1.4655	1.59374	-1.966	1.462
1L27	A	1L28	A	D86G	1	164	164	1.8	1.9	0.0870435	0.561419	1.657	-1.671		0.377	1	1.14	Decrease	Decrease
1QSB	A	125L	A	C98S	1	162	162	1.8	1.85	1.50726	1.01585	0.099	-2.784	0.974	3.604	1.78	1.25	Decrease	Decrease
4B9O	A	1F98	A	T50V	1	125	125	1.6	1.15	0.724703	1.94893	4.721	-0.942	1.013	1.22	0.93	1.47	Decrease	Decrease
1QT3	A	219L	A	D26T	1	164	164	1.85	1.66	-5.33043	3.51956	-2.673	8.61	-5.163	8.083	0.36	1.04	Increase	Decrease
1FAE	A	1G9J	A	E44Q	1	629	629	2	1.9	1.4164	-0.812582	0.937	-0.533	5.048	-1.592	0.54	0.38	Decrease	Increase
3H57	A	2MGC	A	N69V	1	154	154	1.7	1.9	-0.0144777	0.457733			-0.491	4.012	-0.31	1.32	Increase	Decrease
1C97	A	5ACN	A	A641S	1	753	753	1.98	2.1	-0.267559	0.203388		-3.111
2D48	A	2B8U	A	D13T	1	129	129	1.65	1.8	-0.282907	3.39123	1.234	5.314	2.747	1.919	0.72	1.13	Decrease	Decrease
1L34	A	3CDQ	A	H96S	1	164	164	1.9	1.68	0.510648	10.3768	1.199	21.82	5.531	3.5	1.32	1.29	Decrease	Decrease
1CNI	A	5BNL	A	A89Q	1	257	257	1.8	2	-0.401848	0.0577155			0.477		1.27	0.64	Decrease	Decrease
1KGU	A	3BAI	A	A336R	1	495	495	2	1.9	-1.52422	1.48488	-1.212	0.101	4.639	2.465
1OUG	A	1GF9	A	A2Y	1	130	130	1.8	1.8	-0.0531182	0.344452	-1.273	1.053	-2.322	3.438	0.55	0.85	Decrease	Decrease
1CP5	A	1CO9	A	F105V	1	154	154	2.1	1.6	1.90598	-1.41717			1.495		0.94	1.14	Decrease	Decrease
2XKG	A	4AVD	A	A87L	1	110	110	1.6	1.5	-2.00773	3.05543			-3.738	5.007	-0.03	1.55	Decrease	Decrease
1EAX	A	3P8G	A	N158Q	1	241	241	1.3	1.2
3MYN	A	3MYM	A	D86E	1	137	137	2.19	1.72	1.64692	0.305657		-0.544		3.34	0.24	0.44	Decrease	Decrease
1OUC	A	1GBZ	A	A110F	1	130	130	1.8	1.8	-0.582473	0.615757	3.793	-3.008	0.368		0.08	0.51	Decrease	Increase
1GB9	A	1GFH	A	F74Y	1	130	130	1.8	1.8	0.795664	-0.281412	-2.226	1.899		0.333	0.5	0.34	Increase	Decrease
5BNL	A	1H9N	A	H116N	1	257	257	2	1.85	7.87627	-3.10287				1.155	0.97	0.94	Decrease	Decrease
1DTI	A	1CH9	A	D98Q	1	154	154	1.7	1.8	-0.564244	0.266927					0.38	0.36	Decrease	Decrease
3U47	A	5BNL	A	L139V	1	257	257	1.6	2					0.189		0.76	0.57	Increase	Decrease
1LYD	A	1L31	A	P86R	1	164	164	2	1.8	2.04773	3.21236	-3.872	25.998	0.581	5.661	1.04	0.6	Decrease	Decrease
2I9V	A	4B9O	A	Q98Y	1	125	125	2.2	1.6	0.030461	1.91487	-0.868	3.611	3.864	4.142	0.12	1.02	Decrease	Decrease
1GBY	A	1INU	A	M110R	1	130	130	1.8	1.8	0.111917	0.136389	2.762	-1.939	0.98	-1.546	-0.11	-0.09	Increase	Increase
2B6T	A	1L92	A	A99I	1	162	162	2.1	1.7	-0.939233	3.24499	-0.874	4.668	2.191	4.964	0.63	3.57	Decrease	Decrease
1L09	A	1L12	A	H157N	1	164	164	1.7	1.7	-0.189627	0.41627	0.526	4.04	1.029	2.157	0.57	0.94	Decrease	Decrease
4BVM	A	5N4M	A	I44N	1	133	133	0.93	1.59	4.4649	-3.79728			4.973
2MGJ	A	3NML	A	V65W	1	154	154	2	1.68	1.84249	0.724835			1.235	3.987	1.21	0.43	Decrease	Decrease
237L	A	219L	A	A149V	1	164	164	1.7	1.66	-2.03071	1.94484	-3.811	4.439	-0.729	3.166	0.65	2.34	Decrease	Decrease
3MSI	A	7MSI	A	H17Y	1	66	66	1.43	1.7	-0.474697	0.577532			-0.941		0.11	1.03	Increase	Decrease
2B6T	A	1QUO	A	E108V	1	162	162	2.1	1.9	0.76959	-0.158356	-2.333	4.715	2.147	1.59	-0.51	1.51	Increase	Decrease
109M	A	1MTI	A	F47L	1	154	154	1.83	1.9	0.542986	0.994749			8.229	12.206	1.14	1.04	Decrease	Decrease
3C8R	A	3CDT	A	G96N	1	164	164	1.8	1.63	1.38284	1.62064	-0.79	3.713	0.651	4.714	1.6	2.18	Decrease	Decrease
2EWU	A	2EWI	A	H20Y	1	107	107	1.1	1	-1.43916	1.56804	-2.444	1.705	0.757	4.823	0.62	1.54	Decrease	Decrease
4MJE	A	3QMX	A	L38R	1	99	99	1.2	1.82	-0.628383	0.436589	0.39		1.658	-1.524	1.02	0.22	Decrease	Decrease
7RNT	A	1BU4	A	W45Y	1	104	104	1.9	1.9	-0.707546	0.117806	-7.705	6.649			0.45	-0.06	Increase	Increase
1ZG6	A	1AXB	A	G45S	1	263	263	2.1	2	0.473303	0.392792					1.38	1.83	Decrease	Decrease
4FWZ	A	4LPI	A	H43Y	1	153	153	1.9	1.36	-1.83177	1.47176	-3.133	3.729	-2.81	3.354	0.03	1.29	Increase	Decrease
5CS7	A	4FXL	A	D77N	1	100	100	2.1	1.4	1.00525	-0.498226					0.35	0.23	Increase	Increase
1BB4	A	1BB3	A	H109W	1	130	130	2.23	1.8	-0.00919704	3.81055	6.908	-0.618		7.364	0.47	1.57	Decrease	Decrease
2NZM	A	2BSP	A	A279K	1	399	399	1.8	1.8	1.39763	0.619585	1.756	0.244	10.116	1.516	1.63	1.6	Decrease	Decrease
1GFE	A	1GF8	A	N2S	1	130	130	1.8	1.8	2.2799	-1.54248	2.6	-2.15	0.714	-0.382	0.16	0.32	Decrease	Increase
2MEG	A	2MEI	A	S59Y	1	130	130	1.8	1.8	3.48628	5.32943	1.81	9.241	6.199	10.285	0.52	1.55	Decrease	Decrease
1C96	A	1C97	A	A529D	1	753	753	1.81	1.98	0.0678749	0.0296656					0.87	0.42	Decrease	Decrease
1GBY	A	1GFT	A	M110Y	1	130	130	1.8	1.8	-0.00614056	0.562261	2.452	-2.28	0.708	0.847	0	-0.14	Increase	Increase
1C8W	A	3A1R	A	G45T	1	124	124	1.8	1.7	-2.0989	3.26252	-2.591	7.877		5.873	1.39	2.49	Decrease	Decrease
109M	A	1CP0	A	L105N	1	154	154	1.83	2	2.70519	-1.3352			4.629		2.48	-0.61	Decrease	Increase
109M	A	1CH5	A	H98V	1	154	154	1.83	2.1	-0.819095	1.4089			4.592		0	1.5	Increase	Decrease
4X6U	A	4X71	A	A266T	1	392	392	2.2	2	2.50751	-0.0486116					0.95	1.14	Decrease	Decrease
1WQQ	A	3FE0	A	F54Y	1	130	130	1.8	1.5	-0.437827	1.39942	-4.079	4.328	1.53	2.804	0.93	1.06	Decrease	Decrease
3CHY	A	3OLX	A	A87S	1	128	128	1.66	2.1	0.0338665	-0.299513			-0.254	-0.255	0.67	0.19	Decrease	Decrease
1I3I	A	1BU4	A	T78V	1	104	104	1.76	1.9	-2.55238	2.74127	-4.228	3.558	-3.48		0.77	1.48	Decrease	Decrease
1MLF	A	1MLM	A	A69I	1	154	154	2	1.8	-0.65916	1.51431			-2.342	3.657	-0.23	1.35	Increase	Decrease
2CL2	A	2WLQ	A	E115S	1	298	298	1.35	1.4	-1.38952	1.53474	5.244	0.343	0.753	8.64	0.58	0.79	Decrease	Decrease
1GB9	A	1GFK	A	F74N	1	130	130	1.8	1.8	1.5361	-0.684521	-0.805	-0.053		-0.578	0.94	-0.25	Decrease	Increase
1AXQ	A	1GAO	A	L44S	1	106	106	2.1	2.2	1.18565	-2.28018	3.403	-1.724			1.16	0.75	Decrease	Decrease
1L14	A	1LYD	A	S157T	1	164	164	1.7	2	-0.59873	-0.338022	-0.948	0.956	-0.134	1.924	0.3	1.11	Increase	Decrease
7AME	A	1AME	A	A16T	1	66	66	1.7	1.65	-0.118742	0.7167			1.166	0.31	1.3	1.08	Decrease	Decrease
1QGY	A	1E62	A	E67R	1	295	295	1.7	2.3	-0.00786825	-0.124383			0.335		0.45	0.55	Decrease	Decrease
5BNL	A	4QK1	A	K166P	1	257	257	2	1.6						8.258	0.04	0.8	Increase	Decrease
3VZK	A	3VZL	A	E35H	1	185	185	1.55	2	-1.2475	2.41774	-0.51	0.478	0.291	8.444	0.11	0.34	Increase	Increase
5LQ9	A	3INW	A	M1V	1	207	207	1.9	1.95	0.845502	-0.910803				0.553
5JGU	A	219L	A	C119R	1	164	164	1.47	1.66	-0.274187	0.239668	-0.612	-0.76		0.673
4N0K	A	3TYI	A	E18R	1	108	108	1.05	1.4					0.187	0.583	0.01	0.36	Decrease	Decrease
4EFG	A	4EDE	A	A33W	1	133	133	1.58	1.4	7.7105	3.90006	2.261	-1.91	-3.887	8.683	0.55	1.66	Decrease	Decrease
1MWC	A	1MYI	A	K45S	1	153	153	1.7	2	0.824927	-1.6308	-0.885	0.326	0.353	0.522	0.6	0.66	Decrease	Decrease
1T7Q	A	2H3P	A	A539F	1	599	599	1.8	2.2	0.102469	4.43259			-1.27	9.886	1.15	1.85	Decrease	Decrease
2PD5	A	4GCA	A	I47V	1	315	315	1.6	0.9	0.931074	0.689504	0.294	3.034	1.25	2.604	0.51	0.02	Decrease	Increase
5MSI	A	4MSI	A	C17T	1	66	66	1.6	1.6	0.222455	-0.317966				0.76	0.46	0.74	Decrease	Decrease
1GFU	A	1GFV	A	D110N	1	130	130	1.8	1.8	0.931247	-0.742889	-0.314	-0.092	0.236		0.12	-0.1	Increase	Increase
5TH4	A	5BNL	A	G194L	1	257	257	1.47	2
2MEA	A	3FE0	A	F56I	1	130	130	2.2	1.5	4.2205	6.74766	-1.581	15.073	6.203	5.998	-0.04	1.75	Increase	Decrease
1MLQ	A	2OH9	A	L69W	1	154	154	2	1.8	-1.01187	4.12995			-1.937	1.113	1.13	0.45	Decrease	Decrease
1C8Q	A	1Q4N	X	F255W	1	495	495	2.3	2.07	-0.0778929	-0.308461	11.089	-10.777		2.649
3FQ1	A	3FPY	A	I121L	1	128	128	1.9	2.1	2.04832	5.20989	4.615	5.17	5.717	7.53	0.05	0.78	Decrease	Decrease
3LPC	A	3LPA	A	R91Y	1	340	340	1.7	2	0.627109	0.320875					0.12	0.06	Increase	Decrease
1L26	A	1LYD	A	C86P	1	164	164	1.7	2	-0.243054	2.73222	13.432	-15.876	5.165	-0.554	0.58	1.33	Decrease	Decrease
3B87	A	3B86	A	A57S	1	124	124	2	2	0.938594	-0.428549	0.14	-2.671	1.671	-0.549	0.99	0.34	Decrease	Decrease
2ABH	A	1QUK	A	D137N	1	321	321	1.7	1.7	3.23837	-3.22208	3.879	-0.07	2.597	1.704	1	0.52	Increase	Increase
2MEE	A	2MEF	A	L59M	1	130	130	1.8	1.8	0.300157	-0.147545	2.503	-1.261	3.124	2	1	0.83	Decrease	Decrease
1L07	A	1L08	A	F157G	1	164	164	1.7	1.7	0.552335	0.218113	-0.569	1.46	1.278	0.116	1.82	0.55	Decrease	Decrease
1CVD	A	1H9Q	A	C115Q	1	255	255	2.2	2.2	2.16316	2.21448				6.578	0.8	0.71	Decrease	Increase
3S3I	A	1OVE	A	C159S	1	349	349	1.8	2.1	0.523174	0.181845			0.184	-0.73	1.25	0.65	Decrease	Decrease
2NLS	A	1IJV	A	E31K	1	36	36	0.98	1.2	-0.000908763	-0.0607375	3.659	-1.348	-0.9	1.444	0.85	0.55	Decrease	Decrease
4JB4	A	3M23	A	N181R	1	291	291	2.39	1.4	1.20819	0.0561605			1.059	1.919	0.09	1	Decrease	Decrease
3RYV	B	5BNL	A	G6K	1	257	257	1.2	2	-0.377739	0.441189			-0.803		0.46	0.39	Decrease	Increase
3F8Y	A	2C2S	A	K35Q	1	186	186	1.45	1.4	-1.55707	1.62346	-1.738	0.944	-1.499	3.867	0.52	0.89	Increase	Decrease
2BS8	A	2BS7	1	C110S	1	176	176	2.25	2.1	4.55982		1.911	-2.58	-0.181	0.774	0.46	0.53	Increase	Increase
3FE0	A	2MEE	A	I59L	1	130	130	1.5	1.8	-0.297732	1.84577	0.23	2.338	6.501	0.55	0.75	0.8	Decrease	Decrease
1R1N	A	1O7T	A	I187V	1	309	309	1.74	1.65	0.744434		1.092	-1.409	1.858	-0.842	0.89	-0.07	Decrease	Decrease
1CM2	A	1POH	A	D15H	1	85	85	1.8	2	2.20058	-2.31172	1.999	-1.878		3.817	0.06	0.13	Decrease	Increase
1UID	A	1UIF	A	F15V	1	129	129	1.95	1.85	4.08244	-0.686234	2.948	0.663	5.755	0.27	1.08	0.91	Decrease	Decrease
1ZU3	A	1SN1	A	A8K	1	64	64	1.33	1.7	-0.757474	1.6202	4.871	-0.448	0.164	0.448	1.12	1.21	Decrease	Decrease
1BC0	A	1A8A	A	A184W	1	318	318	2	1.9	-0.130842	0.244806			2.068	-0.901	0.07	0.07	Increase	Decrease
1BOQ	A	2ALP	A	I119V	1	198	198	2.1	1.7	0.96942		-0.316
2IAR	A	2IAU	A	H242Y	1	312	312	1.9	2	0.122242	1.65221			4.055	2.274	-0.02	0.64	Increase	Increase
1AKW	A	1AKT	A	L60N	1	147	147	1.75	1.8	1.61325	-1.14641			5.313	1.998	1.36	-0.11	Decrease	Increase
1GB5	A	1GFR	A	G74R	1	130	130	1.8	1.8	-1.26207	0.250008	-1.121	1.967		1.8	0.62	0.53	Decrease	Decrease
4IT8	A	104M	A	H29L	1	153	153	1.5	1.71	-1.42861	1.20779	-1.359	2.203	-1.875	5.75	-0.11	2.45	Increase	Decrease
2IAR	A	1E1A	A	H242W	1	312	312	1.9	1.8	0.975961	2.16436			7.123	0.599	-0.01	0.66	Increase	Increase
1KGE	A	1BLH	A	M137N	1	257	257	2	2.3					0.832		1.66	0.39	Decrease	Increase
1PAM	A	1V3K	A	F283Y	1	686	686	1.8	2	-0.0436357	2.84104	-1.652	3.036	-0.836	1.681	1	0.67	Decrease	Decrease
3DHJ	A	3EKC	A	C61V	1	100	100	2	1.8	1.8529	-1.19873					0.39	1.61	Decrease	Decrease
5BMG	A	2GI9	A	C15E	1	56	56	2.2	1.14	-0.579978	0.138637	1.222	-1.426		-0.555	0.12	-0.12	Increase	Increase
5C1C	A	5C1E	A	D56N	1	299	299	1.8	1.75	-0.277394	0.176825					1	0.46	Decrease	Decrease
1AME	A	1EKL	A	E36K	1	66	66	1.65	1.65	-0.852375	0.815234			-0.545	0.568	0.75	0.3	Decrease	Decrease
1CNK	A	5BNL	A	L89Q	1	257	257	2.15	2	1.61515	-0.907564					1.75	0.07	Decrease	Decrease
3CDR	A	3FI5	A	Q96W	1	164	164	1.7	1.53	8.90741	2.24011	29.02	-4.819	6.45	4.697	0.67	1.97	Decrease	Decrease
2XJP	A	2XJV	A	D189T	1	258	258	0.95	1.74	0.0585164	-2.07984					0.25	0.14	Decrease	Increase
1UN4	A	5EOP	A	A79T	1	121	121	2.1	1.35		2.08688					1.29	2.3	Decrease	Decrease
2BQA	A	2BQE	A	I59V	1	130	130	1.8	1.8	1.08788	-0.396639	1.456	-0.727	1.772	1.659	1.19	0.17	Decrease	Decrease
1L10	A	1L11	A	I157L	1	164	164	1.7	1.7	0.516353	0.238956	1.958	2.072	0.906	0.614	0.24	1.04	Decrease	Decrease
3C8S	A	3C7W	A	E96K	1	164	164	1.68	1.77	1.21206	1.64516	3.369	-1.595	1.453	2.539	1.5	1.07	Decrease	Decrease
1L07	A	1L12	A	F157N	1	164	164	1.7	1.7	-0.128392	0.353676	-3.228	6.018	0.671	3.382	1.18	-0.08	Decrease	Increase
2NXR	A	5E2S	A	F5Y	1	258	258	1.7	1.5	0.943024	-0.903794			0.673		0.08	0.08	Increase	Increase
3HCX	A	1DY3	A	A10N	1	158	158	1.75	2	0.693613	2.70205	-0.164	3.838	2.977		1.28	0.94	Decrease	Decrease
1AXQ	A	1FRJ	A	F25I	1	106	106	2.1	2.3	2.53398	-0.157531	-0.28	3.223		4.518	0.87	1.2	Decrease	Decrease
3WW5	A	1LSY	A	E46N	1	129	129	1.53	1.9	0.436421	0.356024	-1.614	2.398	0.823	2.064	0.63	0.46	Decrease	Increase
4WWL	A	1HO5	A	C496I	1	525	525	2.23	2.1	-1.12206	0.948681					0.09	1.97	Decrease	Decrease
2MGA	A	1MOC	A	G65T	1	154	154	2.2	2	0.209256	1.25733			-0.106	2.539	0.64	2.11	Decrease	Decrease
1KXW	A	193L	A	D27N	1	129	129	1.96	1.33	1.13099	-0.592272	-0.021	3.036	2.23	2.888	0.85	1.03	Decrease	Decrease
2RN2	A	1KVB	A	D134H	1	155	155	1.48	1.9	-1.03804	2.09372	-0.919	2.944	0.243	6.14	-0.44	0.6	Increase	Decrease
3P75	A	3C1F	A	D92K	1	129	129	1.9	2					7.57	3.381	0.58	1.27	Decrease	Decrease
1L09	A	1L15	A	H157V	1	164	164	1.7	1.7	-0.239234	0.0303158	-1.271	2.005	1.631	1.373	0.24	1.56	Decrease	Decrease
1DYF	A	3FA0	A	M131V	1	162	162	1.9	1.09	0.668291	-0.774018	0.641	-1.41		0.376	0.21	0.27	Decrease	Increase
2MEG	A	2MEH	A	S59T	1	130	130	1.8	1.8	-0.33805	1.13333	-0.331	2.675	-2.384	2.804	0.81	1.03	Decrease	Decrease
2OU9	A	3L2X	A	A119C	1	164	164	1.55	1.8	0.63941	-0.50617	-1.874	0.138	0.778	-0.522	0.7	0.5	Decrease	Decrease
5JGR	A	219L	A	C43K	1	164	164	1.46	1.66	-0.892955	1.15086	2.174	-1.596		2.887
102M	A	1MGN	A	A65Y	1	154	154	1.84	1.9	-0.703167	1.48771			-1.934	7.009	0.68	1.61	Decrease	Decrease
1GBJ	A	1P01	A	A138M	1	198	198	2	2
1LZS	A	1EQE	A	D120N	1	130	130	1.6	1.8	1.19458	-0.0901497	1.652	0.076	2.385	-0.188	0.69	0.31	Increase	Increase
1A6K	A	1A6G	A	D122N	1	151	151	1.1	1.15	0.237134	0.409415	-0.882	0.825	-1.345	2.754	0.08	0.24	Decrease	Decrease
1L07	A	1L15	A	F157V	1	164	164	1.7	1.7	0.273317	-0.044352	-3.951	4.838	-0.343	-0.401	1.22	1.04	Decrease	Decrease
2PQB	A	2GGD	A	A95G	1	445	445	1.8	1.7	1.14036	-0.911955			0.487	-2.323	2.54	1.28	Decrease	Decrease
5V8Q	A	2YHD	A	A175K	1	249	249	1.44	2.2	0.0402154	-0.256639				0.309
1DLR	A	1U71	A	F22R	1	186	186	2.3	2.2	-1.00356	-1.29867	1.504	-1.267		-3.689	1.13	0.6	Decrease	Decrease
1OUI	A	1GF4	A	A93T	1	130	130	1.8	1.8	0.605122	1.09894	0.837	-3.853	4.383	-0.531	1.13	1.6	Decrease	Decrease
1QTH	A	1QS9	A	M98V	1	162	162	1.9	1.85	1.74967	3.70022	7.144	-1.814	5.198	3.657	1.6	1.49	Decrease	Decrease
104M	A	5B84	A	I107Y	1	153	153	1.71	1.61	3.38346	0.833306	2.208	-0.793	2.336
1LZV	A	4KUV	A	H3Y	1	256	256	2.3	1.35	-1.70846	2.43915			-0.425	3.276	-0.36	0.6	Increase	Increase
4YGJ	A	5E2S	A	G7K	1	258	258	1.1	1.5	-0.250329	0.450331					0.55	0.76	Decrease	Decrease
3CDT	A	3CDO	B	N96V	1	164	164	1.63	1.87	-0.125202	0.139495	1.483	4.516	1.137	3.126	0.13	2.52	Increase	Decrease
1KVA	A	1KVC	A	A134N	1	155	155	1.8	1.9	-0.484237	1.58668	-1.296	0.373		-0.813	0.59	0.37	Decrease	Decrease
1G94	A	1JD7	A	K300R	1	448	448	1.74	2.25	0.656464	0.0772529	-3.39	-0.838	0.811	2.904	1.1	1.27	Decrease	Decrease
2MGF	A	1MOC	A	Q65T	1	154	154	1.8	2	1.04384	-0.363554			4.248	-2.92	0.17	1.22	Decrease	Decrease
2MGI	A	3NML	A	T65W	1	154	154	2	1.68	-0.397714	1.2601			-0.896	4.407	0.48	0.89	Decrease	Decrease
1UIC	A	1UIF	A	A15V	1	129	129	1.95	1.85	1.47271	1.70892	7.026	1.01	2.935	0.944	0.1	0.88	Decrease	Decrease
2FFN	A	2YXC	A	H25M	1	107	107	1.8	1.5	-0.695199	0.0667987	-1.374	1.443	3.573	1.174	0.46	1.89	Decrease	Decrease
1CH1	A	1CH3	A	G90W	1	154	154	1.9	2	-2.27848	4.27976			-4.589	9.271	0.37	1.77	Decrease	Decrease
3B7A	A	1OOF	A	A52S	1	124	124	1.9	1.49	0.827252	-0.776098	2.14	-1.269	3.911	-3.207	1.18	1	Decrease	Decrease
5KHZ	A	1QSB	A	A98C	1	162	162	1.49	1.8	3.0499	0.142788	3.987	-0.081		-1.492
3C8Q	A	3CDR	A	D96Q	1	164	164	1.64	1.7	-0.20763	3.89124	-3.422	4.516	-1.883	10.315	1.19	1.27	Decrease	Decrease
1TEF	A	1TEG	A	D8G	1	99	99	1.9	1.96	0.834146	-0.930941	2.808	-1.794	1.27	-0.865	0.26	0.71	Increase	Decrease
1V2U	T	1V2O	T	A154Y	1	223	223	1.8	1.62
1DJ1	A	1CCA	A	A45R	1	291	291	1.93	1.8	-1.30111	1.48849					0.38	0.75	Decrease	Decrease
1A8E	A	1OQG	A	D61E	1	329	329	1.6	1.9	2.16745	4.82575					0.82	1.01	Decrease	Decrease
1SAR	A	1LNI	A	C72T	1	96	96	1.8	1	-0.480997	-0.226602	0.917	-0.531	-0.581	1.959	0.51	0.51	Decrease	Decrease
3ILL	A	1DY3	A	A97D	1	158	158	1.73	2	1.35958	-0.608037	2.072	-1.951	3.713		1.32	0.78	Decrease	Decrease
1TAY	A	1D6P	A	A63L	1	130	130	1.7	2.23	-1.37118	1.51613	-1.269	2.048	-0.773		0.68	1.52	Decrease	Decrease
1CDG	A	1KCL	A	G179L	1	686	686	2	1.94	3.46992	-3.42866	0.415	-1.134		-3.517	0.42	1.83	Decrease	Decrease
1UIC	A	1UID	A	A15F	1	129	129	1.95	1.95	-0.720994	2.70424	2.595	0.476	5.396	3.438	0.37	1.8	Decrease	Decrease
1GAY	A	1GAZ	A	G2I	1	130	130	1.8	1.8	-0.579102	0.808558	-4.918	5.509	-2.595	3.524	0.49	1.6	Decrease	Decrease
4RMU	A	5CSB	A	E77N	1	100	100	1.4	1.72	2.41495	0.268079					0.4	0.13	Decrease	Increase
4KO7	A	4KOB	A	F48W	1	128	128	2.07	1.87	-1.05972	1.60179	0.731	2.007	1.969	2.364	1.2	1.06	Decrease	Decrease
5E2S	A	3DVC	A	N60T	1	258	258	1.5	1.6	2.68785	0.643471				2.236	-0.1	0.52	Increase	Increase
1MUA	A	3M1K	A	A198P	1	256	256	1.7	1.35		3.74335			6.137	2.568	0.19	0.96	Increase	Decrease
3C8Q	A	3C8R	A	D96G	1	164	164	1.64	1.8	-0.811602	2.89887	2.248	2.243	-0.395	5.151	1.98	1.69	Decrease	Decrease
4FRU	A	4FRV	A	G8R	1	185	185	1.1	1.1	12.9901	1.66963			17.351	3.026	0.77	1.08	Decrease	Decrease
5FEN	A	4RUU	A	C53T	1	133	133	1.55	1.4	-0.555635	-0.151308	1.174	-0.761		0.325
1KOK	A	5EJT	A	N184R	1	294	294	1.7	1.55	0.375656	0.687526	-1.45	0.355	0.85		-0.02	1.03	Decrease	Decrease
4FLO	A	4FLR	A	C290L	1	628	628	2.2	2.4	-1.86346	2.25869	-2.982	4.746	-0.008	4.536	0.07	2.23	Decrease	Decrease
3AWQ	A	3VM4	A	F70L	1	407	407	1.9	1.94	0.389159	0.201746			2.839	-0.342	0.86	1.13	Decrease	Decrease
2C2S	A	1DLS	A	L22Y	1	186	186	1.4	2.3	0.213874	0.287352	-0.517	-0.313	0.191		1.12	0.83	Decrease	Decrease
3FE0	A	2MEI	A	I59Y	1	130	130	1.5	1.8	9.07034	3.73958	12.496	4.054	13.763	7.261	1.8	0.53	Decrease	Decrease
106M	A	2OH9	A	F69W	1	154	154	1.99	1.8	0.683287	1.62749			1.196	-1.374	0.57	0.81	Decrease	Decrease
2IAW	A	2GVX	A	D227N	1	312	312	1.74	2	-4.58068	2.35206			-1.834	7.606	0.58	0.64	Increase	Decrease
4AVO	A	4B4F	A	A136D	1	420	420	1.8	2.2	1.43189	-0.482699					1.27	0.67	Decrease	Decrease
2X80	A	2BMH	A	A87F	1	455	455	2.3	2	-1.08724	1.81044	0.694	0.378	-2.487	6.288	0.13	1.23	Increase	Decrease
3RYM	A	1AAJ	A	K98M	1	105	105	1.7	1.8	-0.959254	3.79231	-5.791	12.206	-0.274	9.026	0.28	1.26	Increase	Decrease
193L	A	1IR9	A	I98M	1	129	129	1.33	1.9	-0.0716751	0.0689129	1.669	-0.351	2.928	0.84	1.4	0.75	Decrease	Decrease
1GB5	A	1GB8	A	G74M	1	130	130	1.8	1.8	-1.02152	0.865464	-2.972	3.727		0.516	0.45	1.08	Decrease	Decrease
5HS1	A	5ESE	A	G67R	1	528	528	2.1	2.2	-1.67856	1.52589					0.82	1.59	Decrease	Decrease
2WUT	A	4A1Y	A	K67Q	1	133	133	1.85	1.2	0.450436	-0.686337			0.762	-0.28	0.62	0.55	Decrease	Decrease
1RMZ	A	5I43	B	E115Q	1	159	159	1.34	1.95	-1.13904				3.9		0.48	0.42	Decrease	Decrease
4HP5	A	4HOW	A	A254E	1	559	559	2	1.7	-0.465998	1.4916			15.357	0.197	1.01	0.56	Decrease	Decrease
1GB5	A	1GB6	A	G74I	1	130	130	1.8	1.8	0.355656	0.726839	0.622	2.614		1.155	0.59	1.51	Decrease	Decrease
1FAE	A	1F9D	A	E55Q	1	629	629	2	2.3	0.210023	0.889247	-0.145	-2.051		6.517	0.6	0.37	Decrease	Increase
2RN2	A	1RBR	A	H62P	1	155	155	1.48	1.8	-0.300915	1.47555	-0.206	2.279	1.116	2.159	-0.64	1.27	Increase	Decrease
2FFN	A	2EWI	A	F20Y	1	107	107	1.8	1	0.408168	-0.418889	-1.884	1.243	1.33	1.425	1.19	0.92	Decrease	Decrease
2HEE	A	2MEG	A	G59S	1	130	130	1.8	1.8	0.313409	0.256374	1.063	0.995	2.936	3.719	1.13	1.59	Decrease	Decrease
5CSG	A	5CS7	A	Q98R	1	100	100	1.5	2.1	-0.350402	2.08098					0.22	0.75	Decrease	Decrease
3FA8	A	3D97	A	F134Y	1	137	137	1.78	1.5	-0.179089	0.553978	-0.103	4.739	-0.697	3.802	1.12	1.14	Decrease	Decrease
1EWH	A	1E2V	A	N153Q	1	251	251	2.35	1.85	-0.802097	1.39503	-0.024	-3.323	2.863	5.622	0.85	0.83	Decrease	Decrease
2MHR	A	1A7E	A	L103N	1	118	118	1.3	1.8	2.73844	-1.14581	8.528	-4.411	5.253	-3.509	1.39	0.36	Decrease	Decrease
1GFJ	A	1GFH	A	D74Y	1	130	130	1.8	1.8	-0.100519	0.778434	-0.146	1.362	-2.788	3.295	0.15	0.64	Increase	Decrease
4JAC	A	3DR9	A	S56T	1	137	137	1.93	1.26	-0.570141	1.02605	-0.175		0.341		0.34	0.86	Decrease	Decrease
4A80	A	4A84	A	F30V	1	159	159	1.96	1.5	4.31071	10.1851	5.647	14.033	11.474	3.673	1.39	1.82	Decrease	Decrease
134L	A	1LZS	A	E115R	1	130	130	1.77	1.6	-1.31978	1.29838	-0.025	-1.525	-0.554	3.403	0.1	0.38	Decrease	Decrease
1KAB	A	1EY0	A	G111K	1	136	136	1.8	1.6	2.40933	0.802164			12.322		0.87	0.53	Decrease	Decrease
2NWF	A	2NUK	A	W110Y	1	141	141	1.1	1.2	0.94584	2.85809			5.532	2.475	0.85	1.07	Decrease	Decrease
1ERO	A	1FQG	A	E141N	1	263	263	2.1	1.7	0.685461	0.0500358					1.02	0.54	Decrease	Decrease
1GF4	A	3FE0	A	T93V	1	130	130	1.8	1.5	0.209348	1.75898	-5.613	2.688	-0.37	3.584	0.66	1.5	Decrease	Decrease
2QET	A	2QES	A	A211S	1	261	261	1.24	1.24	0.334229	0.381228	-1.527	-2.025	1.129	-0.783	1.27	1.13	Decrease	Decrease
1L42	A	1LYD	A	E16K	1	164	164	1.8	2	-0.192021	0.318985	0.678	-1.257		1.183	0.59	0.51	Decrease	Decrease
1QUD	A	1L93	A	G99M	1	162	162	1.75	1.8	-4.58306	5.3975	-10.249	9.677	-6.003	8.238	0.46	3.17	Decrease	Decrease
4QLE	A	5CCC	A	A14I	1	159	159	1.35	1.5	-2.33186	2.61751	0.758	5.82	4.66		-0.03	2.06	Increase	Decrease
1A2F	A	1CCA	A	K169M	1	291	291	2.1	1.8	0.236379	0.635102			-1.081		0.52	1.72	Increase	Decrease
1FLW	A	193L	A	A71G	1	129	129	1.81	1.33	-0.99157	1.86996	0.17	-0.077		2.523	0.73	0.54	Decrease	Decrease
3B0X	A	3AU2	A	A263K	1	575	575	1.36	1.4	-0.280578	0.198638	2.426	-2.031	-0.164	-0.062	0.73	0.2	Decrease	Increase
2NUK	A	2NVE	A	S108T	1	141	141	1.2	1.5	1.42125	1.20684			1.167	1.277	0.75	0.72	Decrease	Increase
1PAM	A	1V3J	A	F283L	1	686	686	1.8	2	1.03919	2.10136	11.49	-9.691	8.932	-1.648	0.71	1.24	Decrease	Decrease
1UIP	A	1A4M	A	E235H	1	349	349	2.4	1.95	-1.008	2.50648			3.275	9.574	0.77	0.86	Decrease	Decrease
1L27	A	1L32	A	D86S	1	164	164	1.8	1.7	-0.598313	-0.119801	-1.071	-0.626		1.027	0.7	0.46	Decrease	Decrease
5AEN	A	5NI6	A	D373N	1	608	608	1.86	1.54	-1.26806	1.61732
3MNJ	A	5E2S	A	E167K	1	258	258	1.75	1.5					-0.412		0.16	0.32	Increase	Increase
2D02	A	4B9O	A	Q52R	1	125	125	1.42	1.6	-0.597	2.86753	-1.668	3.136	4.101	0.973	0.35	1.13	Decrease	Decrease
1CP0	A	1CO9	A	N105V	1	154	154	2	1.6	-0.838966	2.4767					-0.32	1.86	Decrease	Decrease
219L	A	255L	A	D20N	1	164	164	1.66	1.8	0.329112	0.833261	0.029	-0.853	-0.777	1.2	0.52	0.46	Increase	Increase
3URC	A	2ALP	A	G132T	1	198	198	1.1	1.7
3N3G	A	1NPZ	A	S47T	1	217	217	1.6	2	-0.358916	0.123961	-0.6	-0.558	1.714	0.92	0.52	1.13	Increase	Decrease
5E2S	A	1UGD	A	A63S	1	258	258	1.5	2	-1.12284	1.04142				4.912	0.66	0.29	Decrease	Decrease
1GB6	A	1GFK	A	I74N	1	130	130	1.8	1.8	0.143508	-0.134887	1.574	0.247	1.19	-0.252	0.86	-0.4	Decrease	Increase
1FLA	A	1FLD	A	D57T	1	138	138	1.9	1.8	1.93867	-0.557009	1.478	-0.586	-0.339	2.59	-0.06	0.08	Increase	Increase
3Q7V	A	3UY6	A	N108V	1	252	252	2.1	2.1	0.47844	-0.629757			1.633	0.806	-0.24	1.43	Increase	Decrease
1GFA	A	1GF9	A	D2Y	1	130	130	1.8	1.8	-0.202896	0.393346	-1.675	1.302	-4.695	4.282	0.07	0.54	Increase	Increase
1LUE	A	1O16	A	A69S	1	154	154	1.7	1.95	0.274809	-0.589452			1.355	-1.993	0.62	0.14	Decrease	Decrease
2HEC	A	1YAO	A	A56V	1	130	130	1.8	1.8	-1.90916	2.27343	-2.801	3.61	-0.656	3.558	-0.1	1.3	Increase	Decrease
2IDQ	A	3RYM	A	A98K	1	105	105	0.9	1.7	4.99267	0.159953	11.93	-1.325	12.713	-0.808	0.75	1.05	Decrease	Decrease
3B86	A	1OOF	A	S57T	1	124	124	2	1.49	-0.0589404	0.347382	-2.048	2.373	-1.474	3.406	-0.03	0.84	Increase	Decrease
1N7X	A	1A8E	A	E43Y	1	329	329	2.1	1.6	-0.236594	1.81583					0.47	1.57	Decrease	Decrease
1GFV	A	1GFT	A	N110Y	1	130	130	1.8	1.8	-0.503116	1.22324	0.59	-0.14		0.491	-0.17	0.28	Increase	Increase
3C7W	A	3CDR	A	K96Q	1	164	164	1.77	1.7	0.868567	-0.64367	-2.52	4.189	-2.201	2.682	1.11	1.26	Decrease	Decrease
1GB8	A	1B7S	A	M74S	1	130	130	1.8	2	0.520471	0.197866	3.32	-2.949	0.53		0.63	0.2	Decrease	Increase
1GB6	A	1GFH	A	I74Y	1	130	130	1.8	1.8	-0.727806	0.634183	-0.201	1.087	-0.13	2.622	0.83	0.48	Decrease	Decrease
4H0J	A	4GYD	A	C58M	1	86	86	2	1.8	-1.86621	1.62992	-1.564	1.177	-2.31	2.491	0.07	1.34	Increase	Decrease
4TYX	A	4FWX	A	A92S	1	153	153	1.64	1.9	0.918192	-0.337413	2.129	-3.675		-1.332	0.82	0.53	Decrease	Decrease
2G6P	A	4U6W	A	F220M	1	304	304	1.9	1.83	-0.392471	0.746539			2.798		0.7	0.7	Increase	Decrease
1G3O	A	1AXQ	A	E19V	1	106	106	1.65	2.1	0.829454	1.27659	2.38	1.947	2.954		0.51	1.27	Decrease	Decrease
2MEC	A	1LOZ	A	M56T	1	130	130	2.2	1.8	4.02688	-3.29156	6.436	-5.648	3.928	-3.033	1.57	-0.03	Decrease	Increase
2OCG	A	2OCK	A	D103N	1	254	254	1.75	1.85	1.24556	-1.28931			-0.501	1.336	0.94	0.91	Decrease	Decrease
1AKW	A	1AZL	A	L60V	1	147	147	1.75	1.8	1.14453	-0.97434			2.303	4.421	0.9	0.76	Decrease	Decrease
1FCS	A	2MGJ	A	R68T	1	154	154	1.6	2	-0.160747	-0.985454			0.652	1.76	0.37	0.17	Decrease	Increase
3UNS	A	1V2N	T	F205V	1	223	223	1.8	1.8
1GBX	A	1LHH	A	L110P	1	130	130	1.8	1.8	-1.42988	2.04641	2.706	-3.253	-0.239		0.57	0.02	Increase	Increase
1A8E	A	1N7W	A	L64W	1	329	329	1.6	2.2	-1.47282	1.53738					1.65	0.41	Decrease	Decrease
1L02	A	1L09	A	A157H	1	164	164	1.7	1.7	-0.49498	0.34204	-0.938	0.14	0.425	3.066	1.29	0.4	Decrease	Decrease
1GB8	A	1GFR	A	M74R	1	130	130	1.8	1.8	0.133953	-0.154383	1.647	-1.89	0.701	0.684	0.44	0.16	Decrease	Decrease
1GE2	A	3FE0	A	A78H	1	130	130	2	1.5	0.0223873	0.163466	0.319	-0.685		2.258	0.82	0.33	Decrease	Decrease
1GB2	A	3FE0	A	M2V	1	130	130	1.8	1.5	-0.387845	0.127012	-0.445	0.511	-0.852	1.303	0.22	0.64	Decrease	Decrease
1QGY	A	1E63	A	E67S	1	295	295	1.7	2.3	0.211902	-0.164308			-1.093		0.84	0.44	Decrease	Decrease
1CP6	A	3B3T	A	D118N	1	291	291	1.9	1.17	-2.61835	5.22902	-2.051	5.896		4.889	0.3	0.85	Increase	Decrease
1OUH	A	1GB9	A	A74F	1	130	130	1.8	1.8	-0.694268	1.64117	1.358	-1.8	-0.667		0.33	1.09	Decrease	Decrease
2EVK	A	1BZ6	A	G93H	1	153	153	1.4	1.2	3.24456	2.05556	3.917	3.523	0.357	4.174	1.36	0.98	Decrease	Decrease
4KO5	A	4KOC	A	L48W	1	128	128	1.79	1.46	13.4783	2.63638	14.653	0.881	13.542	8.044	1.39	0.79	Decrease	Decrease
109M	A	101M	A	F47V	1	154	154	1.83	2.07	3.49296	9.21785			6.719	10.677	1.08	1.02	Decrease	Decrease
4AI5	A	4AIA	A	F18Y	1	188	188	2.22	1.8	0.694174	-0.772434			3.234	-1.326	0.24	0.2	Increase	Decrease
3F8V	A	3FI5	A	H96W	1	164	164	1.08	1.53	-0.561145	2.15006	4.614	-2.616	-2.192	3.221	0.76	2.1	Increase	Decrease
1QUD	A	1L92	A	G99I	1	162	162	1.75	1.7	-2.74883	4.80226	-8.305	10.112	-3.599	8.556	0.37	3.56	Decrease	Decrease
3C7Z	A	3C83	A	H96R	1	164	164	1.67	1.84	-0.485315	8.38694	-1.807	20.337	1.763	8.926	0.82	1.78	Decrease	Decrease
219L	A	2Q9D	A	A41C	1	164	164	1.66	1.4	0.54153	-0.609672	-0.288	0.439	0.854		0.78	0.78	Decrease	Decrease
1GB5	A	1GFH	A	G74Y	1	130	130	1.8	1.8	-0.826441	1.43992	-1.715	3.796		1.937	0.79	1.38	Decrease	Decrease
1L04	A	1L10	A	D157I	1	164	164	1.7	1.7	1.228	-0.367447	0.062	1.729	2.639	3.73	0.19	1.23	Decrease	Decrease
3OK0	A	1H6M	A	A35Q	1	129	129	1.82	1.64	1.03722	-0.326711	2.091	1.229	1.847	0.595	0.69	0.46	Decrease	Increase
1L31	A	1L32	A	R86S	1	164	164	1.8	1.7	0.962777	-0.307297	2.135	-1.558	0.556	0.336	0.98	0.35	Decrease	Decrease
1UD3	A	1UD2	A	H289N	1	480	480	2.15	2.13	2.65893	9.2026	2.008	3.478	9.957	1.49	1.46	1.65	Decrease	Decrease
1CZH	A	1CZL	A	G58N	1	169	169	1.86	1.8	1.89163	-1.40222	0.87	-0.194		1.667	0.6	0.45	Decrease	Decrease
109M	A	1CPW	A	L105W	1	154	154	1.83	2.2	0.19127	0.66216			5.766		1.43	0.51	Decrease	Decrease
219L	A	1ZYT	A	A82C	1	164	164	1.66	1.7	0.358561	-0.360447	-0.71	0.125	0.515		0.64	0.19	Decrease	Increase
1C92	A	1C90	A	A127Q	1	265	265	2.1	2.1	-0.431533	0.879249					0.55	0.44	Decrease	Increase
1CTQ	A	2RGC	A	Q61V	1	166	166	1.26	1.6	0.417585	0.694043	-3.122	3.254			-0.21	1.1	Increase	Decrease
1VEN	A	1VEO	A	E164F	1	516	516	2.02	2.12	-3.13	2.96825	-3.26	3.839	-2.968	8.471	0.21	1.46	Increase	Decrease
1WEG	A	1KG5	A	A142Q	1	225	225	1.8	1.35	0.752731	0.31166	3.313	-1.382	0.955	2.317	1.11	1.05	Decrease	Decrease
2MEF	A	2MEH	A	M59T	1	130	130	1.8	1.8	3.90319	-3.28596	6.45	-4.118	5.145	2.207	1.71	0.51	Decrease	Decrease
1B8L	A	1B9A	A	D101E	1	108	108	1.7	2	0.903182	2.38483	1.845	2.491	5.173		0.49	0.69	Decrease	Decrease
1FQE	A	1A8E	A	A204K	1	329	329	1.8	1.6	3.04432	0.0351277					1.15	0.88	Decrease	Decrease
3C7W	A	3CDV	A	K96M	1	164	164	1.77	1.73	0.347085	-1.02796	-3.537	4.218	-0.598	-0.146	0.17	2.28	Increase	Decrease
1RBS	A	2RN2	A	A62H	1	155	155	1.8	1.48	-0.0662816	0.333412	2.32	-3.376	-0.903	3.452	0.89	0.01	Decrease	Decrease
1L04	A	1L08	A	D157G	1	164	164	1.7	1.7	1.22672	-0.719011	2.933	-2.992	-1.096	2.71	0.86	1.36	Decrease	Decrease
1VA5	A	1DQY	A	G157S	1	283	283	2.02	1.83	2.79778	-1.96151			2.203		1.12	0.48	Decrease	Decrease
2MGF	A	3NML	A	Q65W	1	154	154	1.8	1.68	-0.345369	0.0740205			-1.387	2.72	-0.02	1.26	Decrease	Decrease
3CDR	A	3CDQ	A	Q96S	1	164	164	1.7	1.68	0.650697	2.73109	3.796	0.323	6.086	-0.195	1.34	1	Decrease	Decrease
5DCC	A	5D7H	B	D41E	1	352	352	2.45	2.49	0.172452						0.4	0.19	Increase	Decrease
1B9A	A	1B8R	A	A51D	1	108	108	2	1.9	7.24793	-3.29746	9.202	-0.994		6.039	1.12	0.7	Decrease	Decrease
2EWU	A	2YYW	A	H20M	1	107	107	1.1	1.33	-1.40703	2.18212	-2.091	2.186	2.328	-0.863	0.38	1.73	Decrease	Decrease
1BQE	A	1OGI	A	A152T	1	295	295	2.45	1.64	2.51373	0.295226				-0.081	0.7	1.41	Decrease	Decrease
4EFN	A	2RGC	A	L61V	1	166	166	2.3	1.6	1.62343	-1.12353	1.268	1.112			1.03	0.41	Decrease	Decrease
1L08	A	1L15	A	G157V	1	164	164	1.7	1.7	0.591349	0.508843	-3.794	3.516	-0.096	1.025	0.8	2	Decrease	Decrease
5ARB	A	5AQE	A	C211L	1	269	269	1.15	1.1							-0.14	0.89	Increase	Decrease
1L07	A	1L14	A	F157S	1	164	164	1.7	1.7	0.547507	-0.402944	-1.284	4.321	0.525	0.494	1.31	0.06	Decrease	Increase
1LZS	A	1CKH	A	T70V	1	130	130	1.6	2	2.03824	1.46953	-0.372	4.006	4.447		0.98	1.23	Decrease	Decrease
1GFK	A	3FE0	A	N74V	1	130	130	1.8	1.5	0.179227	0.238693	-0.084	1.924	0.025	2.977	-0.19	0.87	Increase	Decrease
2HED	A	2MEE	A	A59L	1	130	130	1.8	1.8	-2.77392	3.15636	-3.884	5.773	3.452	5.575	0.3	2.23	Decrease	Decrease
193L	A	1UIF	A	H15V	1	129	129	1.33	1.85	4.37884	0.257379	5.935	-0.43	2.376	1.856	-0.04	1.48	Increase	Decrease
4FWZ	A	4FWX	A	F33Y	1	153	153	1.9	1.9	0.96923	-0.918275	-2.057	2.275	1.745	-1.662	0.71	0.89	Increase	Increase
3FE0	A	1GFH	A	V74Y	1	130	130	1.5	1.8	-0.502854	0.544737	-0.499	0.029	-0.247	3.22	0.85	0.45	Decrease	Decrease
1LYD	A	1L32	A	P86S	1	164	164	2	1.7	2.68827	3.33388	-0.981	17.236	0.197	4.773	1.66	0.48	Decrease	Increase
3BIR	A	4BIR	A	N92Q	1	104	104	1.8	1.7	1.51176	-0.767767	-0.016	3.595	-1.608	3.07	0.68	0.27	Decrease	Increase
2IDR	A	2IDV	A	C75S	1	177	177	1.85	2.3	5.14592	-0.483719				-0.66	0.85	0.64	Decrease	Decrease
1UIC	A	1UIE	A	A15G	1	129	129	1.95	1.95	0.616405	0.298313	2.766	-1.12	2.366	-0.272	1.47	0.84	Decrease	Decrease
106M	A	109M	A	F69V	1	154	154	1.99	1.83	3.37232	-2.10931			3.924	-0.715	0.57	0.92	Decrease	Decrease
1L03	A	1L06	A	C157E	1	164	164	1.7	1.7	-0.596579	0.0741306	1.598	-2.04	2.304	-2.287	0.74	0.48	Decrease	Decrease
1LUE	A	1MLF	A	D65H	1	154	154	1.7	2	-0.475456	0.420059			-3.211	5.018	0.36	0.43	Decrease	Decrease
4E3I	A	1L0E	A	K64Q	1	358	358	1.6	1.9	1.31097	0.813503			-3.135	12.916	0.58	0.37	Increase	Increase
1XF8	A	1NE9	A	F254Y	1	335	335	1.9	1.7	1.51034	-0.693082	-1.931	1.785		0.582	0.65	0.74	Decrease	Decrease
3NP3	A	3FPY	A	E121L	1	128	128	2.1	2.1	-2.46587	5.00626	11.272	8.108	11.752	8.5	-0.51	1.45	Increase	Decrease
1L06	A	1L13	A	E157R	1	164	164	1.7	1.7	-1.04946	-0.176002	-0.857	1.453	-1.35	2.14	0.19	0.81	Decrease	Decrease
5JEH	B	5JGT	B	F129Y	1	259	259	1.13	1.1	0.456786	-0.413429
3MNI	A	5E2S	A	D167K	1	258	258	1.75	1.5					-1.647		-0.06	0.47	Increase	Decrease
5B5L	A	5B5S	A	A10S	1	207	207	1.4	1.5	1.69586	-0.449182	4.931	-2.213
5CCC	A	4QLG	A	I14V	1	159	159	1.5	1.5	0.288767	-0.811192	2.075	-0.147		7.171	0.45	0.14	Decrease	Increase
5V71	A	4TQ9	A	C13V	1	169	169	2.23	1.49	-0.357778	0.0148405
1LI0	A	5HVI	A	I44M	1	263	263	1.61	1.64	0.0206524	3.91568
3HXZ	A	3HXU	A	A237G	1	441	441	1.99	2.1	0.952572	0.250224	-0.044	0.918	2.115	1.108	1.59	0.38	Decrease	Decrease
2WYK	A	2WX9	A	A11N	1	308	308	1.5	1.37	1.65796	-0.984666	7.082	-1.731	0.73	0.165	0.71	0.61	Decrease	Decrease
1LZS	A	1CJ9	A	T40V	1	130	130	1.6	1.8	-1.08967	1.01043	2.062	1.465	4.306		0.4	1.37	Decrease	Decrease
1UIE	A	193L	A	G15H	1	129	129	1.95	1.33	2.87136	3.30802	5.323	5.024	-0.193	2.952	1.46	1.14	Decrease	Decrease
1L03	A	1L10	A	C157I	1	164	164	1.7	1.7	0.00272615	0.368403	2.588	0.749	1.114	1.331	0.48	1.28	Decrease	Decrease
1L08	A	1L10	A	G157I	1	164	164	1.7	1.7	0.246306	0.579769	-3.071	4.267	2.934	2.231	0.82	1.85	Decrease	Decrease
3ZK7	A	3ZK8	A	E174Q	1	278	278	1.69	1.65	-1.05318	2.4815			-2.406	2.421	0.79	0.59	Decrease	Decrease
1M2H	A	1M2G	A	A24S	1	249	249	1.8	1.7	0.289768	1.84954	1.793	-1.028	0.717		0.51	0.27	Decrease	Decrease
1T7A	A	1ZVE	A	D10G	1	66	66	1.5	1.7	1.42619	2.33738	4.001	3.555	0.534	9.183	1.45	1.51	Decrease	Decrease
1LHH	A	3FE0	A	P110V	1	130	130	1.8	1.5	2.1658	-1.89013	-3.558	3.695		0.235	0.41	0.23	Decrease	Increase
2ZP4	A	1KVW	A	N48Q	1	123	123	1.9	1.95	0.325013	1.28045	0.605	2.771	-1.085		1.49	1.02	Decrease	Decrease
2AT5	X	1SY0	A	T121V	1	184	184	1.22	1.15	0.00905258	1.74309	-2.681	4.053	-4.348	3.025	0.31	1.29	Increase	Decrease
3OLD	A	3BAI	A	M286V	1	495	495	2	1.9	1.22545	0.321477		1.238		-0.15
2HED	A	2MEH	A	A59T	1	130	130	1.8	1.8	1.24856	-0.100701	2.905	-0.056	-0.773	2.357	1.05	1.33	Decrease	Decrease
2EIE	A	1T2X	A	C383S	1	639	639	1.8	2.3	1.95015	-1.11928	2.72	-15.689		-1.624	0.49	0.51	Decrease	Increase
134L	A	133L	A	E115H	1	130	130	1.77	1.77	-0.767187	2.08727	2.229	1.647	-3.434	4.191	0.61	0.13	Decrease	Increase
3C8R	A	3CDV	A	G96M	1	164	164	1.8	1.73	-1.8879	1.29973	-3.895	5.646	-0.597	2.474	0.5	2.82	Decrease	Decrease
1C3F	A	1C93	A	E127Q	1	265	265	2.1	2.1	-0.448774	0.623799			-2.556	4.871	0.58	0.37	Decrease	Increase
1GE4	A	3FE0	A	A118N	1	130	130	1.8	1.5	-0.629926	0.718792	-0.756	0.466	-2.139	2.147	0.45	0.17	Decrease	Increase
5BNL	A	4L5V	A	F222L	1	257	257	2	1.63						-0.21	0.94	1.52	Decrease	Decrease
1ERO	A	1JWP	A	M157T	1	263	263	2.1	1.75	0.263407	0.249095					1.27	0.68	Decrease	Decrease
1L06	A	1L14	A	E157S	1	164	164	1.7	1.7	0.000770897	-0.0484382	-0.16	2.135	-1.578	1.961	0.55	0.73	Decrease	Decrease
2AC4	A	1DOZ	A	C182H	1	309	309	2.1	1.8	0.155824	0.404813			-1.637		1.04	0.84	Decrease	Decrease
1MPB	A	1ANF	A	R230W	1	370	370	2	1.67	0.22048	1.96837	2.091	2.468	0.225	9.729	0.19	1.37	Decrease	Decrease
3MSI	A	4MSI	A	H17T	1	66	66	1.43	1.6	0.28855	0.317359			1.705	1.147	0.29	1.28	Decrease	Decrease
2D54	A	1A8H	A	A225Y	1	500	500	2	2	0.105734	4.08371	4.361	5.95	-2.09	6.646	0.86	2.78	Decrease	Decrease
3CHY	A	3OLV	A	A87V	1	128	128	1.66	1.7	0.684453	-0.179415			0.701		0.18	0.54	Decrease	Decrease
3UNS	A	3PLB	A	F205I	1	223	223	1.8	1.18
2ACU	A	2ACQ	A	H48Y	1	315	315	1.76	1.76	-1.79408	3.30329	-2.832	6.051	2.419	6.668	0.11	1.67	Increase	Decrease
4YKM	A	4YKO	A	W32Y	1	137	137	1.58	1.57	0.966802	-0.775767	-5.049	5.022			1.1	0.91	Decrease	Decrease
1DYG	A	3FA0	A	E131V	1	162	162	2.1	1.09	0.168684	-0.239648	-1.215	0.917		1.319	-0.23	0.78	Increase	Decrease
3FA7	A	3D97	A	E59R	1	137	137	1.9	1.5	-1.13872	0.629947	-1.76	1.955	-0.466	0.764	-0.26	0.56	Decrease	Increase
3HLW	A	4PM5	A	A206V	1	263	263	1.5	1.26					1.993	6.05	-0.08	1.26	Increase	Decrease
1M2G	A	1M2J	A	H80N	1	249	249	1.7	1.7	2.08233	0.715977	3.024	-0.962		2.738	0.66	0.42	Decrease	Decrease
1UGE	A	1UGD	A	L63S	1	258	258	1.9	2	-0.558046	2.0417			1.811	3.52	1.23	-0.22	Decrease	Increase
1F2Y	A	1KAA	A	A108Y	1	136	136	2	1.9	-0.212711	0.293608			-0.901	1.65	0.82	0.64	Decrease	Decrease
1A2G	A	1CCA	A	H228M	1	291	291	2.1	1.8	-2.09349	5.65118			2.232		0.11	1.04	Increase	Decrease
3OK0	A	193L	A	A35E	1	129	129	1.82	1.33	0.374493	0.415409	2.393	-0.135	1.808	1.856	0.75	0.51	Decrease	Decrease
1T1G	A	1GT9	1	A32E	1	357	357	1.18	1.38	3.63787		1.462	1.011	6.084	-0.702	1.05	1.08	Decrease	Decrease
1L25	A	1L28	A	A86G	1	164	164	1.8	1.9	0.588588	-0.0681212	2.74	-3.032	1.202	-1.418	1.49	1.21	Decrease	Decrease
2D44	A	1WD3	A	A204E	1	482	482	2.3	1.75	8.8519	-5.57216					0.67	0.73	Decrease	Decrease
1L12	A	1L15	A	N157V	1	164	164	1.7	1.7	0.936491	-0.437953	1.115	1.467	1.389	0.599	0.2	1.3	Increase	Decrease
1TS2	A	2QIL	A	A128T	1	194	194	2.3	2.07	0.297485	0.781054	0.51	0.34	-0.101	1.154	1.15	2.08	Decrease	Decrease
2BQA	A	2BQD	A	I56V	1	130	130	1.8	1.8	1.62493	-1.20858	2.492	-1.192	2.877	0.217	1.33	-0.43	Decrease	Increase
4L1X	A	4L1W	A	L56V	1	325	325	2	2.2	1.97507	-0.00763263			1.416	5.893	0.9	0.75	Decrease	Decrease
1CP6	A	2ANP	A	E151H	1	291	291	1.9	1.9	-5.65923	10.2058	1.418	11.586		12.468	0.78	0.72	Decrease	Decrease
2MEE	A	1YAP	A	L59V	1	130	130	1.8	1.8	2.61621	-1.37686	4.111	-3.091	4.108	3.592	1.32	0.57	Decrease	Decrease
1NZD	A	1JG6	A	A100D	1	351	351	2	1.9	-0.97491	3.93811	-0.762	0.868	5.213	5.058	1.55	1.7	Decrease	Decrease
5BNL	A	5JN1	A	A62S	1	257	257	2	1.52	-0.615561	0.415277
1CAL	A	5JEP	B	A196S	1	258	258	2.2	1.19		0.31317
1EOF	A	1EOD	A	A71D	1	100	100	2.38	2.45	-0.100947	0.353991					0.45	0.43	Decrease	Decrease
1ETJ	A	1E67	A	E121M	1	128	128	2.3	2.14	3.53162	2.60997	4.259	4.109	-1.058	8.527	-0.44	1.14	Increase	Decrease
1NM9	A	1JXJ	A	A57L	1	495	495	2.1	1.99	-0.48409	1.47769	5.299	-12.017	11.704	3.679
4PZZ	A	4EPX	A	C40S	1	170	170	1.4	1.76	0.334465	0.264904			2.283	1.965	0.94	0.92	Decrease	Decrease
1KQY	A	1KR0	A	A127E	1	273	273	1.92	1.92	0.399615	-0.205983	-1.731	1.368	-0.056	1.707	0.51	0.05	Decrease	Decrease
3URD	A	3URC	A	A132G	1	198	198	1.08	1.1	1.29312		3.651		3.884
1GBO	A	1GBW	A	G110I	1	130	130	1.8	1.8	-0.797389	-0.117644	-1.375	2.588	0.067		0.28	1.06	Increase	Decrease
1GDW	A	3FE0	A	G21R	1	130	130	1.8	1.5	0.956719	0.349444	-1.581	1.647	3.537	0.133	0.44	0.8	Decrease	Decrease
2IAS	A	2IAR	A	F242H	1	312	312	2	1.9	0.723195	-0.478575			0.979	3.653	0.7	0.08	Increase	Increase
1L04	A	1L14	A	D157S	1	164	164	1.7	1.7	0.99689	-0.438131	2.727	1.832	-1.851	4.056	0.43	0.74	Decrease	Decrease
2P3J	A	2P3I	A	A38R	1	161	161	1.9	1.75	-2.5318	2.55772			0.92	0.396	0.42	1.25	Decrease	Decrease
3NLL	A	1FVX	A	A57N	1	138	138	2.4	1.9	-0.189119	0.190951	1.482	-0.562	0.521	-1.037	0.35	-0.23	Increase	Increase
3B87	A	1OOF	A	A57T	1	124	124	2	1.49	1.03724	-0.249242	-2.16	0.488	0.166	1.619	0.82	1.26	Decrease	Decrease
1H8V	A	1OA2	A	A34V	1	217	217	1.9	1.5	-0.700813	2.09733	-0.775	6.049	0.98	5.382
1EWF	A	1BP1	A	E185K	1	456	456	1.7	2.4	-0.21122	-0.0112705	0.887	-0.673	0.174	3.737	0.6	0.58	Decrease	Decrease
1GB3	A	1GAZ	A	F2I	1	130	130	1.8	1.8	-0.226488	0.747779	-3.245	11.875	0.568	0.797	0.51	0.47	Increase	Decrease
1L02	A	1L12	A	A157N	1	164	164	1.7	1.7	-0.890323	1.39193	0.977	3.78	0.233	1.904	1.12	0.71	Decrease	Decrease
1GT6	A	1DT5	A	A146S	1	269	269	2.2	2.4	1.26495	1.38839	1.548	-1.419		1.911	0.74	1.26	Decrease	Decrease
1GAZ	A	1GB2	A	I2M	1	130	130	1.8	1.8	0.58727	-0.746423	0.405	-0.13	1.33	-0.911	0.45	0.35	Decrease	Increase
3B44	A	3B45	A	A46W	1	180	180	1.7	1.9	-0.398959	2.15748			1.329	1.211	0.09	0.61	Decrease	Decrease
1FLY	A	193L	A	A102G	1	129	129	1.83	1.33	0.608803	3.19768	2.243	0.555	0.448	6.822	0.81	0.68	Decrease	Increase
3MWI	U	4DVA	U	N144Q	1	246	246	2.03	1.94
3AUB	A	3AUC	A	A32T	1	58	58	1	1.91	1.03844	-0.759382	3.206		2.21	0.854	0.75	0.69	Decrease	Increase
3FE0	A	2MEH	A	I59T	1	130	130	1.5	1.8	3.02472	-2.93299	6.116	-5.361		-3.863	2.25	0.41	Decrease	Decrease
5FB9	A	5FBG	A	D45N	1	267	267	1.5	1.97	0.504709	-0.0494779
4XQ1	A	4XPW	A	A114F	1	131	131	1.4	1.17	3.62646	5.15969	-4.214	5.31			0.79	2.41	Decrease	Decrease
1GB3	A	1GB0	A	F2L	1	130	130	1.8	1.8	-0.315033	0.245889	-1.222	2.741	0.452		0.59	0.74	Decrease	Decrease
4GCA	A	2PDK	A	L301M	1	315	315	0.9	1.55	-0.141057	0.286963	-1.438	0.239	0.506	-0.462	0.72	0.42	Decrease	Decrease
1DYM	A	2A39	A	A196E	1	397	397	1.75	2.2	3.45965	-2.17697	4.191	1.513		1.036
1BCY	A	1A8A	A	K71T	1	318	318	1.95	1.9	0.66032	-0.497682				2.757	0.17	0.55	Increase	Decrease
2MSI	A	4MSI	A	M17T	1	66	66	1.9	1.6	0.244238	-0.482371			0.966	0.36	0.79	0.37	Decrease	Decrease
1UGA	A	1UGC	A	F63H	1	258	258	2	2	1.21785	-0.520137			3.545	6.631	1.19	-0.21	Decrease	Increase
150L	A	1LYD	A	I6M	1	164	164	2.2	2	0.188665	3.59209	0.7	1.822	4.05	2.82	1.08	1.32	Decrease	Decrease
1LZS	A	1B7M	A	A96M	1	130	130	1.6	2.2	5.67981	3.51721	0.839	3.035	5.062	2.155	0.38	1.98	Decrease	Decrease
1NIS	A	1ACO	A	R646S	1	753	753	2.05	2.05	-13.4816	11.7773			-0.994	31.829	1.37	0.53	Decrease	Decrease
1V2J	T	1V2O	T	R154Y	1	223	223	1.9	1.62
1RGC	A	1RLS	A	K25Q	1	104	104	2	1.9	0.434359	-0.199373	-3.182	2.277	-0.827	1.038	-0.05	-0.54	Increase	Increase
3WP6	A	3WP4	A	A112E	1	228	228	1.43	1.27							1.18	1.19	Decrease	Decrease
1JIP	A	1Z8Q	A	S244T	1	403	403	2	2	-0.375067	0.507121			-0.723	2.328	0.63	0.82	Decrease	Decrease
1WCQ	A	2BER	A	F324G	1	601	601	2.1	1.8	5.24095	3.54586					1.96	0.81	Decrease	Decrease
1PI4	A	4E3I	A	A286N	1	358	358	1.39	1.6	0.674007	-0.55723			7.426	0.122	1.81	0.7	Decrease	Increase
1L33	A	1LYD	A	A131V	1	164	164	1.7	2	0.91406	-0.489725	-0.069	1.053	0.1	0.16	0.07	0.17	Decrease	Increase
1GVR	A	1VYS	X	W102Y	1	364	364	1.38	1.8	7.54132	7.3126	4.134	3.09	5.343	10.717	0.61	0.42	Decrease	Increase
2F4Y	A	1BSE	A	L87V	1	108	108	2.15	2	1.26872	0.721479	-3.644		4.824	7.815	1.55	1.09	Decrease	Decrease
5DG4	A	4QYP	A	L60Y	1	133	133	1.5	1.62	-0.0538968	2.32314	1.801	-0.063		3.966	1.07	1.19	Decrease	Decrease
1GFU	A	1GBX	A	D110L	1	130	130	1.8	1.8	1.86192	-0.054178	-1.404	1.045	0.024	0.991	-0.46	0.83	Increase	Decrease
1L10	A	1L13	A	I157R	1	164	164	1.7	1.7	-0.721632	-0.403677	0.63	1.176	-0.367	3.314	0.89	0.52	Decrease	Decrease
1BJE	A	1YMA	A	T64Y	1	153	153	1.8	2	-1.58439	2.04957	-0.235	1.509	-3.959	3.502	0.18	0.8	Decrease	Decrease
2G0R	A	1LTW	A	F30W	1	154	154	1.95	1.7	0.335758	0.458338			1.03	3.868	1.01	1.04	Decrease	Decrease
253L	A	254L	A	A20S	1	164	164	2	1.9	0.0199099	1.63918	0.204	0.872	-1.361	2.059	0.63	0.78	Decrease	Decrease
3K45	A	3D80	A	D104E	1	186	186	1.6	1.4	-0.468549	0.569082	0.385	1.48	0.011	-0.254	0.18	0.12	Decrease	Decrease
1GAZ	A	1GB0	A	I2L	1	130	130	1.8	1.8	0.239741	-0.1994	2.405	-0.373	2.985		0.05	0.88	Decrease	Decrease
2QXZ	A	2QY1	A	A8G	1	330	330	2.12	1.9	0.148272	2.67155					1.01	0.53	Decrease	Decrease
1LQX	A	1EHB	A	E43V	1	82	82	1.8	1.9	-0.674866	0.752626			0.371	1.982	-0.73	1.38	Increase	Decrease
1RGC	A	4BIR	A	H92Q	1	104	104	2	1.7	0.923405	0.790829	2.071	6.064	1.794	4.695	0.39	0.44	Decrease	Decrease
1D6Q	A	1EQ5	A	E102N	1	130	130	1.96	1.8	-0.46379	-0.122843	1.744	-0.606		1.767	0.7	0.36	Decrease	Increase
1LZS	A	1EQ5	A	D102N	1	130	130	1.6	1.8	0.898611	0.312536	-2.34	0.165	-1.397	1.419	0.92	0.39	Increase	Increase
1L12	A	1LYD	A	N157T	1	164	164	1.7	2	0.501416	1.44287	2.553	2.079	0.57	0.608	0.24	1.2	Increase	Decrease
2MEB	A	2MEC	A	L56M	1	130	130	1.8	2.2	-0.0606833	1.78723	1.242	2.641	4.675	2.439	0.89	0.4	Decrease	Decrease
1L17	A	1L18	A	V3Y	1	164	164	1.7	1.7	1.21608	1.17219	8.691	0.796	0.977	3.923	1.7	0.97	Decrease	Decrease
1OFJ	A	2MGC	A	H30L	1	154	154	1.8	1.9	-1.24818	1.77921			0.297	3.356	-0.2	2.6	Increase	Decrease
1INU	A	1GFT	A	R110Y	1	130	130	1.8	1.8	-0.285952	0.277506	-0.866	0.442	-2.079	1.842	-0.01	-0.13	Increase	Increase
1N42	A	1A8A	A	E148R	1	318	318	2.1	1.9	-0.28893	0.647076			0.733	-0.17	-0.07	1.01	Increase	Decrease
2IAS	A	1E1A	A	F242W	1	312	312	2	1.8	1.26885	0.180247			4.125	4.986	0.39	0.58	Increase	Increase
2RN2	A	1RBU	A	K95N	1	155	155	1.48	1.8	-0.974162	-0.0244107	-2.241	2.879	-0.923	1.023	-0.28	0.25	Increase	Decrease
3MNH	A	5E2S	A	A167K	1	258	258	1.65	1.5					0.883		0.32	0.18	Increase	Decrease
1I70	A	1LNI	A	F86Y	1	96	96	1.7	1	1.36292	0.768487	-1.835	-0.262	1.112	1.142	1.3	1.03	Decrease	Decrease
5WDP	A	1CTQ	A	A120L	1	166	166	1.35	1.26	-0.130662	0.519881	7.061	1.822
4Y9H	A	3HAR	A	I143V	1	226	226	1.43	1.7	0.86161	-0.648951				3.539	0.54	0.45	Decrease	Decrease
2MEH	A	1YAP	A	T59V	1	130	130	1.8	1.8	-1.8501	1.83216	-4.184	2.613	-1.655	4.217	0.65	1.45	Decrease	Decrease
1I3F	A	1BU4	A	S89V	1	104	104	2.35	1.9	-3.68111	4.4294	-7.475	6.593	-3.572		0.34	2.12	Decrease	Decrease
1L25	A	1LYD	A	A86P	1	164	164	1.8	2	0.830821	2.0146	19.657	-3.918	3.692	-1.276	0.62	1.43	Decrease	Decrease
1TCM	A	1CDG	A	A616W	1	686	686	2.2	2	2.10404	2.97985	2.68	-0.781	-3.071		0.38	1.05	Decrease	Decrease
1B7L	A	1GF0	A	L32S	1	130	130	1.8	1.8	4.33675	2.04305	7.971	-1.383	7.357	5.845	2.07	-0.7	Decrease	Increase
1DYC	A	3FA0	A	I131V	1	162	162	2.1	1.09	0.484709	-0.66131	0.749	-0.812		-0.312	0.13	-0.01	Decrease	Increase
1HQ0	A	1HZG	A	C147S	1	295	295	1.83	1.86	-0.44882	0.687242			2.071	1.535	0.83	0.75	Decrease	Increase
1I8V	A	1LNI	A	F80Y	1	96	96	1.25	1	-1.21439	1.01688	-4.817	4.628	-0.005	2.018	0.86	0.74	Decrease	Decrease
5EE8	A	3OPH	A	R139S	1	265	265	1.54	1.34	2.44565	-1.35963					0.84	-0.02	Decrease	Increase
5N4Q	A	4BVM	A	P52T	1	133	133	1.72	0.93	2.33053	2.87466				4.249
1UGA	A	1UGB	A	F63G	1	258	258	2	2	0.873831	2.59537			6.22	5.162	1.73	0.21	Decrease	Decrease
1L22	A	1LYD	A	G124K	1	164	164	1.7	2	0.439419	0.991986	2.569	-1.022	0.958	0.681	1.34	0.56	Decrease	Decrease
5HVI	A	5KKF	A	I236L	1	263	263	1.64	1.82
1S54	A	1S51	A	A20S	1	227	227	2.2	2	1.319	-0.904368			1.881	-1.857	0.73	0.36	Decrease	Decrease
1LOV	A	1BU4	A	A58E	1	104	104	1.55	1.9	0.7847	1.40008	1.404	0.389	0.707		0.75	0.88	Decrease	Decrease
1IP2	A	3FE0	A	A48G	1	130	130	1.8	1.5	0.320493	-0.270341	2.128	-2.55	-0.411		0.61	0.48	Decrease	Increase
1ERO	A	1LI9	A	M44V	1	263	263	2.1	1.52	3.5987	1.62048					1.22	1.24	Decrease	Decrease
1L29	A	1L32	A	H86S	1	164	164	1.7	1.7	-0.236923	0.0592114	0.087	-0.282	-0.851	0.019	0.61	1.05	Decrease	Decrease
1JKA	A	1D6P	A	D35E;Y63L	2	130	130	1.66	2.23	-0.617889	2.36768	0.914	3.796	-0.422
1CIK	A	2MGF	A	H65Q;A100I	2	154	154	1.7	1.8	-0.737459	3.61705			-2.63	6.525
4ZP9	A	4ZPC	A	A341G;I364F	2	462	462	1.8	1.59	0.682848	3.62821	6.482	6.655
1JKC	A	2MEI	A	I59Y;F109W	2	130	130	1.6	1.8	13.3844	4.86493	22.144	2.952	16.331	10.857
1OUG	A	1CJ8	A	A2V;T40A	2	130	130	1.8	1.8	-0.548348	0.356351	-2.299	2.757	-0.879
1L58	A	1L06	A	A143P;T157E	2	164	164	1.65	1.7	-0.225776	0.947715	7.983	-6.949		-0.723
1KBK	A	2CPU	A	A196D;D299N	2	495	495	1.9	2	-0.631826	-0.96966	-0.633	1.498	4.295	1.677
1GFE	A	1GB8	A	N2V;V74M	2	130	130	1.8	1.8	1.45368	0.441088	-2.404	5.017	-0.178	2.251
1IOS	A	1UIF	A	F12M;H15V	2	129	129	1.76	1.85	4.97015	0.508616	5.436	3.309	11.045	-2.661
2B6T	A	122L	A	A73S;A99L	2	162	162	2.1	1.8	-3.40016	3.37029	-3.998	6.118	-5.718	5.661
1GF7	A	1CJ9	A	T40V;T100V	2	130	130	1.8	1.8	0.901523	2.59015	-0.234	4.232	1.946
5JES	B	1UGF	A	A63T;T119V	2	258	258	1.21	2	-3.03213	1.16458				9.086
134L	A	2MEI	A	I59Y;E115R	2	130	130	1.77	1.8	10.7243	5.44973	14.899	3.61	13.51	9.422
1IP2	A	1TCY	A	A48G;Y63F	2	130	130	1.8	1.7	0.113469	-0.390508	5.654	-4.558	0.226	-0.069
4AME	A	2AME	A	N15Q;A19T	2	66	66	2.05	2	-0.00554718	-0.448324			1.843	2.176
1GB0	A	1WQP	A	L2V;Y45F	2	130	130	1.8	1.8	0.415032	0.0102703	0.944	0.392		0.48
1LHI	A	2MEG	A	I59S;G71P	2	130	130	1.8	1.8	12.3675	0.576493	19.53	-5.156	117.07	3.042
1GE2	A	1B7N	A	E35L;A78H	2	130	130	2	1.8	-2.03333	3.86161	-3.006	5.582		6.765
4LYW	A	5A5S	A	A1S;Q37K	2	127	127	1.95	1.36	-0.24726	0.445067			1.426
1B7Q	A	1I1Z	A	L27N;Q86D	2	130	130	2	1.8	2.03113	0.205288	3.948	-1.177		-3.574
1GB2	A	1GB8	A	M2V;V74M	2	130	130	1.8	1.8	-1.19026	0.804768	-0.76	3.287	-0.084	1.72
1IP1	A	1YAQ	A	A37G;I89V	2	130	130	1.8	1.8	-0.297512	2.08211	2.571	-1.099	0.26	12.371
1GE1	A	1GFU	A	A58Q;V110D	2	130	130	1.7	1.8	-0.0971324	1.67846	0.856	0.711	2.039	3.515
1CJ9	A	1EQ4	A	E7Q;V40T	2	130	130	1.8	1.8	1.63381	-0.91316	3.554	0.157
2MEA	A	1GB5	A	F56I;V74G	2	130	130	2.2	1.8	5.15324	5.49923	2.402	22.643	6.608
1B5Z	A	133L	A	A82S;R115H	2	130	130	2.2	1.77	-0.971742	1.3513	0.614	0.151	-2.483	3.231
4JAC	A	3MYN	A	S56T;M86D	2	137	137	1.93	2.19	1.9215	1.54774	1.108		3.615
1B5Y	A	1GF7	A	A36S;V100T	2	130	130	2.2	1.8	1.42756	2.28071	4.783	-4.062	2.032	1.339
1B5V	A	1I1Z	A	A51S;Q86D	2	130	130	2.17	1.8	-0.071706	1.33344	1.1	2.176	2.433	3.349
1G06	A	1ZYT	A	A82C;S149V	2	164	164	1.85	1.7	-2.2943	3.28858	-6.961	8.189
2HED	A	1LHI	A	A59I;P71G	2	130	130	1.8	1.8	1.59463	11.1742	-1.216	17.179	8.371	116.17
1GFK	A	1LHH	A	N74V;V110P	2	130	130	1.8	1.8	-1.7744	2.68842	2.576	-1.135	0.394
1WQP	A	2HED	A	F45Y;I59A	2	130	130	1.8	1.8	3.25815	-0.17268	4.002	-1.088	7.68	1.275
1IOS	A	1FLU	A	F12M;G67A	2	129	129	1.76	1.78	3.45336	-1.06582	1.366	4.967	10.502	-5.264
1GF3	A	1GF0	A	A32S;S92A	2	130	130	1.8	1.8	0.341398	-0.342161	-1.959	3.906		0.141
1B5V	A	1GEZ	A	A9S;A51S	2	130	130	2.17	1.8	1.34867	0.0174739	2.083	2.33	1.427	1.922
1WQM	A	1OUE	A	F124Y;V125A	2	130	130	1.8	1.8	2.25624	-0.782903	0.35	2.782	3.985	0.31
2MEE	A	1B7L	A	A32L;L59I	2	130	130	1.8	1.8	4.18415	3.20024	1.421	7.711	14.469	8.657
1EQE	A	1GF3	A	A92S;N120D	2	130	130	1.8	1.8	0.402151	0.380211	3.416	-1.713	3.726
1IP5	A	1GBO	A	A105G;V110G	2	130	130	1.8	1.8	-2.25093	3.09199	3.698	-2.914	-0.188	2.117
1GFA	A	1LHJ	A	D2V;P103G	2	130	130	1.8	1.8	1.12774	-0.441835	-5.767	6.499	-1.29	14.713
1P36	A	1QT6	A	E11H;V100I	2	164	164	1.45	1.9	1.25569	1.51124	-4.295	5.948	1.477	6.977
238L	A	1QUG	A	A103V;E108V	2	162	162	1.8	1.9	-1.15592	2.06506	-7.289	7.306	3.433	4.91
1MOB	A	2EB8	A	G65H;N123D	2	154	154	2.2	1.65	-0.256265	2.50667			1.066	7.075
1GF8	A	1DI3	A	S2V;R50G	2	130	130	1.8	1.8	-0.449917	2.84695	-4.164	6.407	-2.506
1CKC	A	1CKF	A	A43T;T52A	2	130	130	1.8	1.8	0.358806	2.21749	2.916	4.478	2.738
3CDV	A	1L98	A	M96R;Q105E	2	164	164	1.73	1.8	-1.10604	1.617	0.144	2.231	4.015	0.324
1GAY	A	1GEV	A	G2V;L8T	2	130	130	1.8	2.1	6.08851	-0.831421	3.903	2.735	7.627	-1.165
1B7S	A	1YAO	A	I56V;S74V	2	130	130	2	1.8	2.09954	-1.15292	1.255	0.817		0.848
2HED	A	1IP6	A	A59I;G127A	2	130	130	1.8	1.8	2.2835	0.58543	-0.965	5.23	5.493	5.19
1DTI	A	1CO8	A	D98H;L105A	2	154	154	1.7	1.8	2.72953	-1.94326
1CH7	A	1MGN	A	H65Y;F98H	2	154	154	1.9	1.9	-0.696493	0.799891			2.299	4.007
1L58	A	1L10	A	A143P;T157I	2	164	164	1.65	1.7	0.101549	1.67302	7.78	-2.635		3.927
1GB9	A	1IP5	A	F74V;G105A	2	130	130	1.8	1.8	4.48353	-1.44338	-0.208	4.345		-0.552
1TDY	A	1B5X	A	W63Y;S80A	2	130	130	1.7	2	0.703786	-0.214363	-5.871	8.26	1.454	0.127
1L20	A	1L24	A	A82P;D144N	2	164	164	1.85	1.7	0.878721	-0.862253	3.612	-3.521	-2.371
3CDR	A	1L11	A	Q96R;T157L	2	164	164	1.7	1.7	-0.210925	0.870554	0.539	-0.396	2.652	-0.18
1OUB	A	1GF3	A	A92S;A100V	2	130	130	1.8	1.8	2.30897	0.343681	6.038	0.364	7.512
1LHH	A	1YAM	A	I106V;P110V	2	130	130	1.8	1.8	4.28785	-3.02483	-1.478	2.174		-1.051
106M	A	1MTI	A	F47L;F69V	2	154	154	1.99	1.9	3.78484	-1.92911			10.893	4.296
1GFE	A	1TDY	A	N2V;Y63W	2	130	130	1.8	1.7	1.93263	-0.53129	5.96	-4.287	-0.647	1.682
3CDT	A	1L38	A	N96R;Q123E	2	164	164	1.63	1.8	-1.43525	0.714638	-2.39	4.134	1.216	6.673
1GFJ	A	2HEA	A	D74V;I106A	2	130	130	1.8	1.8	4.43104	-1.00286	9.698	5.547	4.118	3.315
1DTI	A	1CH3	A	L90W;D98H	2	154	154	1.7	2	1.118	1.84675				8.611
1D2Y	A	1QTB	A	A42V;M50I	2	162	162	2.06	1.9	5.52742	1.88671	14.374	4.613	18.159	3.852
1IP5	A	1YAQ	A	I89V;A105G	2	130	130	1.8	1.8	-0.630045	2.70469	2.157	-2.518	1.573	4.931
1IP3	A	1GB6	A	A68G;V74I	2	130	130	1.8	1.8	-1.22821	2.76168	-0.163	1.567	-1.516	2.889
1OUB	A	1INU	A	A100V;V110R	2	130	130	1.8	1.8	1.58046	2.39305	2.512	2.29	6.488	-0.611
1DI3	A	1D6P	A	G50R;Y63L	2	130	130	1.8	2.23	2.21418	-0.0532608	1.849	0.957
1B7Q	A	2HEE	A	L27N;I59G	2	130	130	2	1.8	6.29673	-2.42081	12.62	-3.434		0.224
1PXS	A	1S52	A	T20V;A52M	2	227	227	2.2	2.3	-0.103785	0.451186			2.282	4.477
129L	A	1QTB	A	A42V;T93A	2	162	162	1.7	1.9	3.06996	2.31657	3.329	4.917	16.456	-0.586
1IP5	A	1YAN	A	I23V;A105G	2	130	130	1.8	1.8	-1.04817	2.08468	2.567	-0.754	1.499	1.907
5JAV	A	3P75	A	D79Y;V92D	2	129	129	1.9	1.9						16.376
1WQQ	A	1OUC	A	F54Y;V110A	2	130	130	1.8	1.8	-0.659482	1.21376	-4.467	3.837	4.084	3.972
3DMV	A	1P64	A	A99L;L133F	2	164	164	1.65	1.62	-3.38523	4.16002	1.395	6.896	-3.537	11.53
1D6P	A	1IP6	A	L63Y;G127A	2	130	130	2.23	1.8	3.84307	-1.94001	-2.06	0.016		-0.394
1YMR	A	1A5Q	A	A92Y;P93A	2	124	124	1.5	2.3	1.40034	-1.09703	-0.696	-4.243	66.095
1CKC	A	1GE3	A	A43T;N118G	2	130	130	1.8	1.8	0.344023	2.74294	5.232	0.156	3.932	1.971
1INU	A	1YAO	A	I56V;R110V	2	130	130	1.8	1.8	1.57518	-1.90159	-0.509	-1.882	1.354	1.366
1UCJ	A	1I70	A	T36V;Y86F	2	96	96	1.81	1.7	0.102539	2.66547	0.014	2.09	4.139	4.554
3FA9	A	3CWK	A	T54V;D121E	2	137	137	1.94	1.6	-1.92095	2.97597	-3.656	6.711	-3.043	4.68
1MLM	A	101M	A	F47V;I69V	2	154	154	1.8	2.07	4.54139	7.61152			8.421	9.416
207L	A	1LHH	A	A77C;V110P	2	130	130	1.8	1.8	-1.76599	6.61885	3.095	-6.636	0.637
1G0P	A	1P6Y	A	M120Y;G149V	2	164	164	1.8	1.54	-3.57692	3.16584	-9.677	8.6	0.821	8.942
1OUG	A	2MEC	A	A2V;I56M	2	130	130	1.8	2.2	-0.0935058	2.2352	-1.855	3.433	0.855	3.888
1WQQ	A	1B5W	A	F54Y;S61A	2	130	130	1.8	2.17	-0.262849	0.625311	-3.313	3.656	3.26	3.457
1GB3	A	1GBW	A	F2V;V110I	2	130	130	1.8	1.8	-0.538391	1.08139	-3.029	7.863	0.961
1QGY	A	1QGZ	A	E67K;L70D	2	295	295	1.7	2.3	1.78162	-1.35731			3.801	-2.797
2CYH	A	2WLW	A	D65N;R68H	2	164	164	1.64	1.5	8.44117	1.35087			10.055	14.502
1CKF	A	1GB5	A	A52T;V74G	2	130	130	1.8	1.8	1.67652	1.18628	6.561	-0.297
1IP1	A	2HEF	A	A37G;I89A	2	130	130	1.8	1.8	1.75429	-0.0996107	6.069	-2.44	2.353	8.702
1L29	A	3C8R	A	H86P;R96G	2	164	164	1.7	1.8	2.2676	-0.600697	20.516	-6.535	11.496	-0.858
1B5U	A	1WQO	A	A24S;Y38F	2	130	130	1.8	1.8	-0.534059	0.241599	4.741	-2.734	-0.132	3.012
1OUH	A	1LHK	A	A74V;D91P	2	130	130	1.8	1.8	-0.281267	2.14522	6.125	-2.205	2.216	2.824
1L68	A	1QUG	A	A44S;E108V	2	162	162	1.7	1.9	0.415145	-0.685161	1.054	3.081	0.778	0.883
3MNI	A	1UGA	A	A63F;D167K	2	258	258	1.75	2					-2.326	9.315
3DV7	A	1UGE	A	A60N;A63L	2	258	258	1.7	1.9	1.33733	2.86309			0.937	3.931
1GBZ	A	1YAQ	A	I89V;F110V	2	130	130	1.8	1.8	2.05933	-1.33918	-2.117	2.834		3.616
1GE0	A	1CJ9	A	G38Y;T40V	2	130	130	1.8	1.8	-0.305334	3.05387	-3.371	8.382	0.575
1P2R	A	255L	A	D20N;V78I	2	164	164	1.58	1.8	-2.24884	2.33488	-2.684	0.97	0.767	4.939
2HEE	A	1GB5	A	G59I;V74G	2	130	130	1.8	1.8	-2.12053	4.90881	-0.53	10.463	-1.115
1WQN	A	1DI3	A	F20Y;R50G	2	130	130	1.8	1.8	-0.760571	2.0208	-2.185	4.754	-0.293
1WQO	A	1GB8	A	F38Y;V74M	2	130	130	1.8	1.8	-0.0538787	0.286618	-1.518	5.225	2.553	0.991
2BQN	A	2BQF	A	I89V;A93V	2	130	130	1.8	1.8	0.943787	0.602959	1.156	1.486	9.432	2.578
1L99	A	1L14	A	G105Q;T157S	2	164	164	1.95	1.7	-1.12069	0.725798	2.481	2.949	-1.856	3.689
1C8W	A	1IZR	A	G45T;F46A	2	124	124	1.8	1.5	1.66032	3.43176	3.752	6.318		3.452
1B7S	A	1GF0	A	A32S;S74V	2	130	130	2	1.8	1.75283	-0.0387916	1.57	1.028		-1.016
1QT8	A	1G0J	A	H26T;T152S	2	164	164	1.9	1.8	3.13317	10.0646	6.144	8.118	6.77	4.042
247L	A	237L	A	A84L;V149A	2	164	164	1.75	1.7	-1.68082	2.1252	-0.369	4.045	0.534	5.767
1ERO	A	5KKF	A	M157T;I236L	2	263	263	2.1	1.82	0.27702
1B5Y	A	1GFK	A	A36S;V74N	2	130	130	2.2	1.8	0.747483	0.213223	4.023	-1.781	0.277	1.558
1CH5	A	1LTW	A	L30W;V98H	2	154	154	2.1	1.7	1.53513	1.45137				9.232
1GFG	A	1IP2	A	R2V;G48A	2	130	130	1.8	1.8	-0.0508719	-0.256765	-4.213	4.414	-1.336	2.621
1IP6	A	1YAQ	A	I89V;A127G	2	130	130	1.8	1.8	-0.666704	1.69059	1.735	0.507	0.858	6.649
1B7Q	A	1GBZ	A	L27N;V110F	2	130	130	2	1.8	1.70863	0.852156	6.952	-2.908
1YAQ	A	2MEB	A	I56L;V89I	2	130	130	1.8	1.8	-1.03903	2.49881	0.042	4.753	8.739	5.972
1L98	A	1L09	A	E105Q;T157H	2	164	164	1.8	1.7	1.95213	-0.581467	4.667	-0.919	-0.371	6.032
1CKC	A	1TAY	A	A43T;Y63A	2	130	130	1.8	1.7	2.58649	-0.143015	5.434	-0.344	8.059	0.875
1IP2	A	1GB9	A	A48G;V74F	2	130	130	1.8	1.8	0.540039	1.01185	5.762	-2.975	0.791
1B7P	A	133L	A	G78H;R115H	2	130	130	2	1.77	2.51471	0.491582	-0.354	3.59		2.325
1JKA	A	1B5W	A	D35E;S61A	2	130	130	1.66	2.17	0.181109	0.714976	1.833	1.326	0.12	8.184
1GFR	A	1GF0	A	A32S;R74V	2	130	130	1.8	1.8	1.16359	-0.321418	2.49	0.374	4.305	-1.497
1UCK	A	1UCL	A	T43V;V57T	2	96	96	1.8	1.82	1.94668	-1.10266	1.812	-0.38	3.497	1.425
247L	A	1P2L	A	A84L;V87I	2	164	164	1.75	1.58	-3.97474	4.42291	-0.969	8.34	1.52	7.756
2MEE	A	1LHL	A	A47P;L59I	2	130	130	1.8	1.8	0.8668	1.77589	5.677	-2.563	0.289	5.573
1OUG	A	2MEF	A	A2V;I59M	2	130	130	1.8	1.8	0.197422	3.26295	-0.107	6.323	4.722	2.455
239L	A	1QS9	A	A17I;A98V	2	162	162	1.8	1.85	2.03686	4.08457	4.507	4.778	18.962	8.029
3HSD	A	1TMJ	A	A53Y;W89A	2	158	158	1.65	1.45	6.70002	0.839392	18.671	5.964	-0.747	7.198
1LYY	A	1LOZ	A	I56T;H67D	2	130	130	1.8	1.8	1.99698	1.5588	2.834	3.37	-0.991	7.923
1GBO	A	133L	A	G110V;R115H	2	130	130	1.8	1.77	-1.04317	1.01678	-1.715	3.626	-1.74	2.991
207L	A	1LAA	A	D53E;A77C	2	130	130	1.8	1.77	1.55775	2.86559	-3.327	-0.122	1.259	3.657
1GDW	A	1GB6	A	G21R;V74I	2	130	130	1.8	1.8	0.439752	0.741581	-0.417	4.171	3.283	1.741
3BIR	A	1TRQ	A	W59Y;N92H	2	104	104	1.8	2.3	4.46247	0.34496	3.488	10.24	4.714	6.127
1GAY	A	2MEH	A	G2V;I59T	2	130	130	1.8	1.8	2.77736	-2.91154	1.111	-0.304	3.984	-0.084
1WQO	A	207L	A	F38Y;C77A	2	130	130	1.8	1.8	4.2309	-1.03409	-4.609	2.753	2.04	0.407
1D6P	A	1GF3	A	L63Y;A92S	2	130	130	2.23	1.8	0.634279	-0.636117	2.796	-2.933
1GFR	A	1JKD	A	R74V;W109A	2	130	130	1.8	1.8	5.679	-3.03827	2.629	4.567	12.425	3.778
1QT4	A	1G0J	A	Q26T;T152S	2	164	164	2.1	1.8	4.78476	1.1263	5.464	5.706	2.741	2.47
5CSG	A	4RMV	A	D77H;Q98R	2	100	100	1.5	1.46	0.512073	-0.074342
1L20	A	1L47	A	D144N;R154E	2	164	164	1.85	1.7	2.49281	-2.12924	2.062	-1.827	2.715	-0.417
1GBY	A	1LHK	A	D91P;M110V	2	130	130	1.8	1.8	-0.682146	1.25105	6.581	-4.063	0.979	2.506
2MEC	A	1EQ4	A	E7Q;M56I	2	130	130	2.2	1.8	0.925723	-0.444348	3.784	-0.744	1.492
5JGR	A	1G0K	A	C43K;T152C	2	164	164	1.46	1.85	-1.18628	1.39044	4.625	-0.311		4.859
1B5V	A	2MEF	A	A51S;I59M	2	130	130	2.17	1.8	-0.595304	4.26788	3.497	6.508	5.638	4.477
1FD2	A	1G6B	A	A20C;P47S	2	106	106	1.9	1.9	2.90217	-0.383029	1.132	1.902	2.665	9.857
1B5W	A	2HEA	A	A61S;I106A	2	130	130	2.17	1.8	3.17924	-0.411968	5.034	4.616	5.373	3.566
3F8V	A	1L38	A	H96R;Q123E	2	164	164	1.08	1.8	-1.12758	7.37986	-1.555	20.071	3.012	8.674
2FD3	A	2H76	A	D10E;H34P	2	108	108	2.45	2.25	-0.718043	2.41449	1.487	-2.217	-0.583	3.302
1L23	A	1L38	A	A77G;Q123E	2	164	164	1.7	1.8	1.82148	-2.07621	1.994	-0.916	2.012	1.54
3KUE	A	1F9H	A	A77E;R92A	2	158	158	1.54	1.5	1.64372	2.40319	1.227	6.959	7.782
1WQQ	A	1GF7	A	F54Y;V100T	2	130	130	1.8	1.8	1.4536	2.55743	-0.929	2.151	5.348	2.466
1I3I	A	4RNT	A	T78V;H92A	2	104	104	1.76	2.2	-1.94704	2.29351	-1.019	4.27	0.823	12.903
1WQP	A	2HEE	A	F45Y;I59G	2	130	130	1.8	1.8	4.74214	-1.49916	7.672	-3.125	10.592	1.428
1QUL	A	1IXI	A	D56N;T137D	2	321	321	1.7	1.89	-0.397377	3.24796	-0.654	6.806	3.018	4.515
1I3F	A	3HOH	A	S89V;T93Q	2	104	104	2.35	1.95	-4.02704	4.41024	-5.694	9.704	-4.304	10.207
1LHY	A	5HVI	A	M157T;S218R	2	263	263	2	1.64	12.7358
1CH3	A	101M	A	F47V;W90L	2	154	154	2	2.07	5.31844	7.99821			11.17	10.637
1GFE	A	1LYY	A	N2V;D67H	2	130	130	1.8	1.8	7.17494	-0.476007	5.398	2.26	12.04	-2.195
1IP1	A	1B5Z	A	A37G;S82A	2	130	130	1.8	2.2	-1.74009	3.07337	-2.327	1.824	-1.764	4.173
240L	A	1QS9	A	A27I;A98V	2	162	162	1.75	1.85	1.93606	4.76255	7.554	4.305	11.888	7.764
133L	A	1CKD	A	T43V;H115R	2	130	130	1.77	1.8	0.0460117	0.667714	-1.251	2.381	1.8
5CKG	A	4FXL	A	D77N;E86V	2	100	100	1.75	1.4	0.659414	0.145751
1L28	A	1L13	A	G86P;T157R	2	164	164	1.9	1.7	1.77733	2.21803	16.109	-2.011	7.448	0.177
1UIE	A	1FLW	A	G15H;G71A	2	129	129	1.95	1.81	6.57564	2.23073	3.55	5.716	2.737
1GFJ	A	1EQ5	A	D74V;D102N	2	130	130	1.8	1.8	0.680115	-0.353952	4.528	1.575	-0.92	4.092
1L11	A	1L18	A	I3Y;L157T	2	164	164	1.7	1.7	3.16302	1.95923	6.171	4.821	4.339	9.932
1B7Q	A	2MEC	A	L27N;I56M	2	130	130	2	2.2	2.45985	0.0067331	3.945	-0.554		-0.853
1CJ6	A	2MEG	A	A11T;I59S	2	130	130	1.8	1.8	4.08533	-1.29011	6.706	-2.485		-1.281
1IP4	A	1I20	A	A72G;A92D	2	130	130	1.8	1.9	2.32312	1.11863	5.868	-1.851	6.588	-1.367
5CKG	A	4RMU	A	D77E;E86V	2	100	100	1.75	1.4	0.459012	2.22504
237L	A	1ZYT	A	A82C;A149V	2	164	164	1.7	1.7	-1.68638	1.44947	-3.471	5.638	-1.192
1L54	A	1G0Q	A	K102M;V149I	2	164	164	1.9	1.8	-3.78227	5.17735	-8.533	10.435	-7.138
1OUB	A	1GBO	A	A100V;V110G	2	130	130	1.8	1.8	1.59358	1.19078	3.44	1.976	5.325	-0.153
3HD2	A	3ILL	A	A50Q;D97A	2	158	158	1.1	1.73	0.252702	1.61451	-2.393	1.23		6.406
1JKA	A	2HEA	A	D35E;I106A	2	130	130	1.66	1.8	3.75034	-0.552746	6.319	4.736	1.625	7.135
1UIC	A	1IR8	A	A15H;I58M	2	129	129	1.95	1.63	-1.34182	5.26299	5.126	0.556	8.634	0.758
1MOB	A	1CP5	A	G65H;L105F	2	154	154	2.2	2.1	-0.674367	2.17739			-0.896	11.061
134L	A	1OUE	A	E115R;V125A	2	130	130	1.77	1.8	-0.343618	0.215019	4.276	-1.584	2.469	0.261
1YAO	A	1GF9	A	V2Y;V56I	2	130	130	1.8	1.8	-1.25542	1.05885	0.769	-0.559	0.184	4.546
3HD2	A	3HSZ	A	A50Q;F123A	2	158	158	1.1	1.4	0.527134	2.95557	-0.213	14.954		2.118
229L	A	1QSB	A	A95R;A98C	2	162	162	1.8	1.8	2.06223	2.57123	7.143	-3.029	15.187	1.994
2MEA	A	1GEV	A	L8T;F56I	2	130	130	2.2	2.1	8.87534	2.93634	8.992	17.228	13.753	2.282
4C4C	A	2CEL	A	E211Q;Q216E	2	433	433	1.45	2	-3.0993	1.46559	1.047	1.845	1.695	0.834
2MED	A	1GB9	A	F59I;V74F	2	130	130	1.8	1.8	3.82671	11.0742	7.591	8.219	10.959
2MED	A	1B7S	A	F59I;V74S	2	130	130	1.8	2	4.00302	5.61851	6.857	4.907	11.992
2IAQ	A	2IAX	A	D230S;A269S	2	312	312	2.1	1.1	0.00543535	0.576051			9.737	1.639
1GB8	A	1GBZ	A	M74V;V110F	2	130	130	1.8	1.8	0.0110457	1.20831	7.05	-3.122	1.295
5JEG	B	5JG5	B	I120T;F129Y	2	259	259	1.19	1.19	2.86462	-1.76076
1YAM	A	1CKD	A	T43V;V106I	2	130	130	1.8	1.8	-2.03093	2.64721	-4.563	5.26	-1.502
1GFK	A	1GF9	A	V2Y;N74V	2	130	130	1.8	1.8	0.858146	0.0117792	5.769	-0.317	-0.538	2.374
1IP2	A	1IP7	A	A48G;G129A	2	130	130	1.8	1.9	2.98119	-1.83245	3.44	-0.844	3.859	-1.866
1L26	A	1L53	A	C86P;V149C	2	164	164	1.7	1.85	1.81015	0.895956	19.191	-6.611	10.087	-0.68
3TGA	A	1SY0	A	T121V;R130L	2	184	184	1.3	1.15	1.03233	2.68593	-2.637	8.828	-2.715	8.049
1CIK	A	1CH5	A	H98V;A100I	2	154	154	1.7	2.1	-2.31241	4.33172			5.358
1WQM	A	1CKH	A	T70V;F124Y	2	130	130	1.8	2	1.51018	1.36894	-1.873	7.467	5.502
1GFE	A	1B7L	A	N2V;A32L	2	130	130	1.8	1.8	8.75388	3.26233	3.679	8.933	13.309	7.334
1GAY	A	1OUB	A	G2V;V100A	2	130	130	1.8	1.8	1.70289	2.43526	-1.673	6.541	-1.417	9.516
7CCP	A	1CCL	A	L45R;F199K	2	291	291	2.2	2	2.62953	-1.13213				-10.378
245L	A	2NTH	A	A6M;L118C	2	164	164	1.8	1.8	2.73934	-0.287308	4.674	-1.635	12.676	-9.713
2MEG	A	1B7O	A	G37Q;S59I	2	130	130	1.8	1.8	0.993118	3.29012	-6.218	9.932	1.171	6.345
1GBW	A	1CJ9	A	T40V;I110V	2	130	130	1.8	1.8	-0.554862	0.475203	1.281	1.951
1G06	A	1G0K	A	S149V;T152C	2	164	164	1.85	1.85	-2.79029	3.64255	-4.072	7.818		7.223
1LHI	A	1OUI	A	G71P;V93A	2	130	130	1.8	1.8	9.99617	1.06169	14.43	0.411	111.241	9.189
1LZG	A	1IR8	A	I58M;F62W	2	129	129	1.8	1.63	0.41372	1.87259	6.804	-6.478	10.205	-1.964
1TDY	A	1I20	A	W63Y;A92D	2	130	130	1.7	1.9	2.29792	-1.22395	-1.674	5.845	7.095	-2.511
1C60	A	1QS9	A	A98V;A153F	2	162	162	2	1.85	4.82944	5.53089	21.689	0.936		10.361
1GB3	A	1B5V	A	F2V;S51A	2	130	130	1.8	2.17	0.0960338	-0.262699	-0.902	6.542	3.663	-1.71
1GE2	A	1GFV	A	A78H;V110N	2	130	130	2	1.8	0.30087	0.320254	1.712	0.282
1GBW	A	1B7M	A	A96M;I110V	2	130	130	1.8	2.2	7.19849	3.11716	3.82	3.625		2.296
1GDW	A	1JKA	A	G21R;E35D	2	130	130	1.8	1.66	1.47709	0.431074	-0.633	2.161	10.032	-2.469
1GF8	A	1YAO	A	S2V;I56V	2	130	130	1.8	1.8	0.905791	-0.944271	-3.05	2.747	1.037	2.158
2MED	A	2MEC	A	I56M;F59I	2	130	130	1.8	2.2	3.10585	4.05217	4.777	5.436	12.838	8.553
1L19	A	1L48	A	D38S;A98V	2	164	164	1.7	1.7	6.94518	-1.52957	15.463	-2.332	13.055
1JKD	A	1YAM	A	I106V;A109W	2	130	130	1.8	1.8	-1.75446	4.48062	4.025	1.026	2.83	9.37
1L04	A	3CDQ	A	R96S;D157T	2	164	164	1.7	1.68	3.07173	5.70396	3.195	1.839	1.285	4.314
1CJ6	A	1LHL	A	A11T;A47P	2	130	130	1.8	1.8	-0.656283	2.1076	0.774	-0.482		1.332
1TAY	A	2MEE	A	I59L;A63Y	2	130	130	1.7	1.8	-0.806532	3.19482	2.453	3.998	5.171	5.052
1L37	A	3FI5	A	R96W;E115T	2	164	164	1.85	1.53	9.42292	1.42864	29.575	-5.047	8.062	4.965
2HEB	A	1GE1	A	A23I;Q58A	2	130	130	2.2	1.7	-2.27353	3.77232	-0.662	7.195	2.747	6.684
2DG9	A	2PPO	A	L59W;E60A	2	107	107	1.7	1.29	1.60363	3.10722	7.53		9.608
1B7P	A	134L	A	G78H;R115E	2	130	130	2	1.77	3.69875	-1.24589	0.522	0.71		0.117
2F0U	A	4I65	A	I20V;I87V	2	136	136	1.83	1.61	2.10803	0.623107			3.978	-1.62
2D02	A	1F98	A	T50V;Q52R	2	125	125	1.42	1.15	-1.41329	4.39864	0.752	0.794	5.596	3.814
5MSI	A	6MSI	A	C17R;R40A	2	66	66	1.6	1.65	-0.482729	0.110716
1L29	A	1L52	A	H86P;T152S	2	164	164	1.7	1.7	1.81909	2.40386	17.517	-3.002	7.461	3.966
1L68	A	1QS9	A	A44S;A98V	2	162	162	1.7	1.85	4.30854	1.43541	13.356	-5.045	14.832	1.436
1TDY	A	2MEH	A	I59T;W63Y	2	130	130	1.7	1.8	2.92209	-3.13972	-1.113	0.987	6.256	-2.792
3DMV	A	1G0J	A	A99L;T152S	2	164	164	1.65	1.8	-2.68073	3.65051	-2.43	1.489	-5.116	11.807
1WQP	A	1YAM	A	F45Y;I106V	2	130	130	1.8	1.8	2.10671	-1.89453	0.917	-0.049	2.916	-1.38
1FF2	A	1FRJ	A	F25I;D42C	2	106	106	2.3	2.3	2.44045	1.22979	-1.129	6.305		7.285
1L29	A	3FI5	A	H86P;R96W	2	164	164	1.7	1.53	10.1911	5.28616	48.143	-7.355	11.945	9.54
180L	B	1L39	A	E26T;N144E	2	164	164	1.75	1.85	-3.65935	5.57474	2.34	10.996	0.797	5.427
5G27	A	1QT7	A	E11N;C118L	2	164	164	1.61	1.8	-3.80003	5.59586	-8.48	7.004		7.373
4A1Y	A	4A1H	A	K47S;Q67K	2	133	133	1.2	2.2	0.42737	-0.114596			0.18	0.532
1RQW	A	5A47	A	K46N;D113N	2	207	207	1.05	1.2	0.974178	-1.39102	-4.087	3.359	1.945
1CKF	A	1IP6	A	A52T;G127A	2	130	130	1.8	1.8	4.1475	-2.01588	4.316	-0.457		-2.67
1INU	A	2MEF	A	I59M;R110V	2	130	130	1.8	1.8	0.337079	2.44119	-0.343	5.073	4.525	3.323
1GFV	A	2MEC	A	I56M;N110V	2	130	130	1.8	2.2	-0.469198	0.715953	0.591	-0.444		2.02
1C5H	A	1XXN	A	D35N;T147S	2	185	185	1.55	1.7	-2.03069	3.81537	-1.136	2.512	-2.101	5.115
4RMT	A	4RMQ	A	D60N;N99D	2	100	100	1.24	1.46	0.36512	-0.625664
1GE0	A	1GE1	A	G38Y;Q58A	2	130	130	1.8	1.7	0.530671	1.9865	-1.996	7.214	-2.086	8.47
1IP5	A	1LAA	A	D53E;A105G	2	130	130	1.8	1.77	-1.69736	2.90417	0.503	2.262	-0.119	6.359
1LYI	A	1QTB	A	A42V;D59T	2	162	162	2	1.9	6.73239	-0.677236	6.681	3.556	15.933	2.951
1IP1	A	2MEI	A	A37G;I59Y	2	130	130	1.8	1.8	15.3868	6.43377	17.322	4.544	11.278	11.489
1QUD	A	220L	A	G99L;M102A	2	162	162	1.75	1.85	-1.07493	1.61926	-5.154	4.959	-3.598	8.597
1G02	A	7RNT	A	S16V;Y45W	2	104	104	1.86	1.9	-1.95711	2.73366	-0.002	-0.089
1OBO	A	1OBV	A	L57W;Y94F	2	169	169	1.2	2.1	-0.126665	-0.361601			3.547
1GB0	A	134L	A	L2V;R115E	2	130	130	1.8	1.77	2.18172	-1.54318	-1.827	2.509		0.241
1L95	A	1QSB	A	A98C;V153F	2	162	162	2	1.8	2.61774	3.83511	11.514	0.696	11.545	4.947
1GBY	A	1GEZ	A	A9S;M110V	2	130	130	1.8	1.8	1.49904	-1.1485	4.31	-2.343	4.268	-2.452
3DVD	A	3TVN	X	D60N;N65Q	2	258	258	1.6	1.5	0.0125413	-0.60931			-2.129	4.618
1B7Q	A	1GFV	A	L27N;V110N	2	130	130	2	1.8	1.63062	0.133464	4.91	-0.301
1GFG	A	1GE0	A	R2V;Y38G	2	130	130	1.8	1.8	1.35517	-0.0476724	3.855	-1.831	6.446	-1.329
1TAY	A	1INU	A	A63Y;V110R	2	130	130	1.7	1.8	-1.06512	2.53581	0.443	-0.204	1.295	2.233
207L	A	2MEE	A	I59L;A77C	2	130	130	1.8	1.8	-0.171685	5.37091	-0.356	0.678	6.058	1.455
1CKC	A	1IP5	A	A43T;G105A	2	130	130	1.8	1.8	5.07874	-1.36962	3.157	1.518	5.63	0.872
1H85	A	1E64	A	K67Q;L128V	2	295	295	2.3	2.3	1.12323	-0.855158			-0.346
1GFK	A	1GF7	A	N74V;V100T	2	130	130	1.8	1.8	1.41743	2.75983	3.175	-0.23	2.012	1.207
1EQE	A	1GFT	A	V110Y;N120D	2	130	130	1.8	1.8	-0.646333	1.82336	1.28	0.176	1.466	2.487
1GBY	A	1EQE	A	M110V;D120N	2	130	130	1.8	1.8	1.81943	-0.47894	5.165	-0.181	2.76	0.39
1KVB	A	3AA3	A	A52L;H134D	2	155	155	1.9	2.2	0.31175	2.23515	5.061	6.521	3.321	5.541
1UIE	A	1KXW	A	G15H;N27D	2	129	129	1.95	1.96	2.00635	4.37721	6.73	4.433	2.634	3.159
1K59	A	5M9R	A	F99I;G116Q	2	122	122	1.8	1.44	0.29537	1.6819	-5.293		0.656
1L99	A	1L24	A	A82P;G105Q	2	164	164	1.95	1.7	-2.08941	2.47204	2.058	0.847	-3.521
2HEC	A	1LHK	A	A56I;D91P	2	130	130	1.8	1.8	-4.88823	5.09814	1.497	1.232	1.595	8.089
4YGJ	A	1CAJ	A	G7K;E104D	2	258	258	1.1	1.9	2.58673	2.64688				7.875
2B6T	A	1QSB	A	A98C;A99L	2	162	162	2.1	1.8	-0.633971	3.65225	-3.397	9.519	6.708	4.927
134L	A	1EQ4	A	E7Q;E115R	2	130	130	1.77	1.8	-0.485921	1.74383	1.535	-2.147	-0.288
1JKA	A	1I20	A	D35E;A92D	2	130	130	1.66	1.9	2.14997	-0.00745475	5.315	-2.722	4.747	2.728
1B5Y	A	1TAY	A	A36S;Y63A	2	130	130	2.2	1.7	1.70886	1.11314	3.672	-2.44	2.998	0.483
1TDG	A	3OPL	A	G105S;R139H	2	265	265	1.8	1.8	5.0268	-0.974938
5KIG	A	1QUG	A	F88Y;E108V	2	162	162	1.5	1.9	1.46379	-1.06482	-6.388	6.552		3.123
2HEB	A	1TAY	A	A23I;Y63A	2	130	130	2.2	1.7	-0.870948	2.83175	-2.634	5.844	4.343	5.309
1TAY	A	1LYY	A	A63Y;D67H	2	130	130	1.7	1.8	4.22279	1.2922	4.755	0.867	9.609	10.147
1WQN	A	1EQ4	A	E7Q;F20Y	2	130	130	1.8	1.8	0.778918	0.565291	0.985	5.414	1.051
1BB3	A	1CJ9	A	T40V;L96A	2	130	130	1.8	1.8	4.12069	4.43988	7.996	2.813	10.833
1CKC	A	2HEC	A	A43T;I56A	2	130	130	1.8	1.8	4.20224	-2.91886	8.847	-4.282	9.68	-1.05
1B7O	A	1GF0	A	A32S;Q37G	2	130	130	1.8	1.8	-0.250949	2.05504	4.822	-2.206	1.941	1.082
1GAZ	A	1GF3	A	I2V;A92S	2	130	130	1.8	1.8	0.917305	-0.886424	3.191	-3.38	2.829
1CJ6	A	1B5Z	A	A11T;S82A	2	130	130	1.8	2.2	-0.12198	0.393389	-4.204	0.554		-1.09
1L02	A	3CDO	B	R96V;A157T	2	164	164	1.7	1.87	1.06819	3.34784	-0.604	3.972	1.899	3.814
1CJ8	A	1OUB	A	A40T;V100A	2	130	130	1.8	1.8	2.85157	0.635511	3.558	2.345		4.405
230L	A	1QTZ	A	L6M;D20C	2	164	164	1.9	2	3.11683	-1.31042	0.718	-1.037	1.677	2.977
1GE1	A	2MEB	A	I56L;A58Q	2	130	130	1.7	1.8	0.535707	1.12692	2.447	6.029	2.81	6.216
1JKA	A	1IP7	A	D35E;G129A	2	130	130	1.66	1.9	4.43713	-0.637988	1.492	1.664	1.063	4.81
1LHJ	A	1YAO	A	I56V;G103P	2	130	130	1.8	1.8	1.35567	-0.35037	6.253	-2.21	13.003	2.282
1AKR	A	1F4P	A	A60G;Y97W	2	147	147	1.58	1.3	1.86842	4.90536			4.05
1GF4	A	1CJ7	A	T11V;T93V	2	130	130	1.8	1.8	-0.250394	2.94034	-4.718	3.186	-2.685
1EIC	A	3RSD	A	A120F;D121N	2	124	124	1.4	1.6	-3.46015	4.27876	-5.742	6.753	5.988	9.553
1GF7	A	1GFV	A	T100V;V110N	2	130	130	1.8	1.8	1.23217	1.4984	-1.456	2.743	-0.187
133L	A	2MEI	A	I59Y;H115R	2	130	130	1.77	1.8	12.8671	3.90511	15.312	2.671	16.946	5.834
2HEE	A	1IP3	A	G59I;G68A	2	130	130	1.8	1.8	0.313304	3.8492	-3.201	9.662	4.396	8.604
2HEA	A	1LAA	A	D53E;A106I	2	130	130	1.8	1.77	-0.337821	2.64248	3.137	8.254	1.737	8.246
1GB6	A	1GFU	A	I74V;V110D	2	130	130	1.8	1.8	-1.09675	1.39757	1.478	-1.281	1.899	1.175
1GFA	A	1B7P	A	D2V;H78G	2	130	130	1.8	2	-0.18987	2.47191	-4.152	3.833	-2.215
1CH2	A	2MGF	A	H65Q;F90L	2	154	154	1.8	1.8	-0.268308	0.893536				6.254
1P2L	A	1G0J	A	I87V;T152S	2	164	164	1.58	1.8	1.73713	-0.652555	3.185	0.259	3.356	14.514
1CJ6	A	2MEC	A	A11T;I56M	2	130	130	1.8	2.2	-0.668414	0.923768	-1.512	2.033		1.287
1B7N	A	1B7L	A	A32L;L35E	2	130	130	1.8	1.8	7.43739	1.22757	14.75	3.694	11.553	7.416
1TDY	A	1GFJ	A	W63Y;V74D	2	130	130	1.7	1.8	-0.197837	0.949116	-5.421	12.178	2.552	1.024
1IP3	A	1IP7	A	A68G;G129A	2	130	130	1.8	1.9	1.07374	-0.0141661	-0.109	1.04	2.081	0.518
2HEA	A	1GBW	A	A106I;V110I	2	130	130	1.8	1.8	-1.3551	3.77141	5.051	5.247	1.115
1GE2	A	1YAP	A	I59V;A78H	2	130	130	2	1.8	1.14131	0.112625	2.674	1.359		0.354
1H2X	A	1O6F	A	F473Y;D641A	2	710	710	1.49	1.6	2.43094	2.67684	1.139	7.702	1.488
1OUC	A	134L	A	A110V;R115E	2	130	130	1.8	1.77	2.12789	-1.45067	-1.238	-1.867	3.934	-0.229
1GFG	A	1GEV	A	R2V;L8T	2	130	130	1.8	2.1	6.28798	-1.34248	7.146	0.878	8.514	-2.255
3C8Q	A	1L60	A	D96R;G113A	2	164	164	1.64	1.7	0.467817	4.0514	-5.915	8.443	-0.623	10.28
1INU	A	1GF0	A	A32S;R110V	2	130	130	1.8	1.8	2.94731	-0.981487	1.043	0.13	1.919	-0.812
1GAY	A	1WQO	A	G2V;Y38F	2	130	130	1.8	1.8	-0.856132	0.508839	-2.649	3.078	-2.798	4.202
1GFE	A	1D6Q	A	N2V;D102E	2	130	130	1.8	1.96	0.896223	0.304084	-2.026	4.45	-1.145
2B6T	A	1L62	A	A99L;T109D	2	162	162	2.1	1.7	-3.64657	3.53077	-4.838	8.556	-5.578	5.875
2HOH	A	1I3I	A	A9N;V78T	2	104	104	1.9	1.76	2.56569	-2.21899	3.288	-1.822	4.022	-1.763
1CJ8	A	133L	A	A40T;R115H	2	130	130	1.8	1.77	0.355823	0.237668	-0.495	1.332		2.094
1GFA	A	1GB6	A	D2V;V74I	2	130	130	1.8	1.8	-0.0527015	0.613077	-4.474	3.334	-3.159	5.223
150L	A	1L31	A	I6M;P86R	2	164	164	2.2	1.8	1.36323	6.85274	-3.48	26.328	4.861	8.993
1B5W	A	2MEG	A	I59S;A61S	2	130	130	2.17	1.8	4.06665	-0.42621	7.718	-4.731	8.392	1.298
1GAZ	A	1CKH	A	I2V;T70V	2	130	130	1.8	2	0.641828	1.09351	0.308	3.918	4.95
242L	A	2Q9D	A	A41C;A50I	2	164	164	1.8	1.4	-1.25124	1.39985	3.508	4.404	1.958
2NUI	A	1A5Q	A	A83D;P93A	2	124	124	1.1	2.3	1.63588	-0.616288	-2.513	1.327	2.781
1GE2	A	1B5X	A	A78H;S80A	2	130	130	2	2	0.625301	0.0178103	-0.605	1.763		1.904
1IP5	A	2HEA	A	A105G;I106A	2	130	130	1.8	1.8	1.35294	2.322	5.833	2.969	4.189	2.699
1L28	A	3C7Y	A	G86P;R96A	2	164	164	1.9	1.95	2.03803	0.995595	15.955	-3.587	6.767	-0.018
1WQQ	A	1OUB	A	F54Y;V100A	2	130	130	1.8	1.8	1.97134	2.62996	0.047	4.653	4.868	7.135
2AAD	A	1RLS	A	K25Q;K40H	2	104	104	2	1.9	0.895257	-0.689255	-2.574	4.288	-0.091	4.799
2HEB	A	1GF7	A	A23I;V100T	2	130	130	2.2	1.8	-0.861441	2.28134	-0.583	5.254	1.949	4.746
1L22	A	1L07	A	G124K;T157F	2	164	164	1.7	1.7	0.69026	0.319258	8.18	-3.184	1.804	-0.366
1OUD	A	2MEF	A	I59M;A121V	2	130	130	1.8	1.8	-0.978252	3.68083	-0.632	6.067	5.289	4.193
172L	A	3C8R	A	C3I;R96G	2	164	164	1.9	1.8	4.79523	-0.933938	2.166	-2.609	6.334	1.1
1D6P	A	1B7P	A	L63Y;H78G	2	130	130	2.23	2	-0.45441	1.71682	0.585	0.462
1L62	A	1QTB	A	A42V;D109T	2	162	162	1.7	1.9	4.3967	1.98885	6.627	3.187	13.763	-0.16
3DHJ	A	4RMU	A	C61W;D77E	2	100	100	2	1.4	0.447705	2.92615
2HEF	A	1GF7	A	A89I;V100T	2	130	130	1.8	1.8	-1.16669	4.99089	0.583	3.64	5.904	5.295
1LAA	A	1GEZ	A	A9S;E53D	2	130	130	1.77	1.8	0.890115	-0.00803288	3.98	-0.742	7.306	-4.589
1MTI	A	2OH8	A	I29W;L47F	2	154	154	1.9	1.8	6.85388	2.89635			12.91	14.973
3H57	A	1MGN	A	L65Y;N69V	2	154	154	1.7	1.9	1.36073	-0.0758382			3.877	7.737
1CKF	A	1CJ7	A	T11V;A52T	2	130	130	1.8	1.8	0.431653	1.65902	4.299	0.331
1GB3	A	1B7Q	A	F2V;N27L	2	130	130	1.8	2	-0.41018	2.4569	-3.126	9.47	-0.99
1GF7	A	1LHK	A	D91P;T100V	2	130	130	1.8	1.8	0.737197	3.33947	2.88	-0.532	0.856	2.924
3C8Q	A	1L46	A	D96R;K147E	2	164	164	1.64	1.7	0.783638	4.00878	-6.997	7.038	1.885	8.409
1PQO	A	254L	A	D20S;I118L	2	164	164	1.65	1.9	0.373351	2.03531	0.957	3.127	1.601	10.996
1OUJ	A	2MEH	A	I59T;A99V	2	130	130	1.8	1.8	1.78795	-0.610862	6.062	-2.6	9.566	0.954
167L	A	1L35	A	C3I;C97A	2	164	164	2.2	1.8	1.67516	3.29034	0.429	2.693	-0.111	6.046
4YGJ	A	3DVC	A	G7K;N60T	2	258	258	1.1	1.6	1.70955	1.2794				2.543
1GE3	A	1LHK	A	D91P;G118N	2	130	130	1.8	1.8	0.854767	1.1481	5.523	-2.93	2.677	1.81
2MEI	A	1CKD	A	T43V;Y59I	2	130	130	1.8	1.8	3.50034	9.80141	1.596	16.537	6.991
2HEF	A	1GF5	A	A89I;A96S	2	130	130	1.8	1.8	-1.53373	1.77363	0.742	4.76	5.296	2.62
1CJ6	A	1OUH	A	A11T;V74A	2	130	130	1.8	1.8	0.533241	-0.142029	-0.303	2.736		-0.026
1GAZ	A	1YAN	A	I2V;I23V	2	130	130	1.8	1.8	1.40464	-1.45015	1.213	-1.095	2.192	-0.864
1IOQ	A	193L	A	F12M;F56L	2	129	129	1.79	1.33	2.68354	-0.0902783	3.394	6.19	16.608	-3.693
1OUG	A	1WQO	A	A2V;Y38F	2	130	130	1.8	1.8	0.179584	0.423474	1.037	0.795	-1.837	4.126
1B5W	A	1IP3	A	A61S;G68A	2	130	130	2.17	1.8	2.31338	-2.06009	0.122	0.266	3.801	1.281
2HEC	A	1GFH	A	A56I;V74Y	2	130	130	1.8	1.8	-3.19332	3.75425	-2.837	5.68	-2.781	10.135
1UIE	A	1H6M	A	G15H;E35Q	2	129	129	1.95	1.64	3.30926	2.78357	5.683	7.841	-0.388	5.469
1CTW	A	1QUG	A	A78I;E108V	2	162	162	2.1	1.9	3.08193	3.90403	1.867	12.096	8.363	8.079
1JKB	A	1GF9	A	V2Y;A35E	2	130	130	1.66	1.8	1.87278	-1.18153	12.023	-3.301	7.435	1.594
1B5X	A	1EQE	A	A80S;D120N	2	130	130	2	1.8	1.52754	0.55308	1.839	-1.601	-1.049	1.774
1L29	A	3C8Q	A	H86P;R96D	2	164	164	1.7	1.64	3.39627	3.00624	19.762	-8.533	15.272	2.109
1CIO	A	1MGN	A	H65Y;V100I	2	154	154	1.6	1.9	-1.84774	1.95127				6.804
2TIR	A	2H74	A	D2E;E36K	2	108	108	2	2.4	-0.754083	1.38797	1.53	0.276	9.648	2.681
1WQN	A	2MEA	A	F20Y;I56F	2	130	130	1.8	2.2	9.52512	4.70197	11.531	2.903	8.889	7.711
2MEC	A	1LHL	A	A47P;M56I	2	130	130	2.2	1.8	-1.42619	1.20659	3.169	-1.938	-0.395	4.539
2MEF	A	1LOZ	A	I56T;M59I	2	130	130	1.8	1.8	6.55018	-2.32257	10.741	-1.312	9.582	3.142
1LAV	A	1RDC	A	D70N;L74V	2	155	155	1.8	2.3	-0.82407	0.504643	-0.759	-2.243	4.234	10.247
3HZX	A	3P75	A	K54V;V92D	2	129	129	2	1.9					5.268	16.816
1GFG	A	1CKC	A	R2V;T43A	2	130	130	1.8	1.8	0.817954	0.416815	-2.809	5.231	-0.094	5.958
1CKH	A	1B7L	A	A32L;V70T	2	130	130	2	1.8	8.25969	5.15284	10.383	6.04		9.883
207L	A	1GBZ	A	A77C;V110F	2	130	130	1.8	1.8	0.00433629	4.59807	3.116	-4.497	1.049
253L	A	3DMV	A	A20D;L99A	2	164	164	2	1.65	2.31206	-1.62764	4.472	-2.876	10.8	-4.927
1KBB	A	2CPU	A	A232E;D299N	2	495	495	1.9	2	-1.05461	0.81789	0.961	-0.163	1.365	4.946
2HEB	A	1B7O	A	A23I;G37Q	2	130	130	2.2	1.8	-0.0853284	1.77099	-5.313	9.095	3.037	3.757
1D6P	A	1GF9	A	V2Y;L63Y	2	130	130	2.23	1.8	0.535945	0.134535	6.138	-1.985		2.936
2HEB	A	1B7Q	A	A23I;N27L	2	130	130	2.2	2	-3.53099	5.34077	-6.903	8.913	-1.374
4W51	A	1L18	A	I3Y;A99L	2	164	164	1.45	1.7	-0.0698442	4.38519	4.636	6.463		16.923
1GBY	A	1OUE	A	M110V;V125A	2	130	130	1.8	1.8	2.97253	-1.0452	5.769	-2.453	4.048	-0.729
1OUH	A	1GEV	A	L8T;A74V	2	130	130	1.8	2.1	6.48427	-0.58202	10.362	-0.217	8.09	-3.382
1EY4	A	1KAB	A	A54S;K111G	2	136	136	1.6	1.8	0.976427	0.859282				10.51
1ZVG	A	1ZVE	A	D10G;S11P	2	66	66	1.2	1.7	1.01171	1.25659	7.431	2.6	-0.161	4.825
1GB9	A	134L	A	F74V;R115E	2	130	130	1.8	1.77	2.83039	-1.84789	-1.332	1.744		0.998
1G3O	A	1FF2	A	E19V;C42D	2	106	106	1.65	2.3	1.77515	0.589612	5.25	1.571	4.969
1TCY	A	2MEB	A	I56L;F63Y	2	130	130	1.7	1.8	-0.240102	0.671614	1.367	5.293	3.416	3.488
1QUD	A	1TLA	A	G99L;S117F	2	162	162	1.75	2	-2.19569	11.2913	-16.838	19.749	-1.289	21.03
1GFE	A	1D6P	A	N2V;Y63L	2	130	130	1.8	2.23	1.78045	0.378706	-1.261	1.632	0.425
1GF8	A	1TDY	A	S2V;Y63W	2	130	130	1.8	1.7	-0.7459	0.377485	1.55	-2.013	-1.328	2.023
2HEA	A	134L	A	A106I;R115E	2	130	130	1.8	1.77	0.294483	2.39158	4.243	6.131	4.365	3.909
1GF0	A	1GF9	A	V2Y;S32A	2	130	130	1.8	1.8	-0.346161	0.966471	4.359	-0.541	-3.505	6.096
1WQN	A	207L	A	F20Y;C77A	2	130	130	1.8	1.8	4.16451	0.936667	-4.416	3.257	0.588	1.128
1MLU	A	1MLQ	A	G65H;A69L	2	154	154	1.9	2	-2.48861	3.21101			3.571	9.168
1GB3	A	2HEE	A	F2V;I59G	2	130	130	1.8	1.8	4.78617	-2.17644	6.417	0.482	10.315	2.952
1WQN	A	1GFJ	A	F20Y;V74D	2	130	130	1.8	1.8	0.427086	2.19307	-0.734	7.863	2.987	1.823
1L21	A	1L48	A	G55N;A98V	2	164	164	1.85	1.7	6.9068	1.81934	11.054	0.793
1TAY	A	1GFV	A	A63Y;V110N	2	130	130	1.7	1.8	-0.925921	1.47861	0.286	1.257	0.253
1HZ1	A	1FZU	A	A16V;V78A	2	104	104	1.8	1.8	1.21334	-0.312279	2.328	-1.173	6.724	2.808
1B7Q	A	1B5W	A	L27N;S61A	2	130	130	2	2.17	2.45205	-0.893606	3.392	-0.38		-0.031
5JGN	A	1QT3	A	C9I;T26D	2	164	164	1.53	1.85	1.83382	-3.40979	4.399	3.31		-1.356
1L45	A	1L48	A	A98V;E135K	2	164	164	1.7	1.7	2.55663	3.37694	11.394	-1.747	13.657
1GB2	A	1BB3	A	M2V;A96L	2	130	130	1.8	1.8	6.07284	4.55443	1.76	6.832	7.15	8.243
1TAY	A	1BB3	A	A63Y;A96L	2	130	130	1.7	1.8	4.15496	6.29524	-0.729	9.064	4.356	10.21
1IP4	A	1GB8	A	A72G;V74M	2	130	130	1.8	1.8	-0.81905	1.28986	0.678	1.24	-0.539	1.525
3DV7	A	5JDV	B	A60N;F128W	2	258	258	1.7	1.34		2.38357			1.564
3C7Y	A	1L31	A	P86R;A96R	2	164	164	1.95	1.8	0.533191	3.24601	-5.762	28.438	-0.324	7.821
1B7P	A	2MEB	A	I56L;G78H	2	130	130	2	1.8	1.87611	0.566469	1.973	3.495		3.587
4YGJ	A	1TH9	A	G7K;N65H	2	258	258	1.1	1.63	-0.662233	1.51773				5.014
1CO8	A	2SPO	A	L30V;A105L	2	154	154	1.8	1.7	-1.39381	1.50326				6.238
1GF8	A	2MEA	A	S2V;I56F	2	130	130	1.8	2.2	10.488	6.09992	12.795	2.838	5.002	9.996
1GE3	A	2MEF	A	I59M;G118N	2	130	130	1.8	1.8	1.24837	2.40009	0.657	4.766	9.281	1.282
1GFR	A	1GF5	A	R74V;A96S	2	130	130	1.8	1.8	1.49401	-1.11625	1.077	0.604	3.513	-1.569
1G02	A	1LOV	A	S16V;E58A	2	104	104	1.86	1.55	-0.485215	4.13633	-8.404	8.373		6.09
1OUC	A	1I20	A	A92D;A110V	2	130	130	1.8	1.9	2.94321	-1.3931	4.835	-6.241	7.832	-3.392
1OUJ	A	133L	A	A99V;R115H	2	130	130	1.8	1.77	-0.337362	3.39482	-0.36	4.321	1.196	6.703
2BQO	A	2BQD	A	I56V;A99V	2	130	130	1.8	1.8	2.53843	0.935301	7.209	1.192	3.889	3.273
1IOS	A	1FLQ	A	F12M;G117A	2	129	129	1.76	1.8	2.9542	-1.62766	1.663	5.621	11.722	-4.717
1GFA	A	1CKD	A	D2V;T43V	2	130	130	1.8	1.8	-0.0343517	1.0123	-6.698	5.564	-3.259
2HEC	A	1D6Q	A	A56I;D102E	2	130	130	1.8	1.96	-3.92576	3.76254	-5.807	7.471	-2.92
1B5U	A	1OUC	A	A24S;V110A	2	130	130	1.8	1.8	-0.00520402	0.409456	1.94	-0.09	0.622	1.65
1GE0	A	1GF4	A	G38Y;V93T	2	130	130	1.8	1.8	2.20403	2.14497	0.985	0.939	-1.662	6.623
1JKA	A	1TAY	A	D35E;Y63A	2	130	130	1.66	1.7	1.14797	0.115786	3.213	-1.09	1.471	7.197
1GFV	A	1LHK	A	D91P;N110V	2	130	130	1.8	1.8	-0.364191	1.2479	5.24	-3.269		2.222
1IP4	A	1JKC	A	A72G;W109F	2	130	130	1.8	1.6	1.02956	2.76454	0.141	4.54	0.896	4.485
1GE1	A	1EQE	A	A58Q;D120N	2	130	130	1.7	1.8	2.1181	0.233323	1.885	1.161	2.941	2.25
3GHV	A	3GHC	A	K35S;F64S	2	186	186	1.3	1.3	1.26729	-1.08103	-0.081	-1.569	5.567	-3.402
1GB2	A	1TAY	A	M2V;Y63A	2	130	130	1.8	1.7	1.35857	-0.658164	2.556	-0.167	2.376	1.217
1GDW	A	1GB5	A	G21R;V74G	2	130	130	1.8	1.8	0.47821	0.69914	3.382	3.233	4.183
3DHJ	A	5CKG	A	C61W;V86E	2	100	100	2	1.75	-0.139534	-0.0104805
1GB6	A	1B7N	A	E35L;I74V	2	130	130	1.8	1.8	-1.51343	4.10102	-0.51	6.659	2.995	4.193
1GBY	A	1GF9	A	V2Y;M110V	2	130	130	1.8	1.8	1.07489	-0.271364	5.398	-3.225	0.298	1.87
1QOG	A	1J7B	A	A47S;E94K	2	98	98	1.8	1.8	0.269896	0.268247	-0.299	-2.436	5.336	-0.352
1CJ9	A	1B7O	A	G37Q;V40T	2	130	130	1.8	1.8	3.22028	-2.18573	0.789	3.509		1.891
1INU	A	1B7M	A	A96M;R110V	2	130	130	1.8	2.2	7.42833	3.26973	2.691	4.159	4.482	3.568
1GAZ	A	1LHH	A	I2V;V110P	2	130	130	1.8	1.8	-1.40085	1.80172	3.797	-3.071	0.6
2HEC	A	1GB9	A	A56I;V74F	2	130	130	1.8	1.8	-3.2304	4.34015	-0.973	6.414	-2.271
1IZR	A	3I7Y	A	A46F;I106A	2	124	124	1.5	2.4	5.26735	2.98343	7.91	2.941	4.431	11.097
5JGR	A	3DMV	A	C43K;L99A	2	164	164	1.46	1.65	2.63387	-2.13744	8.098	-7.534		-5.394
2HEC	A	1B7N	A	E35L;A56I	2	130	130	1.8	1.8	-5.27481	6.96657	-7.554	11.973	-0.587	9.426
1GE0	A	1WQP	A	G38Y;Y45F	2	130	130	1.8	1.8	0.275893	2.29736	-0.461	5.527	-4.103	7.494
3MNI	A	1UGB	A	A63G;D167K	2	258	258	1.75	2					0.583	8.153
1TCY	A	1GB7	A	F63Y;V74L	2	130	130	1.7	1.8	-0.890862	-0.212731	-2.877	4.507	0.744	1.966
3CDR	A	1L13	A	Q96R;T157R	2	164	164	1.7	1.7	-1.12413	0.761894	0.04	0.592	2.89	-1.788
1B5V	A	134L	A	A51S;R115E	2	130	130	2.17	1.77	0.875866	-0.180812	0.545	1.611	1.057	2.295
1B7N	A	1GEZ	A	A9S;L35E	2	130	130	1.8	1.8	4.77854	-2.59675	8.41	-4.273	7.801	-1.22
1LYG	A	1QUG	A	N59T;E108V	2	162	162	1.8	1.9	1.61737	-2.56621	-1.376	1.577		3.296
1TDY	A	1GF9	A	V2Y;W63Y	2	130	130	1.7	1.8	-0.148769	0.330821	-1.519	6.059	-0.311	2.107
1WQP	A	2MEH	A	F45Y;I59T	2	130	130	1.8	1.8	3.29351	-3.0511	3.502	-4.229	6.783	-3.152
1GB3	A	1OUB	A	F2V;V100A	2	130	130	1.8	1.8	1.58864	2.02808	-0.981	6.918	0.64	6.052
1GB5	A	1GE4	A	G74V;N118A	2	130	130	1.8	1.8	1.08329	-0.355372	1.065	2.681		-1.009
1BQE	A	1E64	A	K67Q;G147T	2	295	295	2.45	2.3	-1.594	1.78371
1B5U	A	1GBY	A	A24S;V110M	2	130	130	1.8	1.8	-0.108821	1.23585	0.559	1.685	0.882	1.601
1S54	A	3COC	A	A20T;D111A	2	227	227	2.2	2.31	-3.3776	3.61474			-3.473	11.544
1AZI	A	3HEN	A	H64V;V67R	2	153	153	2	1.9	0.153079	1.33696	2.456	-1.398		0.771
1JKA	A	2MEE	A	D35E;I59L	2	130	130	1.66	1.8	-0.28985	2.60897	1.91	2.752	2.346	7.136
3HOH	A	3BIR	A	H92N;Q93T	2	104	104	1.95	1.8	-0.680807	3.18386	1.497	8.592	7.621	1.247
2MED	A	1I1Z	A	F59I;Q86D	2	130	130	1.8	1.8	3.48912	5.18436	4.058	7.412	15.156	-1.963
1I3I	A	4BIR	A	T78V;H92Q	2	104	104	1.76	1.7	-2.25316	3.38536	-0.508	8.403	-1.113	9.074
1GE0	A	1GEZ	A	A9S;G38Y	2	130	130	1.8	1.8	1.59241	1.42902	-1.689	3.851	-0.705	4.762
2EB8	A	3NML	A	H65W;D123N	2	154	154	1.65	1.68	-0.875567	0.568271			5.06	5.243
1GB8	A	1B5Z	A	M74V;S82A	2	130	130	1.8	2.2	0.450625	-0.379619	-1.733	-0.295	1.876	-0.023
1FRL	A	1F5C	A	F25H;S38E	2	106	106	2.3	1.75	4.18983	-0.483934	-0.735	-0.251	4.367	0.108
3MNJ	A	1UGB	A	A63G;E167K	2	258	258	1.75	2					1.199	6.35
1L46	A	1L56	A	K60P;E147K	2	164	164	1.7	1.8	-0.00255521	1.80182	4.035	-3.697	1.227	3.653
4RMU	A	4RMR	A	D39N;E77D	2	100	100	1.4	1.53	1.39043	3.11876
4BIR	A	1TRQ	A	W59Y;Q92H	2	104	104	1.7	2.3	1.58149	2.01084	0.336	10.952	8.023	4.754
1GDW	A	1EQE	A	G21R;D120N	2	130	130	1.8	1.8	1.95646	0.559073	1.799	2.675	6.049	1.185
1GFK	A	1I20	A	N74V;A92D	2	130	130	1.8	1.9	2.83902	-0.872234	4.632	-0.332	6.752	-3.111
2C2S	A	3EIG	A	F31R;Q35E	2	186	186	1.4	1.7	0.00489774	-0.632774	-2.783	2.201	6.13	-2.287
1WQO	A	1GFU	A	F38Y;V110D	2	130	130	1.8	1.8	-0.586208	1.16322	-1.798	0.672	1.698	0.413
2HEE	A	1GFV	A	G59I;V110N	2	130	130	1.8	1.8	-2.36065	4.97525	-3.458	10.043	1.802
2HED	A	1GF5	A	A59I;A96S	2	130	130	1.8	1.8	1.39229	1.31389	2.971	4.859	7.318	4.737
1GB2	A	1GB6	A	M2V;V74I	2	130	130	1.8	1.8	-0.28401	0.7064	-0.636	1.541	-1.35	1.952
172L	A	1L58	A	C3I;P143A	2	164	164	1.9	1.65	2.27785	1.04102	-7.004	-8.4	0.364
5JGR	A	1G0L	A	C43K;T152V	2	164	164	1.46	1.8	-2.70771	1.35433	-0.103	2.492		6.011
1CP5	A	2OH9	A	V69W;F105L	2	154	154	2.1	1.8	-2.23263	4.23014			2.591	4.775
1MLM	A	1CH2	A	I69V;L90F	2	154	154	1.8	1.8	1.94692	-0.971579			5.341
1JKB	A	1CJ8	A	A35E;T40A	2	130	130	1.66	1.8	0.823808	-0.798665	9.011	-1.409	6.478
1GB6	A	1GE4	A	I74V;N118A	2	130	130	1.8	1.8	0.829524	-0.398256	1.357	0.168	2.772	-2.416
1WQP	A	1INU	A	F45Y;V110R	2	130	130	1.8	1.8	-0.118641	0.428017	0.708	0.125	2.049	-1.809
1OUI	A	1LHL	A	A47P;A93V	2	130	130	1.8	1.8	-1.66336	4.17204	2.219	1.89	2.449	4.397
1L13	A	3CDO	B	R96V;R157T	2	164	164	1.7	1.87	1.18314	1.70231	2.684	2.392	2.536	2.849
1L47	A	3CDQ	A	R96S;E154R	2	164	164	1.7	1.68	1.463	6.58533	2.133	0.905	3.701	3.985
1GDW	A	133L	A	G21R;R115H	2	130	130	1.8	1.77	-0.0940708	1.7703	-1.271	2.402	2.688	3.066
1L22	A	1L18	A	I3Y;G124K	2	164	164	1.7	1.7	2.84041	1.09515	12.729	1.166	18.69	7.365
1ES1	A	1LR6	A	V43Y;H59V	2	82	82	2.1	1.9	1.89924	0.41061			5.283	6.662
1IP1	A	1OUD	A	A37G;V121A	2	130	130	1.8	1.8	-0.71208	2.03526	3.873	-2.946	0.24	4.373
1DTI	A	1CP5	A	D98H;L105F	2	154	154	1.7	2.1	0.279343	0.682415				10.72
2NUI	A	1EIE	A	A83D;F120W	2	124	124	1.1	1.4	0.787456	1.25382	6.02	-4.305	0.01
1B7P	A	1GF3	A	G78H;A92S	2	130	130	2	1.8	2.48522	-0.809741	4.328	-2.601
1GF6	A	134L	A	T99V;R115E	2	130	130	1.8	1.77	-0.471576	0.273844	-0.593	0.531	-0.18	3.535
1UIC	A	1FLQ	A	A15H;G117A	2	129	129	1.95	1.8	0.315952	2.00093	3.221	1.355	6.25	-1.232
1GFE	A	1YAM	A	N2V;I106V	2	130	130	1.8	1.8	3.15083	-1.59978	0.367	-0.429	1.83	1.001
1JKA	A	1BB3	A	D35E;A96L	2	130	130	1.66	1.8	2.63648	5.13255	1.596	6.03	6.145	12.26
1TDY	A	1JKC	A	W63Y;W109F	2	130	130	1.7	1.6	1.32919	1.19111	-7.687	11.83	1.456	3.284
1OUB	A	1GBW	A	A100V;V110I	2	130	130	1.8	1.8	1.57251	1.96259	1.547	3.39	5.219
2HEE	A	1B7M	A	G59I;A96M	2	130	130	1.8	2.2	4.68368	7.9921	-2.788	13.588	7.906	11.473
2Z47	A	2YYW	A	F20M;L66Y	2	107	107	1.6	1.33	0.899877	0.381577	1.366	8.883	5.355	6.751
1GF8	A	2HEE	A	S2V;I59G	2	130	130	1.8	1.8	3.54758	-1.55834	3.97	0.129	8.461	5.894
1L03	A	1L48	A	A98V;C157T	2	164	164	1.7	1.7	4.19189	3.68079	11.634	0.858	17.191
2OHA	A	1CH3	A	L90W;W139F	2	154	154	1.8	2	2.11402	1.02398			5.404	7.861
1I20	A	2MEB	A	I56L;D92A	2	130	130	1.9	1.8	-1.04636	3.46076	-5.01	8.757	-3.975	12.531
1UCL	A	1GMQ	A	T57V;T72C	2	96	96	1.82	1.8	-2.11892	3.03469	-4.09	7.216	-0.38	3.652
1IP6	A	1YAN	A	I23V;A127G	2	130	130	1.8	1.8	-0.923802	1.33466	1.341	0.546	0.428	2.867
1GB2	A	1OUJ	A	M2V;V99A	2	130	130	1.8	1.8	1.46711	-0.971809	3.938	0.101	3.223	3.075
1GB2	A	1WQQ	A	M2V;Y54F	2	130	130	1.8	1.8	0.480671	-0.377705	3.639	-3.422	2.528	2.771
1P36	A	1QT7	A	E11N;V100I	2	164	164	1.45	1.8	0.584623	3.07984	-6.686	2.777	2.92	1.891
1B7Q	A	1B7P	A	L27N;H78G	2	130	130	2	2	1.57398	1.52988	3.527	0.224
1WQN	A	1LAA	A	F20Y;D53E	2	130	130	1.8	1.77	1.30255	-0.403944	-0.459	5.916	1.89	5.155
2EYL	A	1KAB	A	S77T;K111G	2	136	136	1.7	1.8	0.560116	2.46114			2.124	12.26
1IP1	A	1GFJ	A	A37G;V74D	2	130	130	1.8	1.8	-2.65501	4.10747	2.405	4.45	0.14	4.527
1A5Q	A	1IZP	A	F46L;A93P	2	124	124	2.3	1.5	-0.635606	0.786574	5.938	-0.539		0.912
242L	A	1P46	A	A50I;M106I	2	164	164	1.8	1.67	0.235831	2.5952	9.118	3.936	3.835	2.816
1GB9	A	1B7L	A	A32L;F74V	2	130	130	1.8	1.8	5.82597	3.35058	4.735	10.329		4.65
1EQ5	A	1LAA	A	D53E;N102D	2	130	130	1.8	1.77	1.44976	-0.42605	-0.121	1.899	1.547	2.197
1QUD	A	1QUG	A	G99L;E108V	2	162	162	1.75	1.9	-3.32908	4.93741	-11.772	13.867	-8.789	11.764
1GDW	A	2MEA	A	G21R;I56F	2	130	130	1.8	2.2	6.0595	3.42774	16.313	0.841	9.396	7.441
253L	A	1P2R	A	A20D;I78V	2	164	164	2	1.58	0.313924	0.298381	0.177	0.872	7.009	3.801
1B5U	A	1GEZ	A	A9S;A24S	2	130	130	1.8	1.8	1.32669	-0.23357	3.3	-1.415	3.593	-0.565
1QUD	A	129L	A	A93T;G99L	2	162	162	1.75	1.7	-3.96527	4.48596	-10.052	9.576	-8.707	11.681
1B5V	A	1OUI	A	A51S;V93A	2	130	130	2.17	1.8	1.80444	0.0985128	4.39	0.885	0.585	6.444
1L46	A	3FI5	A	R96W;E147K	2	164	164	1.7	1.53	8.91444	2.04704	26.551	-6.852	3.799	6.86
1GBX	A	1GF0	A	A32S;L110V	2	130	130	1.8	1.8	2.74897	-1.1311	2.388	-1.341	3.703	-2.08
1GB7	A	1B5X	A	L74V;S80A	2	130	130	1.8	2	1.0878	0.233397	1.494	2.935	3.755	-0.664
1TDY	A	1GF5	A	W63Y;A96S	2	130	130	1.7	1.8	0.457698	-0.966642	-4.853	7.032	2.69	-1.93
1GBX	A	1EQ4	A	E7Q;L110V	2	130	130	1.8	1.8	1.55371	0.0973384	2.131	-0.78	0.847
1L58	A	1L12	A	A143P;T157N	2	164	164	1.65	1.7	-0.475669	2.29638	7.973	-2.627		3.068
1L42	A	1L03	A	E16K;T157C	2	164	164	1.8	1.7	1.44811	0.330296	1.31	-0.522		0.398
1FD2	A	1FRH	A	F2Y;A20C	2	106	106	1.9	2.3	3.01919	0.90879	6.3	2.818	3.156	0.408
2MEF	A	1LAA	A	D53E;M59I	2	130	130	1.8	1.77	3.03675	-0.655016	4.826	3.472	1.541	8.047
4MFH	A	1XB6	A	K24R;G121M	2	128	128	1.54	1.82	1.68086	1.59683	6.298	6.362	15.037	5.709
5JGU	A	1G0J	A	C119R;T152S	2	164	164	1.47	1.8	0.459761	0.430032	1.386	-2.24		3.421
1JKA	A	1WQQ	A	D35E;Y54F	2	130	130	1.66	1.8	1.56243	0.425955	4.039	-3.438	0.402	10.345
1GB2	A	1GFH	A	M2V;V74Y	2	130	130	1.8	1.8	0.190859	0.626972	0.23	1.123	-1.299	4.666
1GE2	A	1YAO	A	I56V;A78H	2	130	130	2	1.8	1.29166	-1.42599	2.533	-1.862		1.645
3C8S	A	1L60	A	E96R;G113A	2	164	164	1.68	1.7	1.67653	2.58454	-3.895	5.204	0.812	6.306
1L33	A	1L07	A	A131V;T157F	2	164	164	1.7	1.7	2.22535	-0.337277	5.611	-2.831	2.057	1.025
1B7R	A	1EQE	A	G58Q;D120N	2	130	130	1.8	1.8	5.84705	-0.216859	8.966	3.654	7.254	2.706
1GF0	A	1EQ4	A	E7Q;S32A	2	130	130	1.8	1.8	-0.01113	1.45824	1.738	2.586	-2.05
1B5Z	A	2MEH	A	I59T;A82S	2	130	130	2.2	1.8	3.41771	-3.08312	6.169	-7.929	4.834	-2.606
1B5Z	A	1GBY	A	A82S;V110M	2	130	130	2.2	1.8	-0.32371	0.471939	0.655	-0.912	-0.32	1.541
1L37	A	1L07	A	E115T;T157F	2	164	164	1.85	1.7	0.810414	-0.757122	7.495	-3.778	2.902	0.636
1TAY	A	1GF4	A	A63Y;V93T	2	130	130	1.7	1.8	1.41518	1.88016	2.495	-4.093	2.553	4.104
1JKB	A	1B5V	A	A35E;S51A	2	130	130	1.66	2.17	2.77658	-1.39319	12.608	-0.284	9.692	-1.521
1CV1	A	1QSB	A	A98C;M111V	2	162	162	2.1	1.8	7.84331	-0.204809	10.585	5.94		0.64
1GE0	A	1GBY	A	G38Y;V110M	2	130	130	1.8	1.8	-0.0642985	1.30232	-3.923	7.59	-3.408	8.007
1CIK	A	1MOC	A	H65T;A100I	2	154	154	1.7	2	-0.0965831	3.04533			-1.208	7.577
3P75	A	4KV6	A	D92V;R114Q	2	129	129	1.9	1.55					1.296	10.754
1DI3	A	1LHL	A	A47P;G50R	2	130	130	1.8	1.8	0.492603	0.293068	3.404	-2.263		0.063
1GF8	A	1GBY	A	S2V;V110M	2	130	130	1.8	1.8	-1.19308	1.36628	-6.528	6.818	-1.286	2.668
1GB2	A	1OUB	A	M2V;V100A	2	130	130	1.8	1.8	1.85217	2.0424	3.094	1.785	0.931	6.145
1UIC	A	1KXY	A	A15H;D18N	2	129	129	1.95	1.79	-0.579797	1.94956	1.874	1.69	1.011	2.274
1L31	A	1L97	A	I3P;R86P	2	164	164	1.8	2	4.65777	2.05897	28.385	-8.643	15.884	6.355
1GB5	A	1GF5	A	G74V;A96S	2	130	130	1.8	1.8	1.39541	-0.434983	3.882	1.797		-1.863
1A2G	A	1BEP	A	H228M;N269D	2	291	291	2.1	2.2	0.772995	6.16662			7.07
3A2G	A	4H07	A	G66T;C103K	2	154	154	1.75	1.14	-0.116106	4.09987			19.029	3.019
1KVA	A	1RDA	A	D10N;A134D	2	155	155	1.8	2.15	-0.410173	0.988738	-2.4	-0.888		4.663
1GB2	A	1D6Q	A	M2V;D102E	2	130	130	1.8	1.96	-0.901668	0.859643	-2.013	2.144	-1.108
3BIR	A	1RGK	A	E46Q;N92H	2	104	104	1.8	1.87	3.79328	0.641617	10.124	3.699	2.182	7.28
2MEA	A	1GF4	A	F56I;V93T	2	130	130	2.2	1.8	5.43463	8.93761	2.48	12.549	9.952	6.097
1B5X	A	2MEH	A	I59T;A80S	2	130	130	2	1.8	2.95616	-2.03799	7.157	-5.374	5.959	-3
1D6P	A	1GB7	A	L63Y;V74L	2	130	130	2.23	1.8	-0.442502	0.100905	-0.996	2.344		3.348
1B5Y	A	2MEE	A	A36S;I59L	2	130	130	2.2	1.8	-0.348771	2.50605	1.048	1.122	3.717	4.454
3ZOO	A	5TY3	A	F46Y;K72A	2	104	104	1.35	1.25	-0.0635593	0.399538	-6.387	5.978	1.775
1GAO	A	1FRJ	A	F25I;S44L	2	106	106	2.2	2.3	0.0591938	2.22118	-2.806	6.034		8.107
1L22	A	1L14	A	G124K;T157S	2	164	164	1.7	1.7	-0.488059	-0.459941	4.772	-1.56	1.693	1.586
1GFE	A	1INU	A	N2V;V110R	2	130	130	1.8	1.8	1.61234	0.547482	-0.044	0.364	1.385	0.64
1B7R	A	1BB3	A	G58Q;A96L	2	130	130	1.8	1.8	7.37571	3.8524	8.735	7.891	13.591	10.078
2B6T	A	1CV4	A	A99L;L118M	2	162	162	2.1	1.9	-3.70407	4.34783	-3.063	5.78	-2.356
1IOT	A	1FN5	A	L12M;G49A	2	129	129	1.75	1.78	2.64887	-2.77557	-0.517	-1.82	8.394	-3.281
1LHJ	A	1GFH	A	V74Y;G103P	2	130	130	1.8	1.8	-0.378976	1.48984	5.273	-0.279	9.273	5.225
1OUJ	A	1WQM	A	A99V;Y124F	2	130	130	1.8	1.8	-0.665859	2.36173	3.049	0.11	4.414	4.002
150L	A	1L27	A	I6M;P86D	2	164	164	2.2	1.8	2.47784	4.64447	-3.313	15.648	7.743
1GB5	A	1JKD	A	G74V;W109A	2	130	130	1.8	1.8	6.06146	-2.03701	1.909	6.453		4.566
1YAP	A	1B7L	A	A32L;V59I	2	130	130	1.8	1.8	4.80818	4.6347	6.173	8.5	8.927	7.616
1G0E	A	1UGF	A	A62H;A63T	2	258	258	1.6	2	2.08656	-0.944797			5.752	10.678
1RSE	A	1XCH	A	D92S;L104N	2	153	153	1.7	1.7	2.99585	-2.10296	3.289	-5.472	7.717	2.835
2NXR	A	5JEP	B	F5Y;T196S	2	258	258	1.7	1.19		-1.29437			2.348
3C81	A	1L60	A	A85K;G113A	2	164	164	1.85	1.7	-1.23234	1.60643	-0.692	4.141	-1.18	2.424
1FN5	A	1FLW	A	A49G;G71A	2	129	129	1.78	1.81	-0.540432	1.81121	-0.681	-1.078	-0.385
1TAY	A	1LAA	A	D53E;A63Y	2	130	130	1.7	1.77	-0.0353239	1.08863	-1.805	5.027	0.474	7.795
1B7Q	A	1D6Q	A	L27N;D102E	2	130	130	2	1.96	1.2937	-0.0830279	2.813	1.457
2BQN	A	2BQD	A	I56V;A93V	2	130	130	1.8	1.8	0.971644	0.609117	1.514	-0.377	9.641	4.325
2BQM	A	2BQE	A	I59V;A74V	2	130	130	1.8	1.8	1.16223	-0.422856	2.944	-0.419	3.37	1.739
2MGI	A	2OH8	A	I29W;T65H	2	154	154	2	1.8	5.83728	2.67723			13.089	8.353
1GFE	A	2HEA	A	N2V;I106A	2	130	130	1.8	1.8	4.7979	-1.49607	3.305	6.122	3.296	3.413
2HEF	A	1LHL	A	A47P;A89I	2	130	130	1.8	1.8	-3.7629	5.27725	0.525	4.872	2.112	5.243
2MEE	A	1YAN	A	I23V;L59I	2	130	130	1.8	1.8	3.19144	-1.4309	4.041	-0.59	2.834	4.929
165L	A	1QS9	A	A98V;A117S	2	162	162	1.75	1.85	6.84461	0.814634	15.909	-4.032		0.82
3OJ1	A	3MYM	A	D55H;M86E	2	137	137	1.52	1.72	2.90458	-0.960905	3.662	0.433	1.017	10.796
1B5U	A	1B5Y	A	A24S;S36A	2	130	130	1.8	2.2	1.3713	-0.203477	-0.406	0.5	1.695	1.067
5C4Z	A	3P75	A	H19L;V92D	2	129	129	1.62	1.9						8.548
1B5V	A	1BB3	A	A51S;A96L	2	130	130	2.17	1.8	4.54429	4.9291	3.973	6.972	6.682	8.986
1WQO	A	1GFJ	A	F38Y;V74D	2	130	130	1.8	1.8	0.483011	0.256691	-0.924	7.376	4.589	0.188
1B5W	A	1EQE	A	A61S;D120N	2	130	130	2.17	1.8	0.999966	0.0211037	2.532	0.664	3.733	2.012
1GB2	A	1LHI	A	M2V;P71G	2	130	130	1.8	1.8	2.6977	7.88807	0.466	11.344	2.451	110.064
1JKB	A	1D6Q	A	A35E;D102E	2	130	130	1.66	1.96	1.41416	0.298657	7.173	-2.701	5.852
3HCX	A	3HSJ	A	A10N;N55A	2	158	158	1.75	1.18	1.05666	3.71774	0.976	2.73	3.445	9.179
2IAS	A	2IAQ	A	F242W;S269A	2	312	312	2	2.1	1.05058	-0.0606526			3.788	7.711
1B5Y	A	1EQ4	A	E7Q;A36S	2	130	130	2.2	1.8	0.196727	1.23399	4.023	-3.735	0.245
5JGR	A	216L	B	C43K;S44W	2	164	164	1.46	2.1	-1.02176	1.35593	5.369	-6.794		4.377
1OUG	A	1GE2	A	A2V;H78A	2	130	130	1.8	2	0.494776	0.346642	-2.332	3.552	0.516
1EIC	A	4RSD	A	A120F;D121A	2	124	124	1.4	1.6	-4.13413	5.79708	-4.974	6.258	2.459	11.425
1B5Y	A	1GE1	A	A36S;Q58A	2	130	130	2.2	1.7	-0.300232	1.69505	4.218	-1.754	2.535	2.302
3A2G	A	109M	A	C103K;D123N	2	154	154	1.75	1.83	-1.9067	2.05299			-1.459	5.155
1CJ8	A	1OUI	A	A40T;V93A	2	130	130	1.8	1.8	2.4942	-1.72057	2.426	0.231		3.627
1GBY	A	1CJ7	A	T11V;M110V	2	130	130	1.8	1.8	-0.337479	0.668389	1.452	-0.257	-0.139
1D6Q	A	2MEE	A	I59L;E102D	2	130	130	1.96	1.8	-0.0199027	1.69508	-0.69	2.125		-0.554
1OUH	A	1GF0	A	A32S;A74V	2	130	130	1.8	1.8	0.87638	0.195946	4.645	0.162	3.563	-1.074
1DI3	A	133L	A	G50R;R115H	2	130	130	1.8	1.77	2.04042	1.11131	-0.486	1.532		1.324
1GDW	A	1GBZ	A	G21R;V110F	2	130	130	1.8	1.8	0.0844489	1.26574	2.005	0.206	4.089
3L64	A	2NTH	A	E44S;L118C	2	164	164	1.9	1.8	3.43584	-2.61993	7.69	-3.204	7.958	-6.802
1FD2	A	1FRI	A	A20C;D23N	2	106	106	1.9	2.1	0.624788	1.0661	1.717	1.566	3.276	4.05
3HCX	A	1HQ2	A	A10N;R82A	2	158	158	1.75	1.25	2.5109	4.45742	0.281	8.774	3.938	8.173
1GBZ	A	1EQ5	A	D102N;F110V	2	130	130	1.8	1.8	0.464519	-0.497293	-3.218	3.937		3.688
1CKC	A	1GEV	A	L8T;A43T	2	130	130	1.8	2.1	7.71568	-0.358716	12.038	-3.365	14.005	-3.506
1L26	A	4W51	A	C86P;L99A	2	164	164	1.7	1.45	3.60786	-1.0537	20.852	-9.828	10.991
1QUD	A	1L77	A	G99L;M102L	2	162	162	1.75	2.05	-3.55458	4.60379	-9.53	11.217	-9.608	11.999
3ZOO	A	3NWV	A	G41S;F46Y	2	104	104	1.35	1.9	7.48407	-2.48245	3.332	1.464	5.552	0.289
1L19	A	1L16	A	D38S;G156D	2	164	164	1.7	1.7	11.3727	-8.04263	7.785	-2.248	10.555	-1.05
1B7R	A	1JKC	A	G58Q;W109F	2	130	130	1.8	1.6	5.33985	1.1727	5.249	9.413	6.799	5.498
1GAY	A	1GB5	A	G2V;V74G	2	130	130	1.8	1.8	0.737706	0.729833	-1.537	5.703	-1.566
1OUC	A	1LYY	A	D67H;A110V	2	130	130	1.8	1.8	4.32645	-0.934074	7.345	-2.482	12.873	0.024
1L29	A	1L38	A	H86P;Q123E	2	164	164	1.7	1.8	1.07442	2.3412	13.309	-1.475	7.163	3.574
2HEB	A	2HEC	A	A23I;I56A	2	130	130	2.2	1.8	1.06566	-0.111518	1.357	2.831	5.734	3.477
1GE0	A	1EQE	A	G38Y;D120N	2	130	130	1.8	1.8	1.67014	1.77848	-1.467	7.01	-1.218	7.755
3C7Y	A	1L58	A	A96R;P143A	2	164	164	1.95	1.65	-0.205144	0.370707	-6.507	6.029	-0.234
1CKC	A	1B7L	A	A32L;A43T	2	130	130	1.8	1.8	6.79429	4.29466	7.268	6.715	12.805	3.55
1GB8	A	1GF7	A	M74V;V100T	2	130	130	1.8	1.8	2.03394	1.67177	5.699	-2.176	2.118	1.221
1SY0	A	5HWZ	A	D30N;V121T	2	184	184	1.15	1.45	-0.595651	3.00839	2.956	-5.933	4.925
1F2Z	A	1KAB	A	A110Y;A111G	2	136	136	1.8	1.8	0.060295	3.32995			0.773	13.747
1G6B	A	1D3W	A	D15E;S47P	2	106	106	1.9	1.7	-1.76379	2.0183	0.697	-1.634	8.961
1JKA	A	2MEC	A	D35E;I56M	2	130	130	1.66	2.2	-0.5072	1.35506	2.066	1.246	0.236	7.706
1L58	A	1L48	A	A98V;A143P	2	164	164	1.65	1.7	0.685721	3.93387	13.274	-3.966
1GBZ	A	1B7L	A	A32L;F110V	2	130	130	1.8	1.8	8.38144	2.57885	4.943	9.85		6.609
4MU5	A	5EYS	A	F104W;W142M	2	148	148	1.8	1.75	1.08606	6.38499			6.48
1B7Q	A	1GF5	A	L27N;A96S	2	130	130	2	1.8	3.2826	-1.72766	5.842	-1.801		-4.112
1GFG	A	1GF5	A	R2V;A96S	2	130	130	1.8	1.8	1.41488	-2.10143	1.054	0.319	1.815	-0.072
1DI3	A	1GFR	A	G50R;V74R	2	130	130	1.8	1.8	2.26661	-0.705894	2.165	-2.425		-0.259
1GDW	A	1LOZ	A	G21R;I56T	2	130	130	1.8	1.8	4.23973	-2.19048	5.979	-3.382	10.836	-0.009
1CKC	A	1INU	A	A43T;V110R	2	130	130	1.8	1.8	0.792816	1.26383	5.107	-1.956	5.47	-2.542
1GFK	A	1GFV	A	N74V;V110N	2	130	130	1.8	1.8	-0.394031	0.71254	0.389	2.639	0.235
1EO5	A	1CXL	A	A229D;A257Q	2	686	686	2	1.81	0.126149	-0.116552	2.552	-10.48
1L33	A	1L09	A	A131V;T157H	2	164	164	1.7	1.7	2.40359	-0.719563	3.031	-0.525	1.744	0.566
1EQE	A	1GEZ	A	A9S;N120D	2	130	130	1.8	1.8	0.71679	0.620742	1.834	0.606	3.291	-0.502
1GF8	A	2MEC	A	S2V;I56M	2	130	130	1.8	2.2	-0.760346	3.03499	-4.444	4.975	0.894	4.229
2HEA	A	1GBY	A	A106I;V110M	2	130	130	1.8	1.8	-1.73747	3.54549	2.964	7.705	1.214	4.462
1GB3	A	1IP4	A	F2V;G72A	2	130	130	1.8	1.8	1.36929	0.180333	-3.859	8.976	2.668	-0.93
2G78	A	1CBS	A	K132R;F134Y	2	137	137	1.7	1.8	0.631067	1.8989	-1.187	7.376	6.241
3C8S	A	1L56	A	K60P;E96R	2	164	164	1.68	1.8	1.2577	3.92932	0.164	1.051	2.836	5.714
1B7R	A	1GBZ	A	G58Q;V110F	2	130	130	1.8	1.8	3.12295	0.631714	11.108	-0.788	6.657
3C8R	A	1L98	A	G96R;Q105E	2	164	164	1.8	1.8	-3.75565	3.76034	-4.284	5.954	2.259	3.025
2HED	A	1GBX	A	A59I;V110L	2	130	130	1.8	1.8	-0.563982	2.75949	-2.049	4.936	1.731	7.299
3LI4	A	2IAW	A	D118N;N227D	2	312	312	1.35	1.74	-1.53711	0.697382			5.714	4.003
2HOH	A	4HOH	A	A9N;T93A	2	104	104	1.9	2.05	-0.417251	0.647334	-1.89	2.928	-1.504	3.098
1YAM	A	2MEB	A	I56L;V106I	2	130	130	1.8	1.8	-1.20067	2.67851	-0.687	4.504	0.749	6.411
1GB0	A	1WQN	A	L2V;Y20F	2	130	130	1.8	1.8	0.19898	-0.000290091	2.771	0.211		-0.435
3N2J	A	3FQY	A	C112D;G117H	2	128	128	1.35	1.9	11.1872	3.00752	5.344	1.714	4.372	10.482
2NXR	A	5JES	B	F5Y;V119T	2	258	258	1.7	1.21	2.68966	-2.66584			4.246
172L	A	1L16	A	C3I;G156D	2	164	164	1.9	1.7	9.89734	-0.943829	0.226	-13.227	10.222	1.723
1D6P	A	1CJ7	A	T11V;L63Y	2	130	130	2.23	1.8	-0.0135186	0.845379	0.769	0.864
1GFR	A	1B5X	A	R74V;S80A	2	130	130	1.8	2	0.815858	0.189633	-1.596	4.1	2.338	0.522
1DTI	A	1CPW	A	D98H;L105W	2	154	154	1.7	2.2	0.0793691	0.680324
3C8R	A	1L22	A	G96R;K124G	2	164	164	1.8	1.7	-3.07998	2.74124	-5.778	5.839	-2.689	6.499
1MLM	A	2SPO	A	L30V;I69V	2	154	154	1.8	1.7	2.61788	-1.77048			10.825	-0.601
1IOS	A	1IR8	A	F12M;I58M	2	129	129	1.76	1.63	1.37092	1.45484	5.671	3.009	13.511	-3.924
1B5U	A	1EQ5	A	A24S;D102N	2	130	130	1.8	1.8	0.332485	1.00616	1.061	0.563	-1.43	4.359
1GB7	A	1GFV	A	L74V;V110N	2	130	130	1.8	1.8	0.425927	0.16665	3.835	1.732	2.036
164L	A	1QUG	A	E108V;A119R	2	162	162	1.8	1.9	0.473413	0.2118	-6.319	6.468	1.156	2.248
1GFT	A	1GF5	A	A96S;Y110V	2	130	130	1.8	1.8	1.75366	-2.05964	1.137	1.312	3.4	-2.586
1IP5	A	1YAP	A	I59V;A105G	2	130	130	1.8	1.8	-1.02357	3.64698	2.907	0.899	2.514	0.254
1I2G	A	4HOH	A	T16V;T93A	2	104	104	1.85	2.05	-1.89036	1.92622	-3.413	4.589	-0.717	5.184
3OO0	A	1EHC	A	D12K;P112A	2	128	128	1.55	2.26	0.579931	0.680018			9.2	7.081
1WQN	A	1GF7	A	F20Y;V100T	2	130	130	1.8	1.8	2.35273	1.47674	1.729	2.401	2.437	0.387
1KXW	A	1HER	A	D27N;T40S	2	129	129	1.96	1.8	1.59991	-0.61634	1.21	2.904	0.704	5.222
1GB2	A	2HEA	A	M2V;I106A	2	130	130	1.8	1.8	3.07747	-1.1504	4.907	4.55	3	2.143
1LHL	A	1GF9	A	V2Y;P47A	2	130	130	1.8	1.8	2.07889	-1.13884	-1.591	0.221	1.726	-0.167
1ZYT	A	1QT7	A	E11N;C82A	2	164	164	1.7	1.8	0.497833	2.85718	-2.578	1.792		0.826
2HEC	A	2HEE	A	A56I;I59G	2	130	130	1.8	1.8	1.17561	1.52842	5.615	1.049	7.886	7.582
1WQQ	A	1IP5	A	F54Y;G105A	2	130	130	1.8	1.8	2.77168	-1.10215	-5.114	4.547	3.795	2.644
3QOJ	A	3P75	A	K17V;V92D	2	129	129	1.6	1.9					2.206	12.718
1L44	A	1L48	A	A98V;E119R	2	164	164	1.7	1.7	4.31427	1.59423	17.25	-2.526
1JKD	A	2MEB	A	I56L;A109W	2	130	130	1.8	1.8	-3.59415	7.09856	2.08	5.704	2.506	14.26
1GB3	A	1GFR	A	F2V;V74R	2	130	130	1.8	1.8	0.277534	0.720384	-2.15	6.311	2.45	2.03
2RGB	A	4EFM	A	G12V;K61Q	2	166	166	1.35	1.9	0.958934	0.726596	-0.721	5.06		2.522
3CDT	A	1L12	A	N96R;T157N	2	164	164	1.63	1.7	0.796049	1.99598	2.018	5.796	1.765	5.957
1GB2	A	1B5Y	A	M2V;S36A	2	130	130	1.8	2.2	0.218147	0.0525595	-2.276	2.377	0.715	0.786
1GE1	A	2HEA	A	A58Q;I106A	2	130	130	1.7	1.8	3.82236	-0.989998	4.878	7.023	5.097	3.019
133L	A	1LHL	A	A47P;H115R	2	130	130	1.77	1.8	0.383851	0.457901	3.907	-3.046	0.29	-1.473
2HOH	A	1RHL	A	A9N;G23A	2	104	104	1.9	1.95	4.23193	2.41774	3.788	5.427	2.124	6.622
1GE2	A	1IP6	A	A78H;G127A	2	130	130	2	1.8	2.37329	-2.09596	1.543	-0.669		0.062
1GE2	A	1GEV	A	L8T;A78H	2	130	130	2	2.1	5.66039	-1.01953	11.039	-2.688		-1.857
2A4T	A	237L	A	C131V;V149A	2	164	164	1.7	1.7	1.85707	-1.9274	3.446	-3.442	1.461	-2.987
2PC8	A	1EQP	A	L58S;Q286E	2	394	394	1.8	1.9	3.18552	-2.17909
1OUC	A	1GE4	A	A110V;N118A	2	130	130	1.8	1.8	0.892536	-0.890269	0.156	0.084	2.831	-1.301
1D6P	A	1GF4	A	L63Y;V93T	2	130	130	2.23	1.8	2.28817	0.343492	2.527	-5.831		1.522
1L21	A	1L08	A	G55N;T157G	2	164	164	1.85	1.7	2.42039	-0.679216	5.631	-0.215		-0.812
1L58	A	1L03	A	A143P;T157C	2	164	164	1.65	1.7	0.0788126	1.8741	7.739	-4.51		1.13
1OUI	A	1WQM	A	A93V;Y124F	2	130	130	1.8	1.8	-0.58166	2.1854	3.389	0.63	7.128	2.851
1L28	A	1L10	A	G86P;T157I	2	164	164	1.9	1.7	2.53469	2.49692	17.738	-0.455	8.156	1.059
1FLQ	A	3OJP	A	D52N;A117G	2	129	129	1.8	1.81	-0.586801	3.48378	-1.325	2.357	-4.872	7.875
1JKB	A	1GB8	A	A35E;V74M	2	130	130	1.66	1.8	2.82897	-0.400825	6.769	0.592	6.588	0.955
1YAQ	A	2MEI	A	I59Y;V89I	2	130	130	1.8	1.8	9.69827	5.09083	12.619	6.666	20.643	9.13
1L38	A	1L46	A	E123Q;K147E	2	164	164	1.8	1.7	-1.04097	0.463186	-2.36	0.639	3.289	0.842
1GE0	A	1B5V	A	G38Y;S51A	2	130	130	1.8	2.17	1.5158	1.54803	0.993	7.774	-1.275	5.421
3F8V	A	1L20	A	H96R;N144D	2	164	164	1.08	1.85	-2.88933	10.7926	0.334	18.388	2.222	9.926
1C9X	A	1IZQ	A	F46V;A119H	2	124	124	1.8	1.8	3.91959	4.16621	5.927	10.04		1.187
2OHB	A	101M	A	F47V;W108I	2	154	154	1.8	2.07	6.34916	10.2558			14.682	14.533
1CNI	A	5JE7	B	A89Q;F127Y	2	257	257	1.8	1.15		-0.306066			0.679
1IP3	A	1CJ9	A	T40V;A68G	2	130	130	1.8	1.8	-1.73982	3.29243	-0.661	1.75	5.311
1KXW	A	1IR8	A	D27N;I58M	2	129	129	1.96	1.63	1.58738	1.55415	6.096	2.272	8.418	2.113
1JKD	A	1GBW	A	A109W;V110I	2	130	130	1.8	1.8	-4.24295	5.75398	1.253	2.822	1.659
6CCP	A	1CCL	A	K45R;F199K	2	291	291	2.2	2	2.20777	-1.04645				-6.351
242L	A	1G0J	A	A50I;T152S	2	164	164	1.8	1.8	-0.354494	2.02329	9.158	1.518	2.836	5.118
4W51	A	1L48	A	A98V;A99L	2	164	164	1.45	1.7	0.859424	5.20107	7.549	6.257
1GF8	A	1YAP	A	S2V;I59V	2	130	130	1.8	1.8	0.555082	1.16536	-3.136	6.263	0.736	0.161
1GAY	A	2MEI	A	G2V;I59Y	2	130	130	1.8	1.8	13.4119	3.76779	12.88	8.88	10.853	10.512
1CKC	A	1GFH	A	A43T;V74Y	2	130	130	1.8	1.8	0.883767	1.52135	5.265	1.473	7.126	4.182
1GBY	A	1GF5	A	A96S;M110V	2	130	130	1.8	1.8	2.23288	-1.83018	4.616	-1.345	4.182	-2.057
5JEP	B	1CAK	A	E104Q;S196T	2	258	258	1.19	1.9	2.1938
5JDV	B	1UGA	A	A63F;W128F	2	258	258	1.34	2	0.541162					5.374
4QK2	A	5JDV	B	F128W;P231E	2	258	258	1.52	1.34		-0.400683			3.741
1GFT	A	1LAA	A	D53E;Y110V	2	130	130	1.8	1.77	2.18937	-1.05295	-1.269	4.963	-0.179	3.626
2IN0	A	2IN8	A	D24G;D121G	2	139	139	1.6	1.7					1.623	7.953
1GB5	A	1INU	A	G74V;V110R	2	130	130	1.8	1.8	0.465651	1.5315	0.759	0.356		-0.885
1JKC	A	1LOZ	A	I56T;F109W	2	130	130	1.6	1.8	4.9784	-1.71977	11.76	-6.971	10.03	1.571
1GFJ	A	2MEI	A	I59Y;D74V	2	130	130	1.8	1.8	15.3584	3.58953	19.549	5.517	13.509	10.464
5CC9	A	2ANQ	A	F28L;N37D	2	159	159	1.2	2.13	0.343849	-0.159418	-2.773	1.145		-1.915
1GFG	A	1GE3	A	R2V;N118G	2	130	130	1.8	1.8	0.541558	1.49014	0.052	2.865	-1.198	3.937
1OUJ	A	1B7N	A	E35L;A99V	2	130	130	1.8	1.8	-4.08661	5.63205	-2.647	9.416	3.925	8.447
2MEH	A	1LAA	A	D53E;T59I	2	130	130	1.8	1.77	-2.27221	2.63162	-5.309	7.703	-3.728	9.585
1GDX	A	1GBY	A	A21R;V110M	2	130	130	1.8	1.8	-1.02882	1.14107	-1.079	0.241	1.683	1.64
1GAZ	A	1OUI	A	I2V;V93A	2	130	130	1.8	1.8	2.63179	-1.04011	3.597	-0.862	2.667	4.935
4QK2	A	1UGA	A	A63F;P231E	2	258	258	1.52	2					5.348	6.886
1GE2	A	1CKD	A	T43V;A78H	2	130	130	2	1.8	-0.117535	0.906316	-1.969	1.857
2MED	A	1TAY	A	F59I;Y63A	2	130	130	1.8	1.7	5.19896	7.41963	5.949	9.571	13.593	7.01
1L16	A	1L04	A	D156G;T157D	2	164	164	1.7	1.7	-2.70965	9.9978	0.81	5.079	1.386	3.827
4HSW	A	3KUO	A	C73S;F100L	2	137	137	1.22	1.26	2.21819	-1.79145	3.481		6.005	0.982
3WW6	A	193L	A	D46N;S52D	2	129	129	1.53	1.33	0.769902	0.453172	4.611	5.468	2.275	4.669
7RNT	A	1I3I	A	W45Y;V78T	2	104	104	1.9	1.76	1.83701	-2.84575	-4.326	4.539		-2.79
1P36	A	216L	B	S44W;V100I	2	164	164	1.45	2.1	-0.885877	1.42776	3.851	-3.887	0.926	3.54
1GF8	A	1WQO	A	S2V;Y38F	2	130	130	1.8	1.8	-0.1659	0.0362164	-2.178	2.391	-2.255	4.158
1B7R	A	1B7P	A	G58Q;H78G	2	130	130	1.8	2	3.24807	1.89346	7.352	5.143	5.23
1L65	A	1QUG	A	A47D;E108V	2	162	162	1.7	1.9	0.181654	-0.303343	-4.869	2.776		2.194
1CKC	A	1GF4	A	A43T;V93T	2	130	130	1.8	1.8	2.2612	0.66953	5.922	-5.075	6.666	0.626
1IP2	A	2HEC	A	A48G;I56A	2	130	130	1.8	1.8	3.31274	-3.71633	8.314	-6.565	5.727	-2.472
1TCY	A	1CKH	A	F63Y;T70V	2	130	130	1.7	2	0.272672	1.32103	-1.86	5.555	5.062
207L	A	1B7P	A	A77C;H78G	2	130	130	1.8	2	0.804002	6.2003	1.791	-1.532	5.261
150L	A	1L00	A	I6M;Q105A	2	164	164	2.2	1.9	0.49372	2.68503	1.007	4.092	5.476	1.358
1I1Z	A	1IP6	A	D86Q;G127A	2	130	130	1.8	1.8	3.32726	-1.67919	1.533	2.13	1.057	2.1
1D6Q	A	1CKH	A	T70V;E102D	2	130	130	1.96	2	2.13037	1.10102	4.416	3.322
1OUI	A	1B7M	A	A93V;A96M	2	130	130	1.8	2.2	4.25942	5.82068	1.884	7.15	8.916	4.839
1GE1	A	1GFT	A	A58Q;V110Y	2	130	130	1.7	1.8	0.447443	1.31525	2.17	1.26	2.26	1.967
1GB6	A	1YAQ	A	I74V;I89V	2	130	130	1.8	1.8	2.14032	-0.594856	3.203	-1.609	2.864	2.672
2HED	A	134L	A	A59I;R115E	2	130	130	1.8	1.77	1.1466	1.79477	-3.338	5.774	7.457	6.313
1QSB	A	1LYE	A	T59V;C98A	2	162	162	1.8	1.8	0.3364	2.93014	-2.722	4.929	1.44
3C7Z	A	3C8S	A	A89D;H96E	2	164	164	1.67	1.68	-0.410812	5.41351	-0.053	19.999	6.471	3.352
2HEE	A	1GF7	A	G59I;V100T	2	130	130	1.8	1.8	-0.362674	5.95551	-1.214	8.505	3.452	10.234
3CDT	A	1L24	A	A82P;N96R	2	164	164	1.63	1.7	-2.11507	2.77543	2.671	1.082	-1.602
1A6L	A	1G6B	A	C14T;P47S	2	106	106	2.1	1.9	4.70979	1.25051	12.932	3.526	2.443	9.894
109M	A	3H57	A	H65L;V69N	2	154	154	1.83	1.7	-0.740841	1.78397			2.511	3.752
1B5W	A	1GF7	A	A61S;V100T	2	130	130	2.17	1.8	1.9239	2.39464	2.416	-0.92	3.535	3.02
242L	A	1PQO	A	A50I;L118I	2	164	164	1.8	1.65	0.175369	0.574963	8.658	3.861	10.202	2.462
1JKB	A	1WQO	A	A35E;Y38F	2	130	130	1.66	1.8	1.09176	-0.334772	11.135	-3.117	6.281	2.244
1QS9	A	1D2Y	A	I50M;V98A	2	162	162	1.85	2.06	1.21402	4.93511	-0.756	21.365	5.561	13.849
1B7M	A	1LHK	A	D91P;M96A	2	130	130	2.2	1.8	3.18312	7.32556	9.215	-1.502	3.902	8.108
1GFG	A	1TDY	A	R2V;Y63W	2	130	130	1.8	1.7	0.0239084	-1.18132	5.741	-4.659	-0.493	2.204
2HOH	A	4RNT	A	A9N;H92A	2	104	104	1.9	2.2	0.911884	0.016686	-0.626	0.833	0.526	11.101
1TAY	A	1GBW	A	A63Y;V110I	2	130	130	1.7	1.8	-0.770105	2.10789	-0.777	2.401	1.018
4RMW	A	4RMQ	A	D60N;A77D	2	100	100	1.4	1.46	0.536043	0.412172
1WQQ	A	1EQ5	A	F54Y;D102N	2	130	130	1.8	1.8	-0.527789	1.01264	-4.627	2.997	0.572	3.783
1B7S	A	1IP7	A	S74V;G129A	2	130	130	2	1.9	2.86843	-1.47463	-0.173	3.32		-0.152
1MLQ	A	1CPW	A	L69V;L105W	2	154	154	2	2.2	1.46855	-1.02624			5.096
150L	A	1L44	A	I6M;R119E	2	164	164	2.2	1.7	0.965015	2.63551	0.412	-4.973	4.363
2AT0	X	1SXU	A	D30N;V133L	2	184	184	1	1.4	-4.43937	2.57638	-2.843	3.059	-4.106	7.409
1WQP	A	1GBW	A	F45Y;V110I	2	130	130	1.8	1.8	-0.158348	0.231838	-1.026	2.004	0.554
1CH2	A	1CO9	A	F90L;L105V	2	154	154	1.8	1.6	1.29164	-1.95956
2HEB	A	1B5U	A	A23I;S24A	2	130	130	2.2	1.8	-2.51748	3.62151	-5.108	9.454	2.566	5.137
1B7Q	A	1CKH	A	L27N;T70V	2	130	130	2	2	3.50552	0.919555	5.771	4.449
1CAL	A	1UGF	A	A63T;A196T	2	258	258	2.2	2						9.909
1FD2	A	1FRM	A	A20C;E46A	2	106	106	1.9	2.3	1.05149	0.971258	1.217	1.116	3.589	1.21
1QT8	A	1P36	A	H26T;I100V	2	164	164	1.9	1.45	2.48612	8.03262	4.238	8.064	6.935	2.723
1GFR	A	1EQ4	A	E7Q;R74V	2	130	130	1.8	1.8	0.669484	-0.0285221	1.465	0.68	0.743
1OUJ	A	1GF0	A	A32S;A99V	2	130	130	1.8	1.8	-0.236702	1.30697	1.559	2.31	6.658	1.186
1JKC	A	1EQ4	A	E7Q;F109W	2	130	130	1.6	1.8	2.26496	1.47195	7.995	-2.227	2.628
1GFK	A	1GF4	A	N74V;V93T	2	130	130	1.8	1.8	2.3753	0.679809	4.189	-3.502	1.832	0.449
1QTZ	A	1L54	A	C20D;M102K	2	164	164	2	1.9	2.07199	-1.86109	4.9	-6.153	7.914	-4.493
1CO8	A	1CH3	A	L90W;A105L	2	154	154	1.8	2	-2.50324	3.19407				10.01
1CH7	A	2OHB	A	F98H;I108W	2	154	154	1.9	1.8	3.32758	1.59695			4.319	3.32
3CDR	A	1L16	A	Q96R;G156D	2	164	164	1.7	1.7	6.4087	-2.07827	-0.63	0.766	6.692	-3.076
3L64	A	2IGC	A	E44S;T115C	2	164	164	1.9	1.4	0.992448	-0.190673	1.581	1.798	3.546	0.163
1GFU	A	2MEF	A	I59M;D110V	2	130	130	1.8	1.8	1.14878	1.64256	-0.681	4.741	7.414	2.258
1GAY	A	2MED	A	G2V;I59F	2	130	130	1.8	1.8	9.13299	4.12459	5.507	9.721	4.444	12.845
2MED	A	1B7N	A	E35L;F59I	2	130	130	1.8	1.8	1.05449	8.05129	1.466	9.867	11.327	17.145
1B5Z	A	1GBW	A	A82S;V110I	2	130	130	2.2	1.8	-0.280373	0.185949	1.72	-2.793	-0.601
1FYS	A	2AAD	A	C16V;H40K	2	104	104	2	2	-3.46544	3.73777	0.107	4.907	0.174	4.521
2HEF	A	1CJ7	A	T11V;A89I	2	130	130	1.8	1.8	-3.95593	4.20811	-2.527	5.632	3.01
1B7S	A	1GF9	A	V2Y;S74V	2	130	130	2	1.8	0.781976	0.404813	2.944	0.221		3.01
2QUZ	A	4EFM	A	G12V;R117K	2	166	166	1.49	1.9	-0.163724	-0.167685	-1.863	1.006	2.25	2.098
1GAZ	A	1GBX	A	I2V;V110L	2	130	130	1.8	1.8	-0.0344356	0.211909	0.071	-0.085	0.716	-0.152
1D6P	A	1LOZ	A	I56T;L63Y	2	130	130	2.23	1.8	4.01489	-2.08533	4.879	-2.874		0.886
1M6C	A	1MYI	A	K45S;N68V	2	153	153	1.9	2	0.514856	-1.05336	-2.91	2.63	0.835	2.591
1CJ8	A	1I1Z	A	A40T;Q86D	2	130	130	1.8	1.8	0.456696	-0.20937	0.809	1.414		-5.486
1L53	A	1L02	A	C149V;T157A	2	164	164	1.85	1.7	-1.56085	1.14624	0.437	0.264	-0.217	-0.049
2BQB	A	207L	A	A95C;V106I	2	130	130	1.8	1.8	-1.21887	1.94406	-2.581	2.831	2.678	0.595
1KVB	A	1RDA	A	D10N;H134D	2	155	155	1.9	2.15	0.0301259	4.55728	1.937	0.77	4.014	5.449
3PWB	A	3UNS	A	E195S;I205F	2	223	223	1.63	1.8
1B5Y	A	1GB9	A	A36S;V74F	2	130	130	2.2	1.8	0.0315112	2.07233	4.906	-3.523	-0.821
1U9M	A	1M59	A	P38V;W56F	2	82	82	2	1.9	2.93779	-2.98263			4.763	-3.268
3C7Y	A	1L46	A	A96R;K147E	2	164	164	1.95	1.7	-1.13134	1.89914	-2.894	5.64	0.092	3.338
1BNF	A	2F4Y	A	C68T;C90S	2	108	108	2	2.15		0.907768		-3.506		4.089
1QTZ	A	5JGR	A	C20D;K43C	2	164	164	2	1.46	-1.71104	1.52663	-3.309	4.998	2.438
1GE0	A	2MEE	A	G38Y;I59L	2	130	130	1.8	1.8	0.115164	4.2744	-2.966	10.566	2.98	7.729
1OUH	A	1GE4	A	A74V;N118A	2	130	130	1.8	1.8	0.770088	-0.06069	1.802	1.22	2.236	-0.656
1DI3	A	2MEH	A	G50R;I59T	2	130	130	1.8	1.8	5.11828	-3.99807	6.454	-5.502		-4.636
1OUC	A	1GF3	A	A92S;A110V	2	130	130	1.8	1.8	0.809812	-0.684236	3.724	-4.196	3.099
1GB3	A	1TDY	A	F2V;Y63W	2	130	130	1.8	1.7	0.438766	-0.278674	4.278	1.288	0.99	0.289
1GAZ	A	1GDX	A	I2V;R21A	2	130	130	1.8	1.8	0.88206	-0.874176	-0.03	2.09	0.971	1.823
1MLM	A	1MGN	A	H65Y;I69V	2	154	154	1.8	1.9	0.212028	-0.325517			0.573	5.286
1OUI	A	1JKC	A	A93V;W109F	2	130	130	1.8	1.6	0.698471	3.55957	-2.769	9.031	9.086	3.698
1TWM	A	1TWE	A	F101Y;Y146F	2	153	153	2.26	2.1	1.52279	-0.511005	6.492	1.538	0.416	2.778
1HEM	A	1UIF	A	H15V;T91S	2	129	129	1.8	1.85	5.60848	-0.811845	9.097	-5.457	8.15	7.343
1DTI	A	3NML	A	H65W;D98H	2	154	154	1.7	1.68	-0.905029	1.30969				7.444
1TAY	A	1EQE	A	A63Y;D120N	2	130	130	1.7	1.8	-0.308193	1.4882	-1.972	1.903	2.508	4.171
1QT3	A	3L64	A	D26T;S44E	2	164	164	1.85	1.9	-5.4539	2.8396	-3.405	7.144	-4.724	9.191
1SFD	A	2IDQ	A	F94P;M98A	2	105	105	0.99	0.9	3.81505	0.324669	6.531	-0.109	11.879	6.379
3CDR	A	1L58	A	Q96R;P143A	2	164	164	1.7	1.65	0.201273	-0.107582	-3.731	5.291	2.527
1TDY	A	1LHI	A	W63Y;P71G	2	130	130	1.7	1.8	1.54921	7.58318	-6.344	18.91	1.944	110.807
1GFA	A	1TDY	A	D2V;Y63W	2	130	130	1.8	1.7	-0.0873907	-0.16673	3.648	-3.101	-2.667	3.264
150L	A	1L24	A	I6M;A82P	2	164	164	2.2	1.7	-1.21473	4.47917	4.337	-2.297	0.691
1GF8	A	1GF4	A	S2V;V93T	2	130	130	1.8	1.8	2.28681	0.779906	-2.326	-0.777	1.009	1.049
1GF6	A	2MEI	A	I59Y;T99V	2	130	130	1.8	1.8	11.3361	4.83527	13.99	4.897	12.803	10.949
3P75	A	5J1Z	A	A78D;D92V	2	129	129	1.9	1.73					10.585
1GF3	A	1CJ7	A	T11V;S92A	2	130	130	1.8	1.8	-1.08972	1.57923	-3.213	4.599
1L53	A	1L16	A	C149V;G156D	2	164	164	1.85	1.7	7.47268	-1.89037	-0.069	3.979	7.658	-0.174
1KAB	A	1SYE	A	G111K;P112T	2	136	136	1.8	1.8	3.98134	-1.17418			9.1	0.544
1GF8	A	1LHH	A	S2V;V110P	2	130	130	1.8	1.8	-2.32254	2.43173	-2.244	2.174	-1.486
1L28	A	1L45	A	G86P;K135E	2	164	164	1.9	1.7	1.92931	1.74757	12.499	0.068	5.083	0.674
1GFG	A	1OUD	A	R2V;V121A	2	130	130	1.8	1.8	1.29176	-1.05867	0.934	-1.074	0.308	1.161
1IP6	A	2MEH	A	I59T;A127G	2	130	130	1.8	1.8	0.934552	-0.504982	5.76	-5.008	4.386	-0.213
2MEF	A	1CKD	A	T43V;M59I	2	130	130	1.8	1.8	3.06605	0.540544	2.05	5.195	1.19
3C8Q	A	4W51	A	D96R;L99A	2	164	164	1.64	1.45	3.93404	2.69784	0.929	-0.249	8.631
1D6P	A	1LAA	A	D53E;L63Y	2	130	130	2.23	1.77	0.638589	-0.821218	0.017	2.151		4.98
1EQ5	A	1YAP	A	I59V;N102D	2	130	130	1.8	1.8	1.29949	0.651674	2.229	1.149	4.664	-3.287
1GFE	A	1YAQ	A	N2V;I89V	2	130	130	1.8	1.8	3.04885	-0.864886	-1.019	1.026	0.455	4.549
1L66	A	1QSB	A	A43K;A98C	2	162	162	1.7	1.8	2.30155	0.772092	4.498	0.541	10.495	-0.85
1QTZ	A	1QT8	A	C20D;T26H	2	164	164	2	1.9	4.51053	2.59797	7.059	4.773	1.117	6.729
1JKA	A	1B7R	A	D35E;Q58G	2	130	130	1.66	1.8	-0.157186	4.20164	1.339	3.545	0.026	11.782
1L26	A	3FI5	A	C86P;R96W	2	164	164	1.7	1.53	8.02779	4.93848	42.889	-9.326	10.429	8.622
1IP5	A	1CKD	A	T43V;A105G	2	130	130	1.8	1.8	-2.43667	4.28016	-1.506	1.894	-0.875
1GF3	A	2MEC	A	I56M;S92A	2	130	130	1.8	2.2	-1.17138	0.978207	-3.508	3.842		3.671
2MEG	A	1B7N	A	E35L;S59I	2	130	130	1.8	1.8	-4.03309	7.3978	-8.528	14.866	0.251	12.585
1L14	A	3CDO	B	R96V;S157T	2	164	164	1.7	1.87	2.0439	0.562042	3.066	2.452	5.484	2.892
1L53	A	1L04	A	C149V;T157D	2	164	164	1.85	1.7	-2.3555	3.19212	0.325	5.496	2.975	1.183
1GFE	A	1GE1	A	N2V;Q58A	2	130	130	1.8	1.7	1.66611	0.572325	0.554	2.153	1.124	3.421
1GF4	A	1OUB	A	T93V;V100A	2	130	130	1.8	1.8	1.60369	3.40546	-1.735	4.049	1.755	7.385
1P2L	A	2Q9D	A	A41C;I87V	2	164	164	1.58	1.4	1.5438	-0.446316	-0.197	2.804	2.722
1L42	A	1L17	A	I3V;E16K	2	164	164	1.8	1.7	1.39865	-0.836223	-0.979	-1.464		0.428
1OUH	A	1B5X	A	A74V;S80A	2	130	130	1.8	2	0.894164	0.437609	0.937	3.968	0.491	0.975
150L	A	1L10	A	I6M;T157I	2	164	164	2.2	1.7	0.284981	3.27773	5.811	2.885	6.207	4.167
1BB3	A	1GF9	A	V2Y;L96A	2	130	130	1.8	1.8	4.73802	8.4615	13.089	-0.925	7.428	11.495
1L27	A	3CDV	A	D86P;R96M	2	164	164	1.8	1.73	1.45196	0.971923	15.83	-3.716		2.098
1QUD	A	1CV1	A	G99L;V111M	2	162	162	1.75	2.1	-4.73606	10.3543	-10.692	17.795	-6.891
1GB2	A	2MEA	A	M2V;I56F	2	130	130	1.8	2.2	5.51885	3.45806	19.685	-0.926	5.702	7.4
3C81	A	1L99	A	A85K;Q105G	2	164	164	1.85	1.95	0.454521	0.132662	3.468	1.232	4.977	-0.995
1QT4	A	1L39	A	Q26T;N144E	2	164	164	2.1	1.85	2.08347	2.96521	1.937	9.461	1.832	1.374
3C8Q	A	1L98	A	D96R;Q105E	2	164	164	1.64	1.8	0.180999	4.55163	-4.507	5.854	4.42	6.456
1MLF	A	2OHA	A	A69V;F139W	2	154	154	2	1.8	-0.897281	1.14908			0.258	5.642
1D6P	A	1OUC	A	L63Y;V110A	2	130	130	2.23	1.8	-0.0109268	0.602428	-0.313	-0.254		1.963
1L60	A	1L45	A	A113G;K135E	2	164	164	1.7	1.7	1.53743	-1.66792	0.984	0.356	2.872	-2.715
1L99	A	1L58	A	G105Q;P143A	2	164	164	1.95	1.65	0.930811	-0.350666	-4.318	6.26	-0.215
1B7P	A	1B5X	A	G78H;S80A	2	130	130	2	2	1.93549	-1.03042	-1.908	2.816		-0.127
1L28	A	3CDQ	A	G86P;R96S	2	164	164	1.9	1.68	2.47619	8.02334	16.663	-1.723	9.381	2.734
3F8V	A	1L07	A	H96R;T157F	2	164	164	1.08	1.7	0.471876	7.88301	5.779	14.254	3.693	10.433
3CDO	B	1L31	A	P86R;V96R	2	164	164	1.87	1.8	2.39518	5.11467	-2.067	29.065	3.849	10.387
1C90	A	1C8X	A	D125E;Q127E	2	265	265	2.1	2	0.358764	2.2825
1GFU	A	2MEH	A	I59T;D110V	2	130	130	1.8	1.8	4.57787	-3.68091	3.824	-4.586	7.729	-3.397
1EQ5	A	1LHK	A	D91P;N102D	2	130	130	1.8	1.8	-0.295285	1.46348	6.968	-4.011	5.72	0.34
1QUD	A	244L	A	G99L;I100A	2	162	162	1.75	1.7	-2.42879	4.3765	-3.466	8.864	-4.204	10.385
1B7R	A	1GE3	A	G58Q;N118G	2	130	130	1.8	1.8	3.41691	1.90832	8.483	4.893	4.885	4.417
1GBY	A	1D6Q	A	D102E;M110V	2	130	130	1.8	1.96	0.678967	-0.123453	0.586	0.019	-0.603
1WQN	A	1OUB	A	F20Y;V100A	2	130	130	1.8	1.8	1.97454	2.45621	2.346	5.529	1.997	6.498
1B5X	A	1OUD	A	A80S;V121A	2	130	130	2	1.8	1.36907	-0.0560896	5.577	-2.7	0.939	1.15
2MED	A	1B7P	A	F59I;H78G	2	130	130	1.8	2	3.38536	9.5063	4.903	8.25	10.716
3KUE	A	3ILL	A	A77E;D97A	2	158	158	1.54	1.73	-0.276106	0.395305	-1.576	3.613	6.239	4.138
1GB9	A	1GBO	A	F74V;V110G	2	130	130	1.8	1.8	1.00201	0.267206	1.112	1.72		-0.443
1GB9	A	1I1Z	A	F74V;Q86D	2	130	130	1.8	1.8	1.68966	1.47708	1.573	4.075		-2.615
1E67	A	3IN0	A	F114P;M121Q	2	128	128	2.14	2.35	9.71297	7.70324	17.507	6.614	18.239	11.023
1GFU	A	1YAO	A	I56V;D110V	2	130	130	1.8	1.8	2.63582	-3.07693	0.219	-0.733	4.668	0.856
1WQN	A	1GB5	A	F20Y;V74G	2	130	130	1.8	1.8	0.900284	0.196393	0.819	3.962	0.992
1UID	A	1H6M	A	F15H;E35Q	2	129	129	1.95	1.64	1.6231	0.0693022	1.438	5.336	1.52	1.546
1B7Q	A	1IP5	A	L27N;G105A	2	130	130	2	1.8	5.59422	-2.95454	1.943	-0.414		-2.45
1GFR	A	1CJ9	A	T40V;R74V	2	130	130	1.8	1.8	-0.798839	1.15742	0.796	3.938	4.341
2HED	A	1B5X	A	A59I;S80A	2	130	130	1.8	2	0.362497	3.06162	-3.618	7.423	6.034	6.611
1L45	A	1L12	A	E135K;T157N	2	164	164	1.7	1.7	0.162037	1.7851	6.001	1.609	1.397	2.13
5JES	B	3DVB	A	N60V;T119V	2	258	258	1.21	1.7	-0.324471	2.2627				1.867
1MNH	A	1MNJ	A	R67T;V68I	2	153	153	2.3	2.2	-0.507014	0.608832	-3.02	3.212	-2.589	3.43
164L	A	1QSB	A	A98C;A119R	2	162	162	1.8	1.8	3.10815	-0.143429	1.952	2.076	11.464	-0.188
1OUB	A	1CJ9	A	T40V;A100V	2	130	130	1.8	1.8	0.782686	3.54453	2.03	5.253	8.783
1GF6	A	133L	A	T99V;R115H	2	130	130	1.8	1.77	-2.02681	2.38442	-1.371	2.398	-3.973	7.001
1MLM	A	1CO9	A	I69V;L105V	2	154	154	1.8	1.6	2.64959	-2.13783			3.467
1TOO	A	1TWE	A	F101Y;W146F	2	153	153	2.1	2.1	2.5952	2.10647	-3.09	7.683	6.23	2.993
1GE2	A	1GF0	A	A32S;A78H	2	130	130	2	1.8	1.06149	-0.77698	5.972	-2.007		-0.069
1L60	A	1L08	A	A113G;T157G	2	164	164	1.7	1.7	2.24769	-0.123904	7.691	-3.407	2.807	-2.579
1GF4	A	1YAM	A	T93V;I106V	2	130	130	1.8	1.8	1.58822	0.378388	-3.121	0.248	2.163	1.147
1FN5	A	3A3Q	A	A49G;N59D	2	129	129	1.78	2	2.07595	-0.365904	2.485	-2.529	3.082	3.227
1B5X	A	1B7L	A	A32L;A80S	2	130	130	2	1.8	4.65238	4.1668	10.598	3.343	11.626	6.546
1QT4	A	247L	A	Q26T;L84A	2	164	164	2.1	1.75	7.82303	-2.37941	10.962	0.175	7.539	-2.208
1GB5	A	1JKC	A	G74V;W109F	2	130	130	1.8	1.6	1.77683	1.92021	-0.867	8.741		5.486
1GBZ	A	2MEG	A	I59S;F110V	2	130	130	1.8	1.8	4.74301	-2.05626	4.414	-1.097		-1.062
1G0P	A	1P36	A	I100V;G149V	2	164	164	1.8	1.45	-3.05297	3.02714	-7.779	5.648	-2.287	7.303
1L45	A	1L04	A	E135K;T157D	2	164	164	1.7	1.7	0.182342	2.34537	5.525	-1.025	5.306	-1.816
1TDY	A	1GBZ	A	W63Y;V110F	2	130	130	1.7	1.8	-0.890881	1.51885	-2.753	5.425	1.395
3FI5	A	1L17	A	I3V;W96R	2	164	164	1.53	1.7	2.67647	8.48042	-7.388	28.891	6.388	5.028
1GAO	A	1FRI	A	D23N;S44L	2	106	106	2.2	2.1	-2.99707	1.79021	-2.861	4.416		6.932
2EB8	A	1MOC	A	H65T;D123N	2	154	154	1.65	2	0.51964	0.314653			7.358	1.42
4ZUJ	A	3P75	A	H79Y;V92D	2	129	129	1.72	1.9						5.975
1R86	A	4PUD	A	A151Q;A257E	2	371	371	1.8	2.01	4.07413	1.73174			8.545	3.043
1B5V	A	1GFK	A	A51S;V74N	2	130	130	2.17	1.8	0.624216	0.301492	3.425	2.48	-0.934	2.511
1GBX	A	1GF3	A	A92S;L110V	2	130	130	1.8	1.8	1.24439	-0.942497	3.341	-4.715	2.876
2HED	A	2MEB	A	I56L;A59I	2	130	130	1.8	1.8	-0.410967	3.96744	-0.251	8.883	3.391	12.177
1TLA	A	1QSB	A	A98C;F117S	2	162	162	2	1.8	8.91121	7.36558	-5.29	1.475	20.717	5.365
1L06	A	1L31	A	P86R;E157T	2	164	164	1.7	1.8	1.03023	5.03158	-6.605	28.833	0.454	9.398
1L30	A	1L98	A	L86P;Q105E	2	164	164	1.7	1.8	1.26427	1.50116	21.22	-2.612	12.608	-0.354
1B5X	A	1EQ5	A	A80S;D102N	2	130	130	2	1.8	-0.0683058	0.70467	2.226	-0.692	-1.529	3.294
134L	A	1GEV	A	L8T;E115R	2	130	130	1.77	2.1	4.46861	0.776416	9.081	-1.608	9.517	-2.136
150L	A	1L20	A	I6M;N144D	2	164	164	2.2	1.85	-1.58102	4.62479	0.793	0.67	1.684	1.909
1GFE	A	1GF0	A	N2V;A32S	2	130	130	1.8	1.8	2.65043	-0.423833	0.985	1.506	2.793	0.721
1GF6	A	1GFT	A	T99V;V110Y	2	130	130	1.8	1.8	-2.43539	3.4593	0.931	0.219	-0.075	4.236
1CKC	A	1CJ9	A	T40V;A43T	2	130	130	1.8	1.8	-0.14159	1.52885	3.254	1.338	7.617
1CJ7	A	1GF9	A	V2Y;V11T	2	130	130	1.8	1.8	1.08701	-0.938542	4.055	-1.077		1.008
1I1Z	A	1GF0	A	A32S;D86Q	2	130	130	1.8	1.8	3.0915	-0.805666	5.39	0.208	1.221	2.717
1B7Q	A	1GF0	A	L27N;A32S	2	130	130	2	1.8	2.81648	-1.25514	4.967	-0.814		-3.584
5CKG	A	3QDA	A	E86V;W96L	2	100	100	1.75	1.57	1.27533	0.67449
1GE4	A	2MEF	A	I59M;A118N	2	130	130	1.8	1.8	-0.953108	3.58504	0.733	4.181	1.858	3.541
1GB5	A	1LYY	A	D67H;G74V	2	130	130	1.8	1.8	4.88109	0.20801	7.833	2.855		-1.64
1L37	A	1L04	A	E115T;T157D	2	164	164	1.85	1.7	0.720888	0.270994	4.163	0.235	5.549	-2.64
1GE2	A	1B7M	A	A78H;A96M	2	130	130	2	2.2	7.61309	3.19105	2.011	3.45		4.311
1B5W	A	1EQ4	A	E7Q;A61S	2	130	130	2.17	1.8	-0.15923	0.783133	2.794	-0.996	3.435
1B7S	A	207L	A	S74V;C77A	2	130	130	2	1.8	4.86953	0.689907	-3.127	2.064		2.626
1YAQ	A	1GEV	A	L8T;V89I	2	130	130	1.8	2.1	5.37631	0.608497	8.422	0.192	8.604	-4.366
2MED	A	1EQ4	A	E7Q;F59I	2	130	130	1.8	1.8	4.24827	9.51431	6.935	8.05	11.517
1CKF	A	1B7R	A	A52T;Q58G	2	130	130	1.8	1.8	1.61519	5.08253	6.737	6.797		4.97
1B7Q	A	2MED	A	L27N;I59F	2	130	130	2	1.8	9.30053	3.15541	9.531	4.615		9.853
1INU	A	1LHL	A	A47P;R110V	2	130	130	1.8	1.8	-0.975724	1.59524	0.447	-0.291	-3.55	2.482
1B5V	A	1TCY	A	A51S;Y63F	2	130	130	2.17	1.7	-0.229572	0.9537	2.967	0.106	-1.924	3.298
1JKB	A	2MEI	A	A35E;I59Y	2	130	130	1.66	1.8	11.8987	2.50416	22.289	3.595	20.797	8.159
1OUG	A	1LOZ	A	A2V;I56T	2	130	130	1.8	1.8	4.40477	-1.78902	5.214	-0.625	5.124	1.959
1DI3	A	1B7O	A	G37Q;G50R	2	130	130	1.8	1.8	4.53116	-1.17561	1.028	0.424		-2.558
1WQN	A	2MEG	A	F20Y;I59S	2	130	130	1.8	1.8	4.59699	-0.70249	7.413	-0.221	7.712	1.942
1CJ8	A	1WQM	A	A40T;Y124F	2	130	130	1.8	1.8	0.678166	-0.909427	3.518	-1.998		0.236
1L59	A	1QUG	A	E108V;N109T	2	162	162	1.75	1.9	0.245081	0.105257	-3.405	3.77	-0.14	1.599
1A8E	A	3FGS	A	G63R;K204E	2	329	329	1.6	1.8	8.77451	1.79068
1CV6	A	1QSB	A	A98C;M149V	2	162	162	1.9	1.8	2.33817	0.309724	0.917	3.736		6.66
1IX0	A	2BQI	A	A59I;V121A	2	130	130	1.8	1.8	-0.207906	2.1066	-0.021	4.277	0.78	6.329
2A4T	A	1QT6	A	E11H;C131V	2	164	164	1.7	1.9	0.186364	1.16072	0.157	5.86	-1.852	6.748
2MEA	A	1GFR	A	F56I;V74R	2	130	130	2.2	1.8	3.87448	3.96738	-0.514	19.448	6.921	7.538
1B5Y	A	2MEF	A	A36S;I59M	2	130	130	2.2	1.8	-0.357446	3.90036	3.162	1.125	4.632	2.886
1L32	A	1L56	A	K60P;S86P	2	164	164	1.7	1.8	2.70759	4.12423	18.124	-3.914	2.583	2.409
1GB6	A	1GE2	A	I74V;H78A	2	130	130	1.8	2	0.40501	0.162061	0.533	0.467	3.012
1B5X	A	1OUC	A	A80S;V110A	2	130	130	2	1.8	-0.167901	1.13997	2.566	-0.943	-0.061	2.231
1CH2	A	2MGC	A	H65L;F90L	2	154	154	1.8	1.9	-1.50518	2.00657				3.678
1TAY	A	1WQM	A	A63Y;Y124F	2	130	130	1.7	1.8	-0.263239	2.02089	3.066	-1.877	2.594	3.649
1L42	A	3CDR	A	E16K;R96Q	2	164	164	1.8	1.7	1.50839	-1.12122	2.663	-2.194		1.868
3CDT	A	1L04	A	N96R;T157D	2	164	164	1.63	1.7	1.04073	2.70105	2.878	2.121	4.749	1.025
3H57	A	2MGJ	A	L65V;N69V	2	154	154	1.7	2	1.39661	0.383669			3.032	3.4
1TDY	A	1OUC	A	W63Y;V110A	2	130	130	1.7	1.8	-0.290964	0.4077	-5.893	6.336	-0.002	0.77
1L42	A	1L98	A	E16K;Q105E	2	164	164	1.8	1.8	-0.291675	0.746322	1.952	-0.429		-0.855
242L	A	247L	A	A50I;L84A	2	164	164	1.8	1.75	2.31906	-2.12938	13.134	-2.307	6.336	-0.255
1HCH	A	1KZM	A	R38S;H42E	2	306	306	1.57	2	2.66801	-1.48002	5.275	-3.207	10.73	-2.919
3C83	A	1L47	A	A89D;R154E	2	164	164	1.84	1.7	1.29984	-0.920973	-0.31	-0.652	4.134	-4.212
1D6Q	A	1GEZ	A	A9S;E102D	2	130	130	1.96	1.8	1.67245	-1.35695	-0.699	-2.822		-3.58
163L	A	1QS9	A	A98V;A123Q	2	162	162	1.8	1.85	4.91831	1.20451	12.343	-0.782	12.258	2.437
1GAZ	A	1GEV	A	I2V;L8T	2	130	130	1.8	2.1	4.90874	-1.50432	9.715	-1.801	9.59	-4.301
1UGC	A	3DVB	A	N60V;H63A	2	258	258	2	1.7	2.51711	2.57234			8.834	0.208
1L27	A	1L11	A	D86P;T157L	2	164	164	1.8	1.7	2.73649	2.36193	17.208	-3.188		0.698
4RMT	A	5CSB	A	D77N;N99D	2	100	100	1.24	1.72	2.23277	-0.316013
1UCJ	A	1T2H	A	T36V;Y81W	2	96	96	1.81	1	0.366448	2.15598	3.767	-1.113	0.88	2.696
1GF4	A	133L	A	T93V;R115H	2	130	130	1.8	1.77	-0.987197	2.64788	-6.692	4.302	-1.868	5.411
2IGC	A	5G27	A	C115T;L118C	2	164	164	1.4	1.61	3.19098	-2.98422	6.685	-4.263	6.195
1LHJ	A	1YAP	A	I59V;G103P	2	130	130	1.8	1.8	0.834265	1.40786	5.732	-0.89	12.676	-0.003
253L	A	2A4T	A	A20D;V131C	2	164	164	2	1.7	-0.881212	1.6502	-0.472	2.275	4.542	1.357
3ESZ	A	1RCF	A	A2K;A3K	2	169	169	1.94	1.4	-0.0508444	1.29701	5.489	-0.721		0.474
1GE4	A	1CKH	A	T70V;A118N	2	130	130	1.8	2	0.977734	1.85586	2.224	4.307	-0.915
1GF8	A	1WQM	A	S2V;Y124F	2	130	130	1.8	1.8	-0.228817	0.717629	-0.654	0.991	-0.122	2.323
1GB2	A	2HEE	A	M2V;I59G	2	130	130	1.8	1.8	3.70598	-1.87116	9.295	-3.756	8.921	3.923
2OHA	A	2SPO	A	L30V;W139F	2	154	154	1.8	1.7	1.49799	-0.82062			13.49	1.021
1GBX	A	1GE3	A	L110V;N118G	2	130	130	1.8	1.8	0.0594038	1.38598	0.412	-0.656	-0.253	1.41
1L19	A	1L09	A	D38S;T157H	2	164	164	1.7	1.7	4.20971	-3.73349	9.309	-2.468	4.135	3.106
1OUE	A	2MEH	A	I59T;A125V	2	130	130	1.8	1.8	2.21124	-0.606462	4.393	-2.032	6.064	-1.639
4KMW	A	4JAC	A	N34Y;T56S	2	137	137	1.79	1.93	1.43414	0.600593	0.124	1.248	5.301	2.458
1QUD	A	1LLH	A	G99L;T157I	2	162	162	1.75	1.8	-2.43494	4.24785	-7.538	11.08	-3.906	11.629
1IP4	A	1GB9	A	A72G;V74F	2	130	130	1.8	1.8	0.111986	1.94667	4.979	-1.377	-1.192
102M	A	1MLU	A	A65G;V69A	2	154	154	1.84	1.9	2.07452	-1.31656			3.895	2.393
2MED	A	1GF3	A	F59I;A92S	2	130	130	1.8	1.8	4.0594	11.3733	8.026	6.545	13.124
1LHI	A	1GEV	A	L8T;G71P	2	130	130	1.8	2.1	14.2941	1.54198	20.815	-1.613	116.939	-1.257
1GB7	A	2HEF	A	L74V;I89A	2	130	130	1.8	1.8	3.66554	-2.66497	7.617	-1.526	6.295	4.155
1GE0	A	1IP4	A	G38Y;G72A	2	130	130	1.8	1.8	1.70082	2.10016	-4.399	8.078	-2.035	5.807
1S54	A	1TN5	A	A20T;K37P	2	227	227	2.2	2.2	5.54075	-1.57407			12.591	1.277
1I20	A	1LOZ	A	I56T;D92A	2	130	130	1.9	1.8	2.56344	0.515009	1.86	0.532	3.068	4.027
1GAZ	A	1B7P	A	I2V;H78G	2	130	130	1.8	2	0.213379	1.50195	0.863	0.958	1.065
1SWY	A	3FI5	A	A72D;E96W	2	164	164	1.06	1.53	8.38275	1.70165	32.509	-4.022	1.85	5.727
1L09	A	3CDO	B	R96V;H157T	2	164	164	1.7	1.87	2.71165	2.75117	3.165	3.349	6.814	3.222
1JKA	A	1B7P	A	D35E;H78G	2	130	130	1.66	2	0.0414204	2.72095	1.026	1.32	-1.617
[truncated: 5,935 more rows]
