# Supplementary figures and images for: Self-consistency test reveals systematic bias in programs for prediction change of stability upon mutation
Source: Oxford University Press journal article supplement (doi:10.1093/bioinformatics/bty340), 2018-04-30

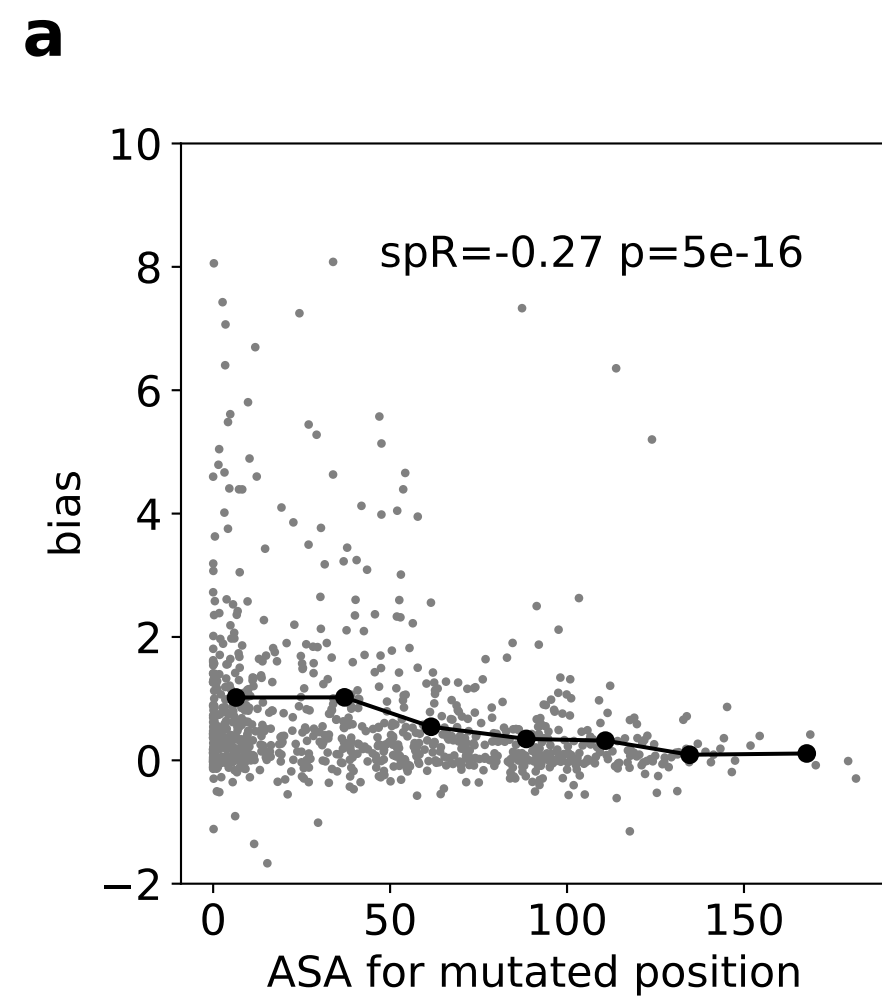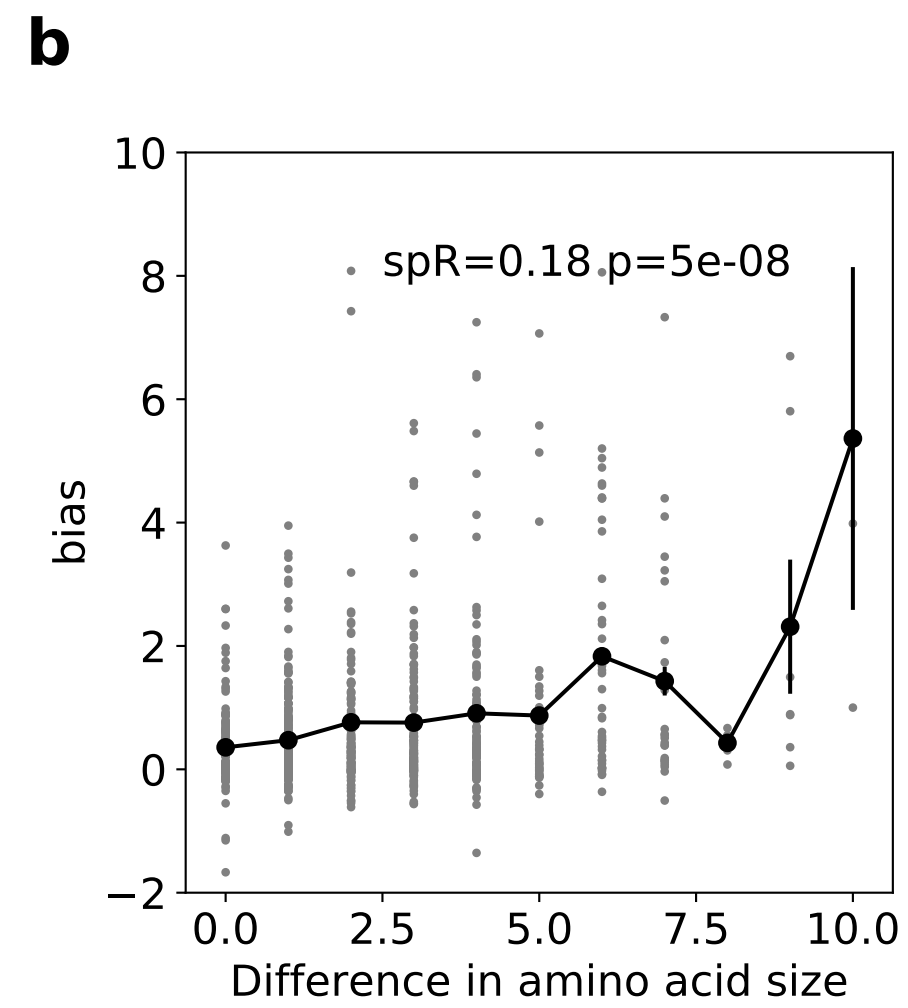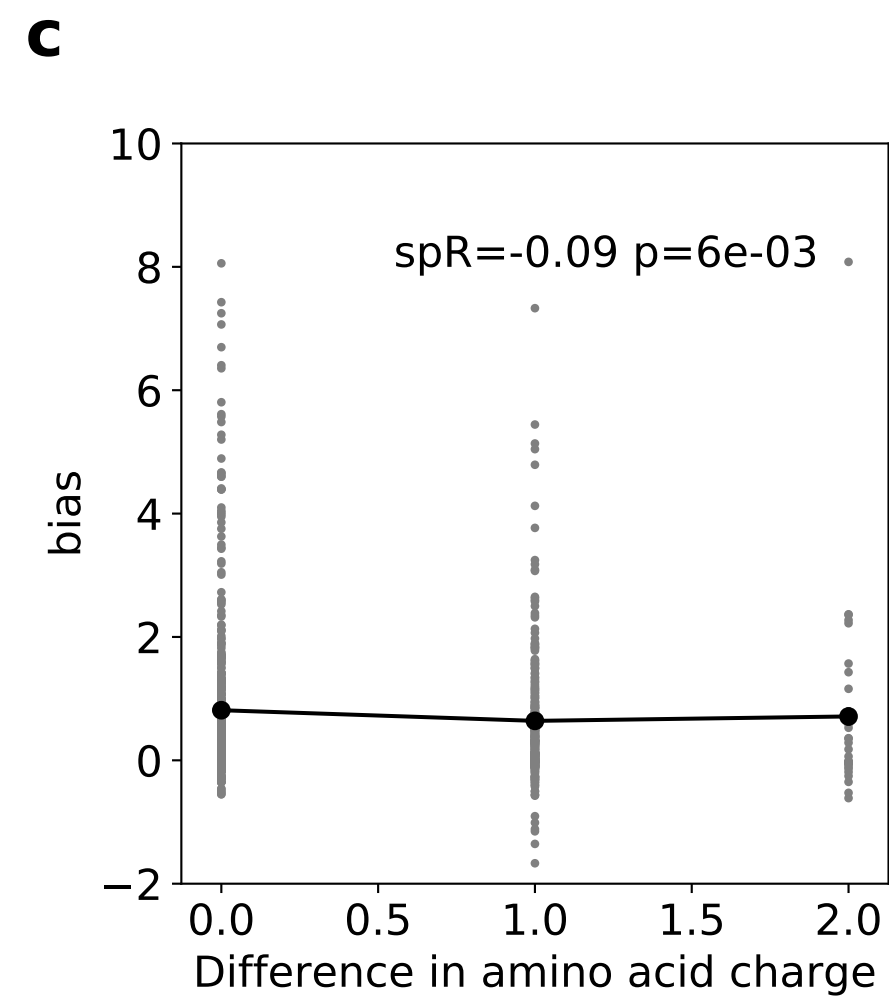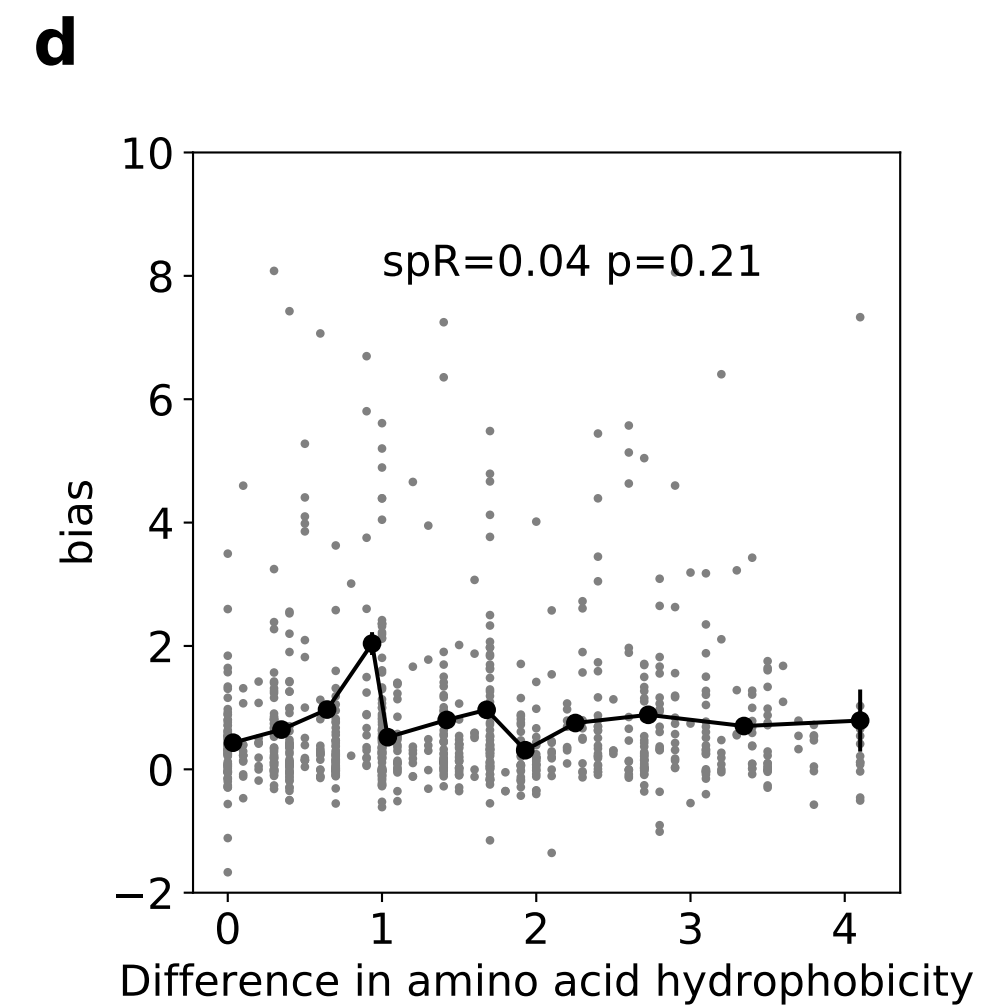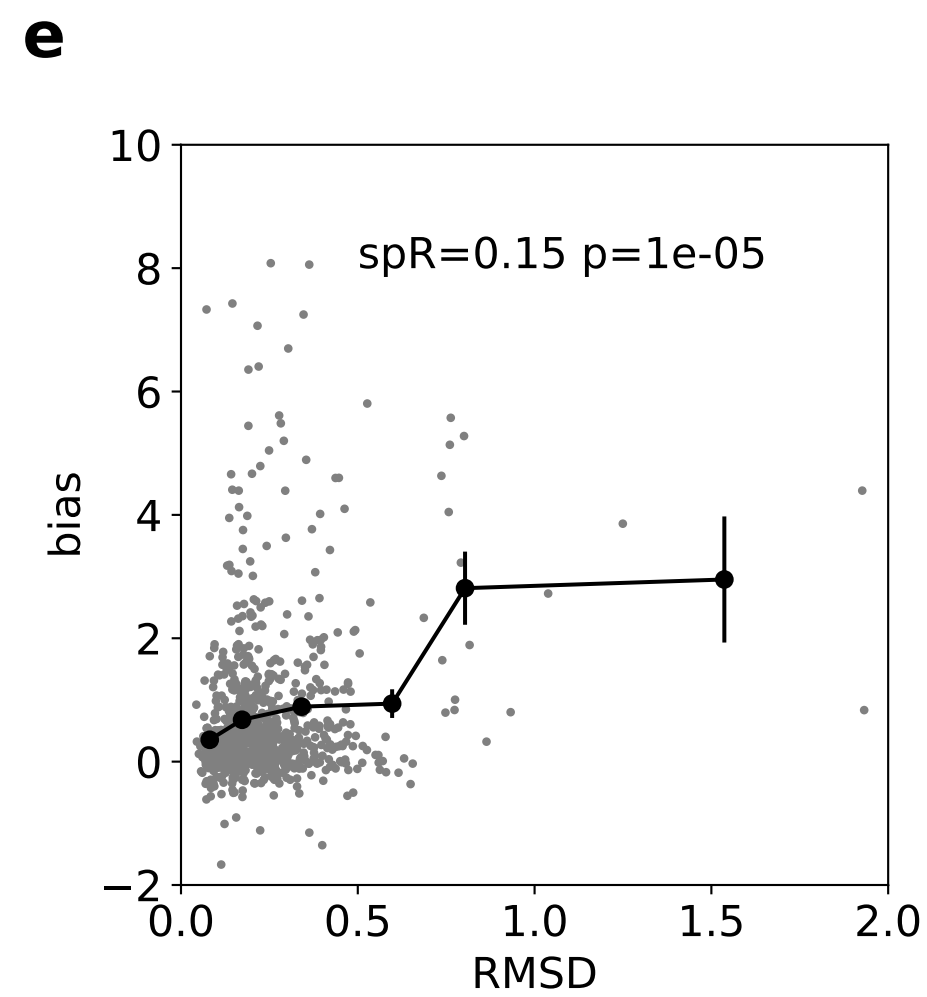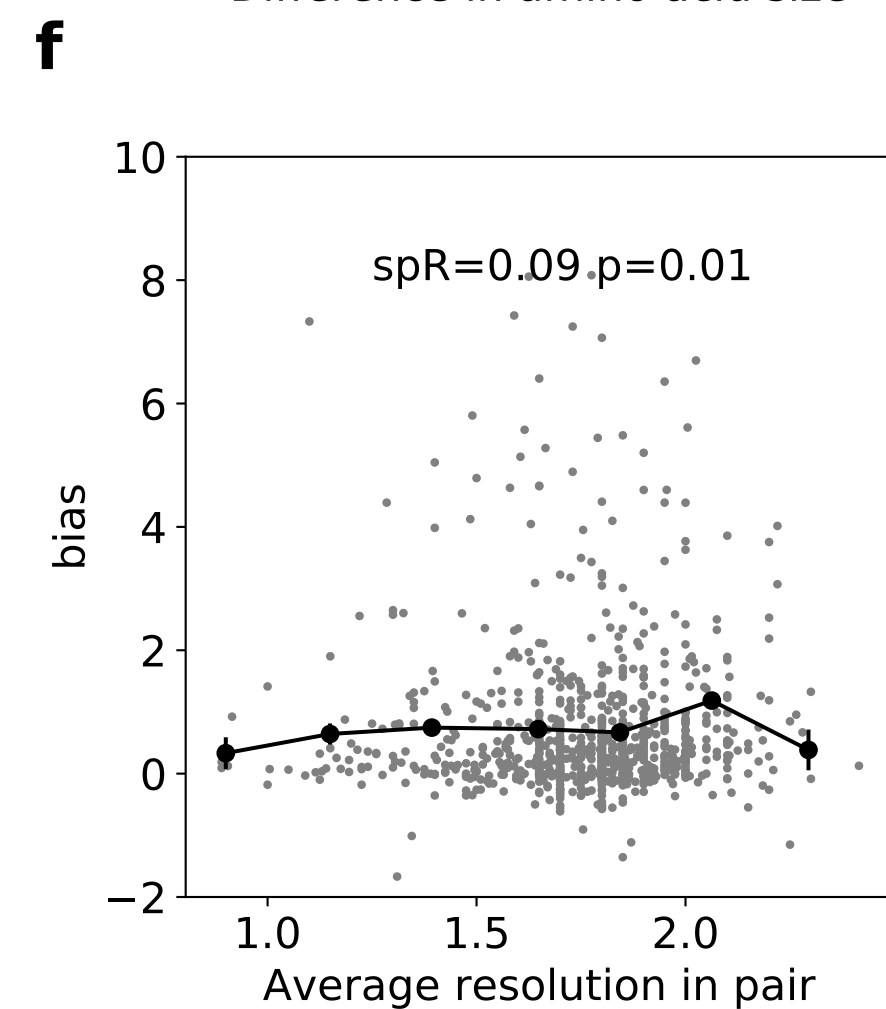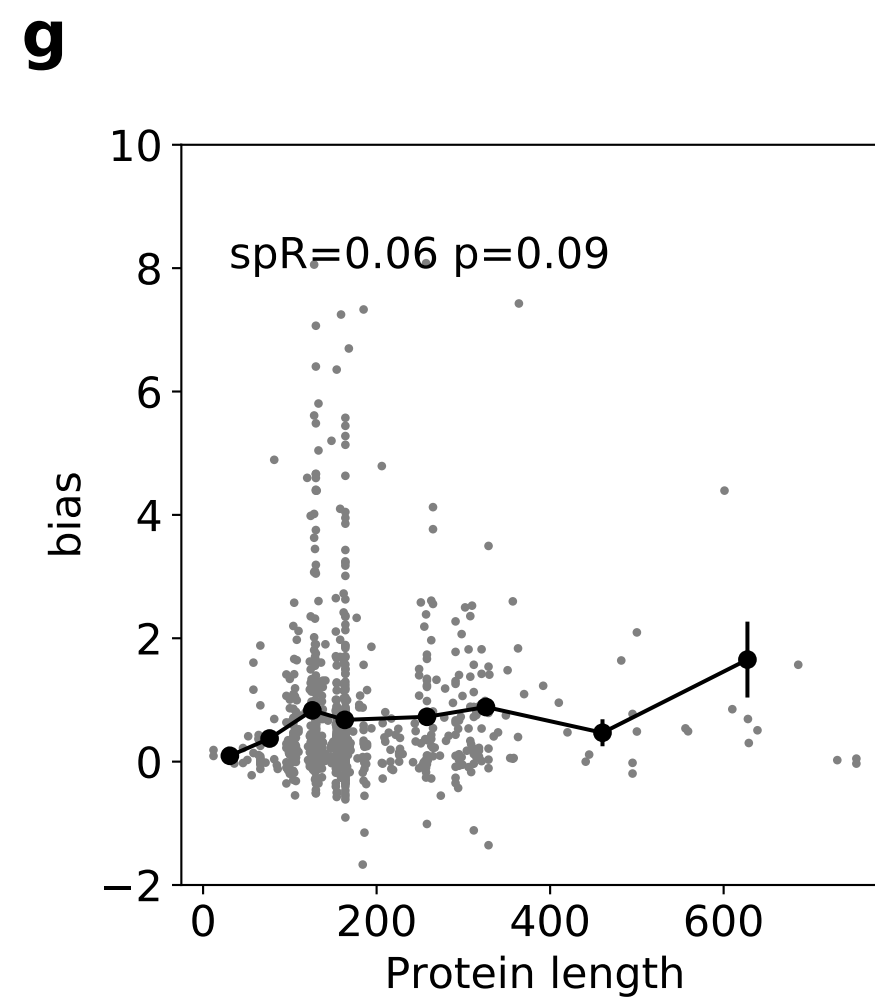

Supplement: bioinformatics_34_21_3653_s1.pdf [file bioinformatics_34_21_3653_s1.pdf]

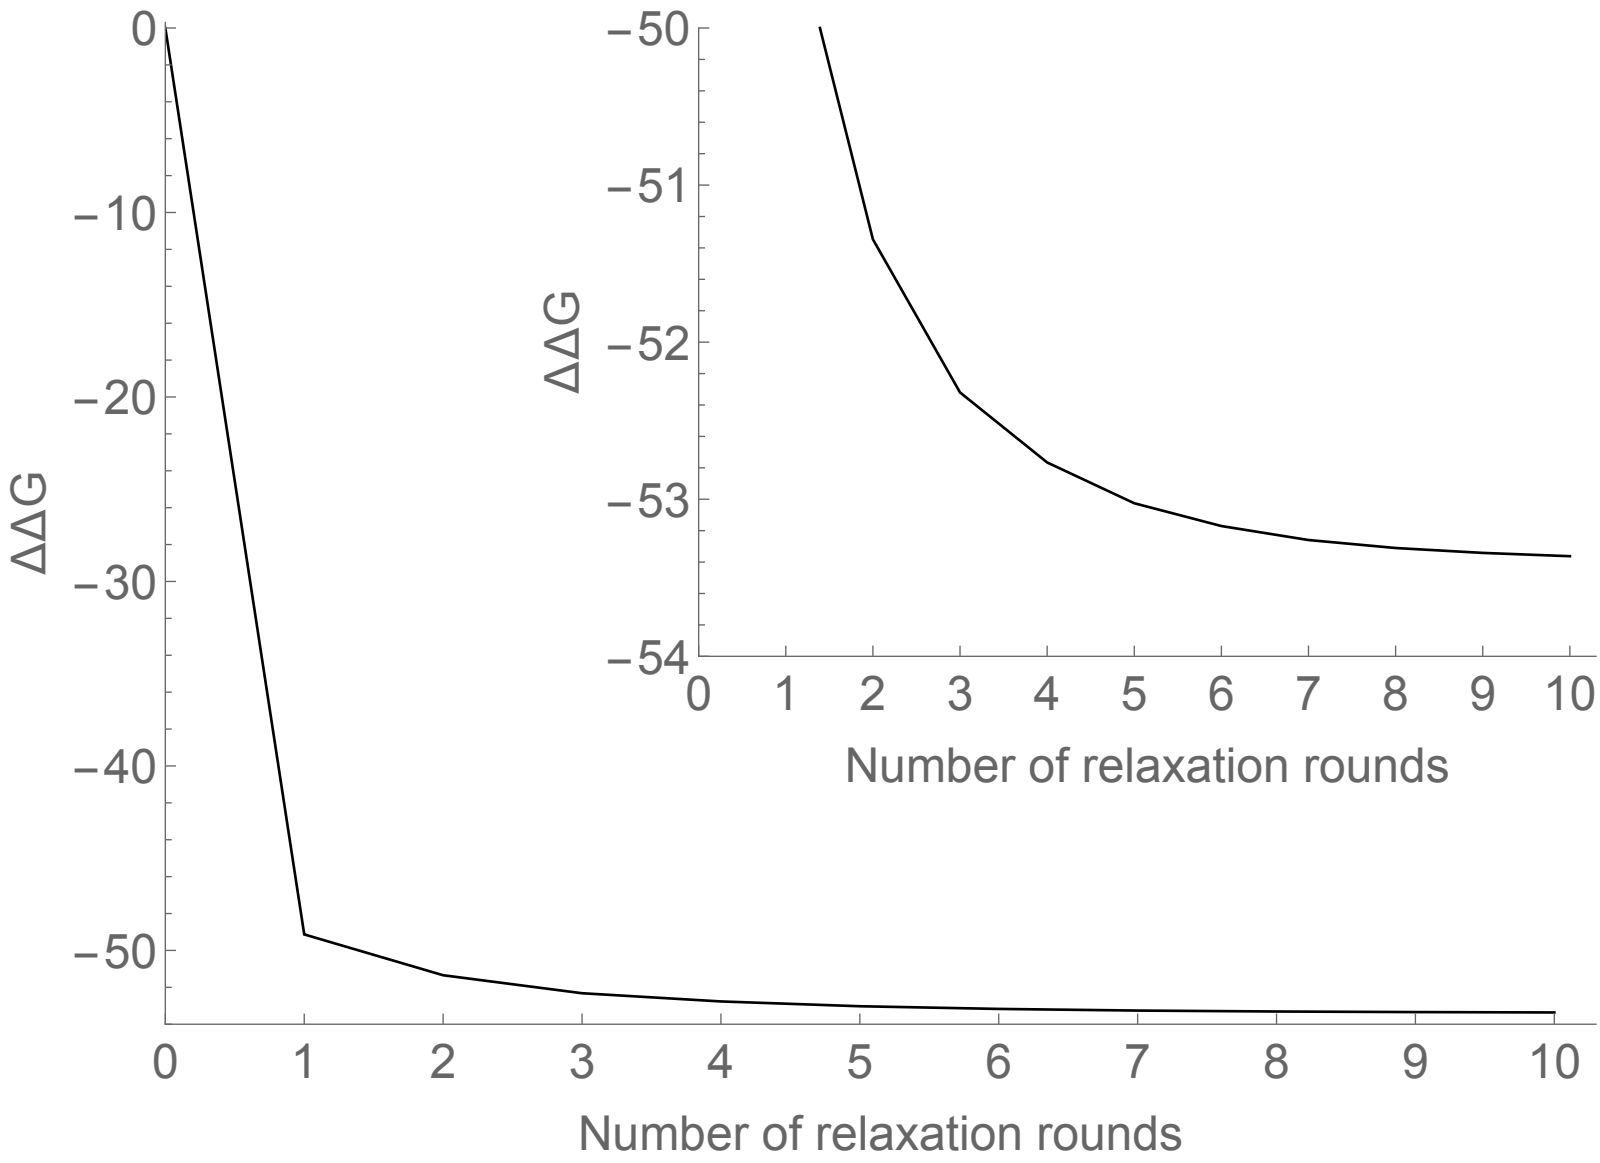

Supplement: bioinformatics_34_21_3653_s2.pdf [file bioinformatics_34_21_3653_s2.pdf]

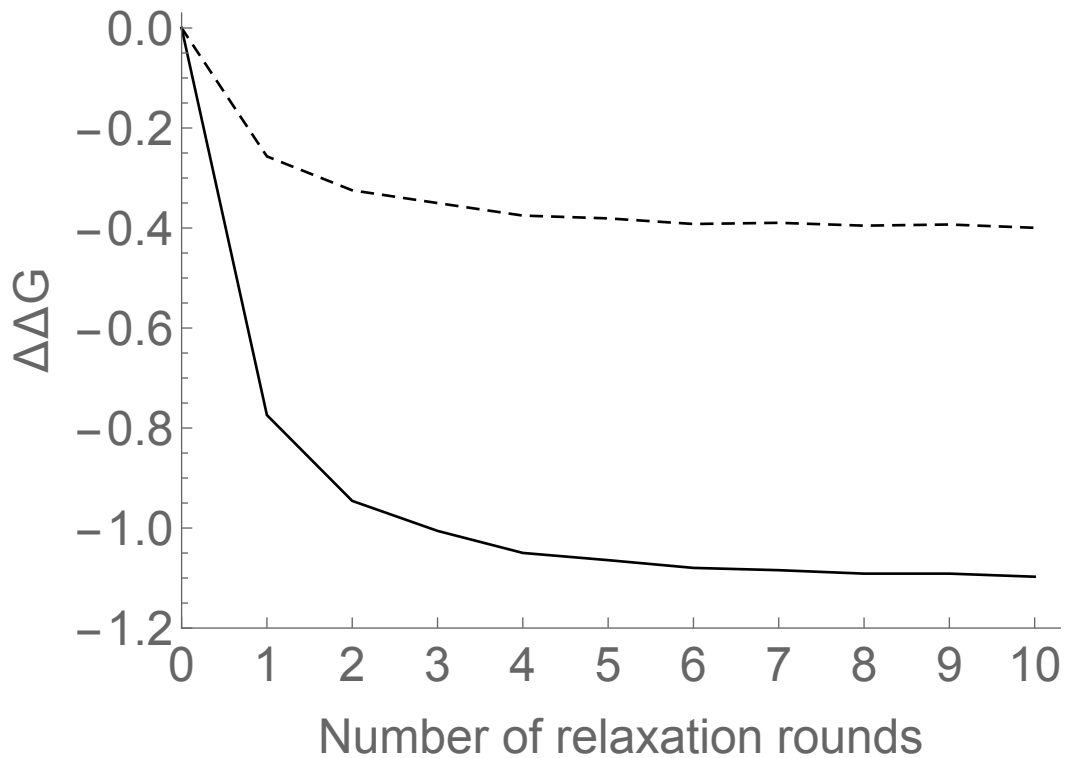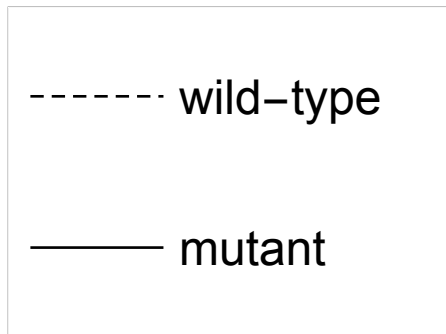

Supplement: bioinformatics_34_21_3653_s4.pdf [file bioinformatics_34_21_3653_s4.pdf]

Number of mutations

BuildModel

BuildModel & RepairPDB

BuildModel & Modeller & RepairPDB

1

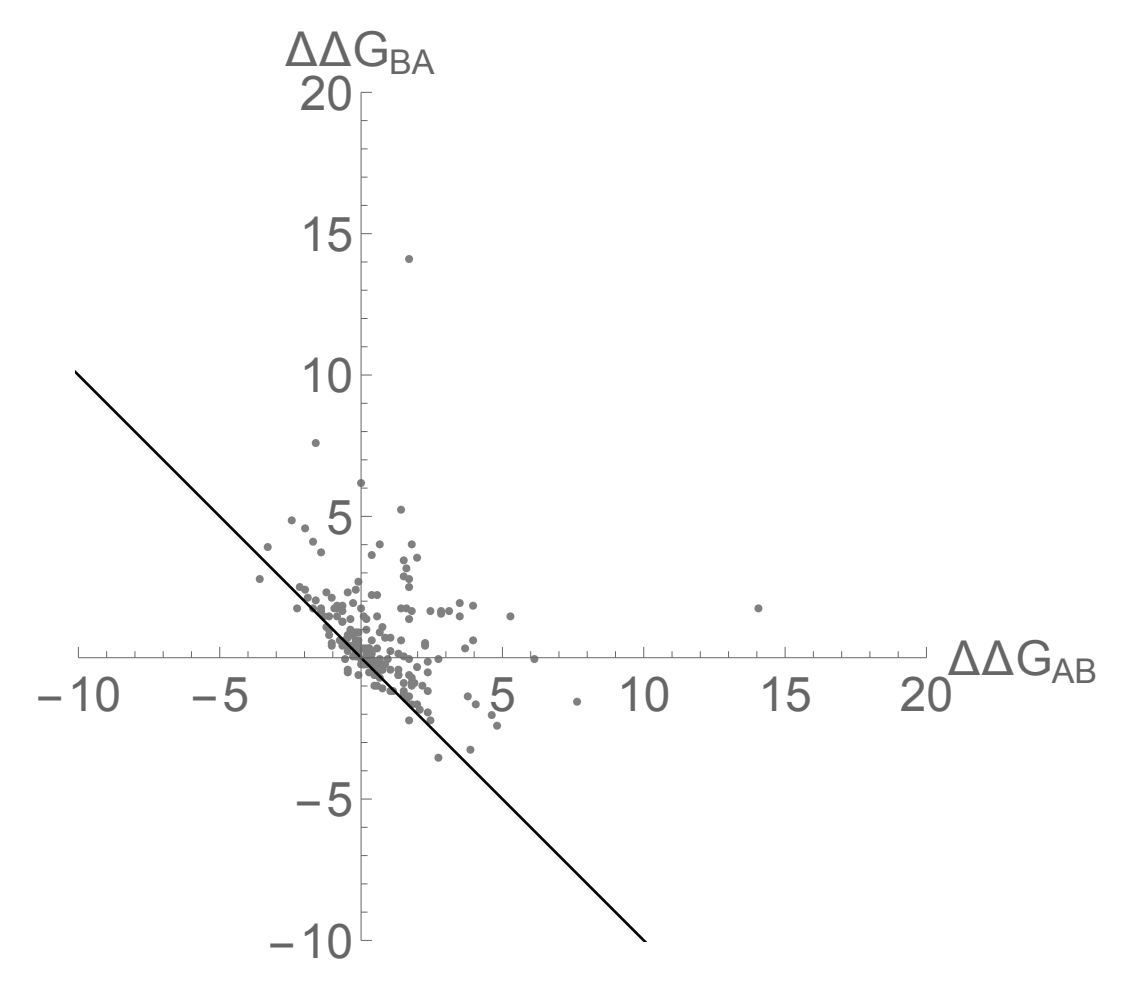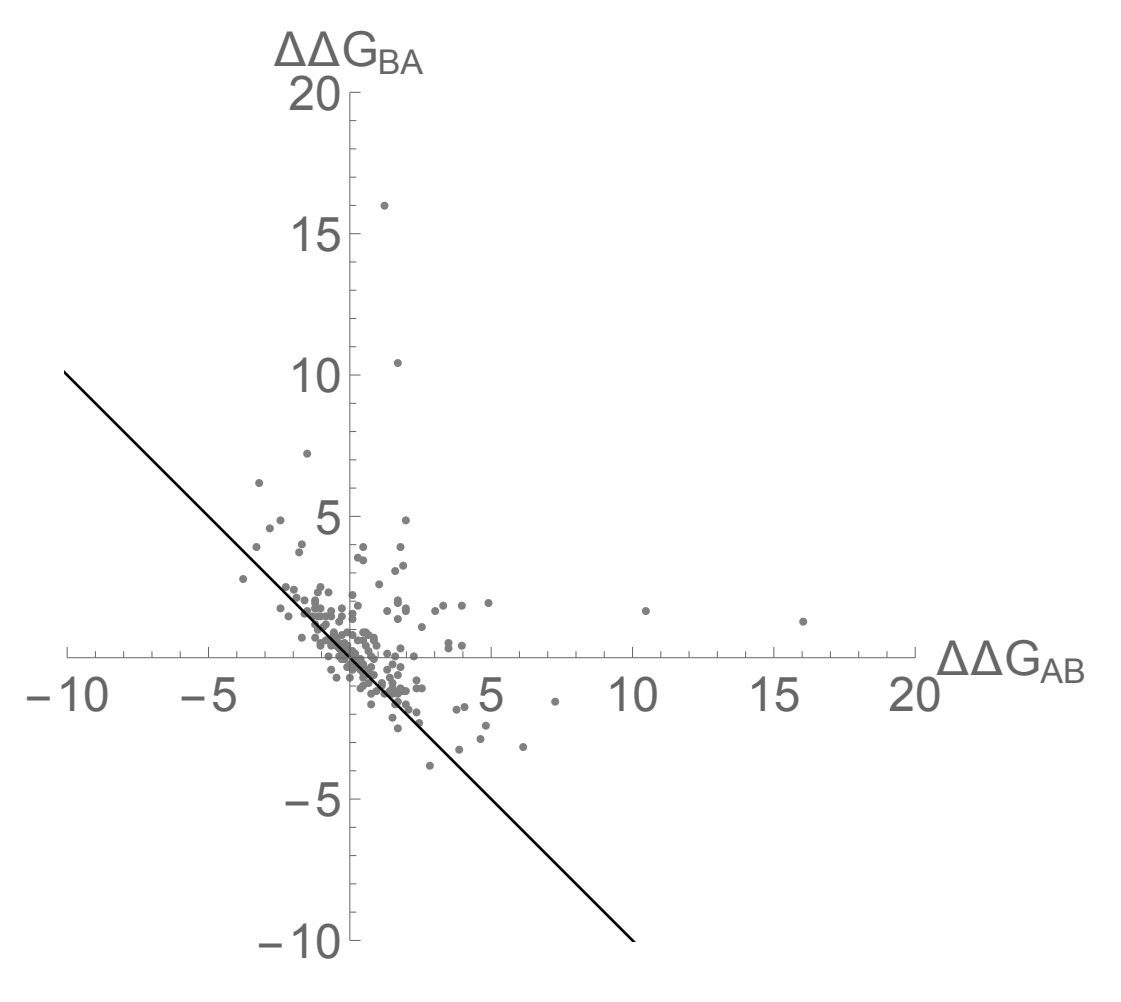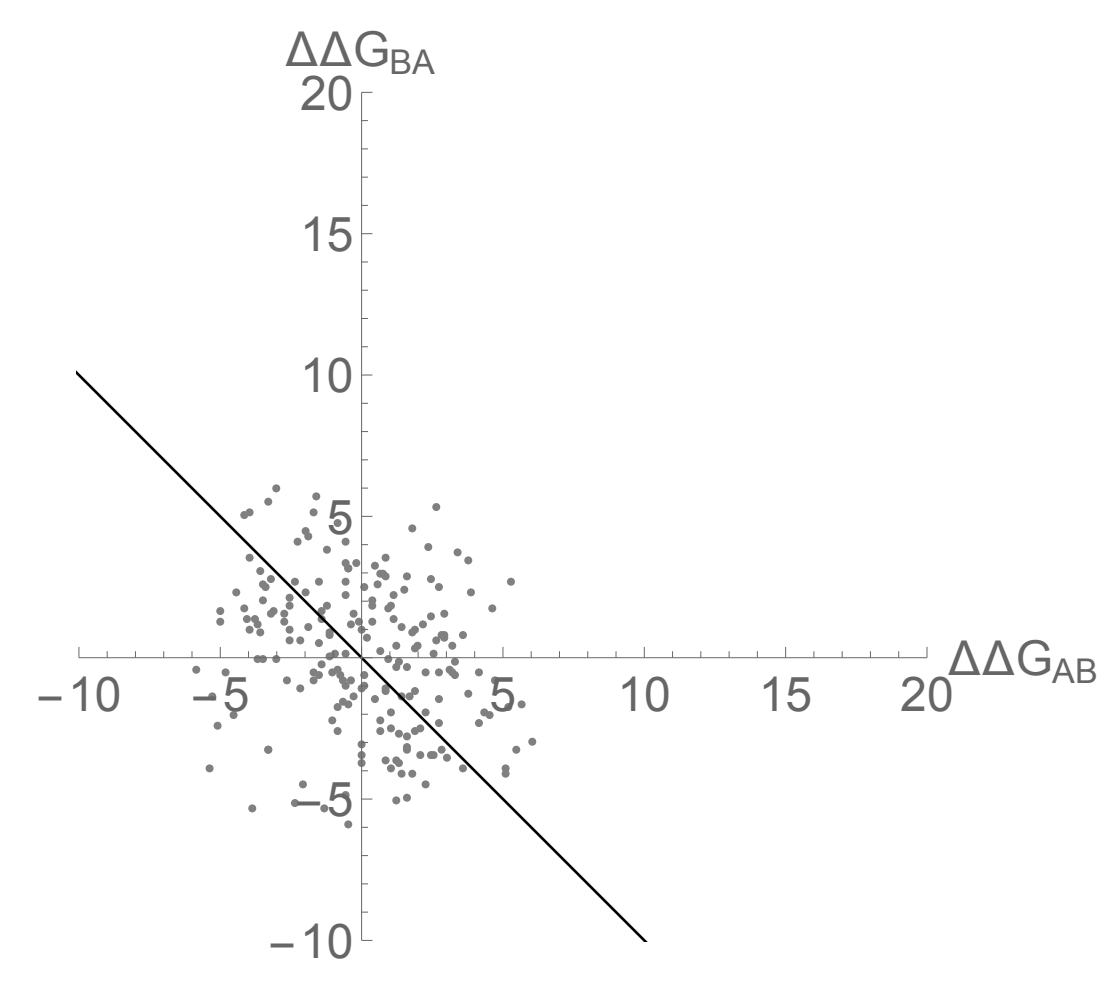

2

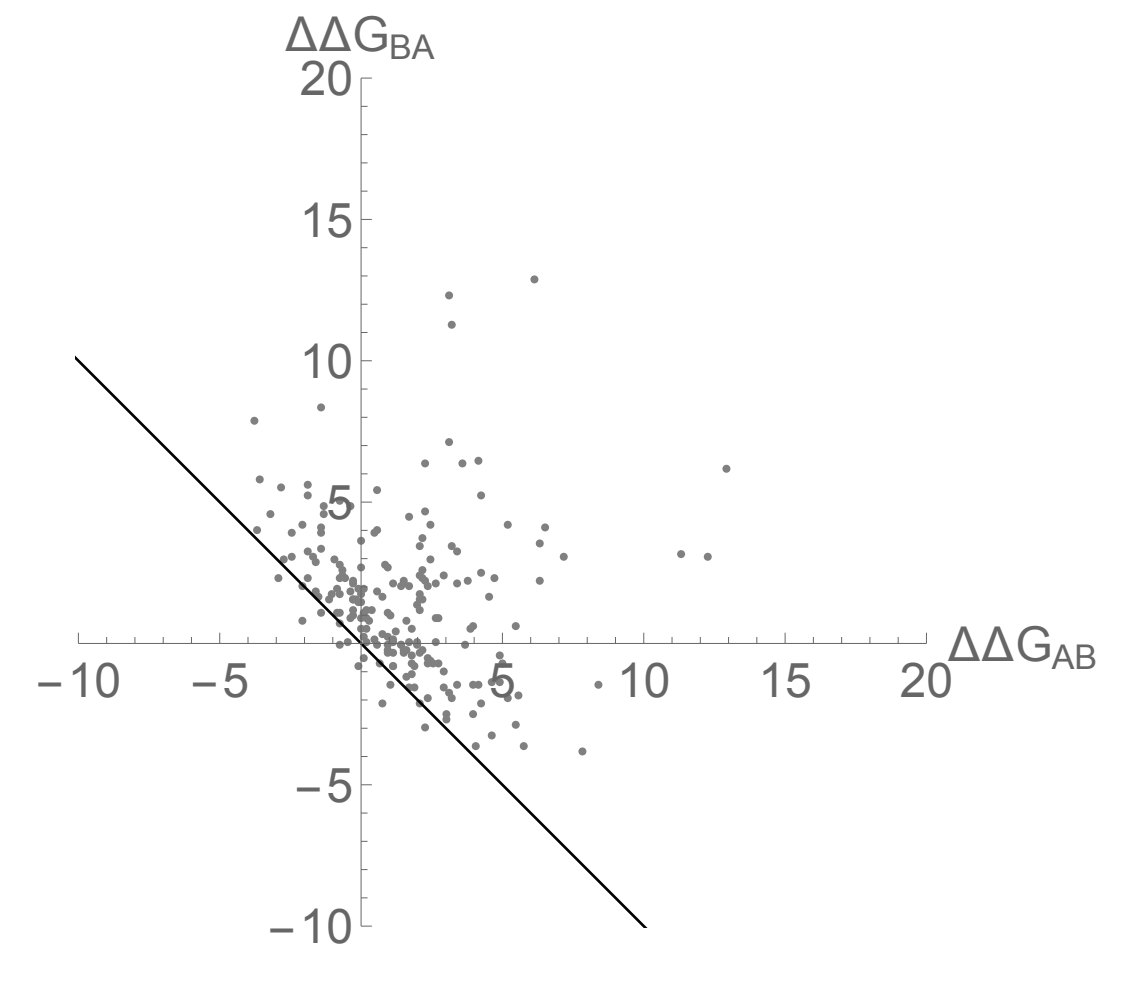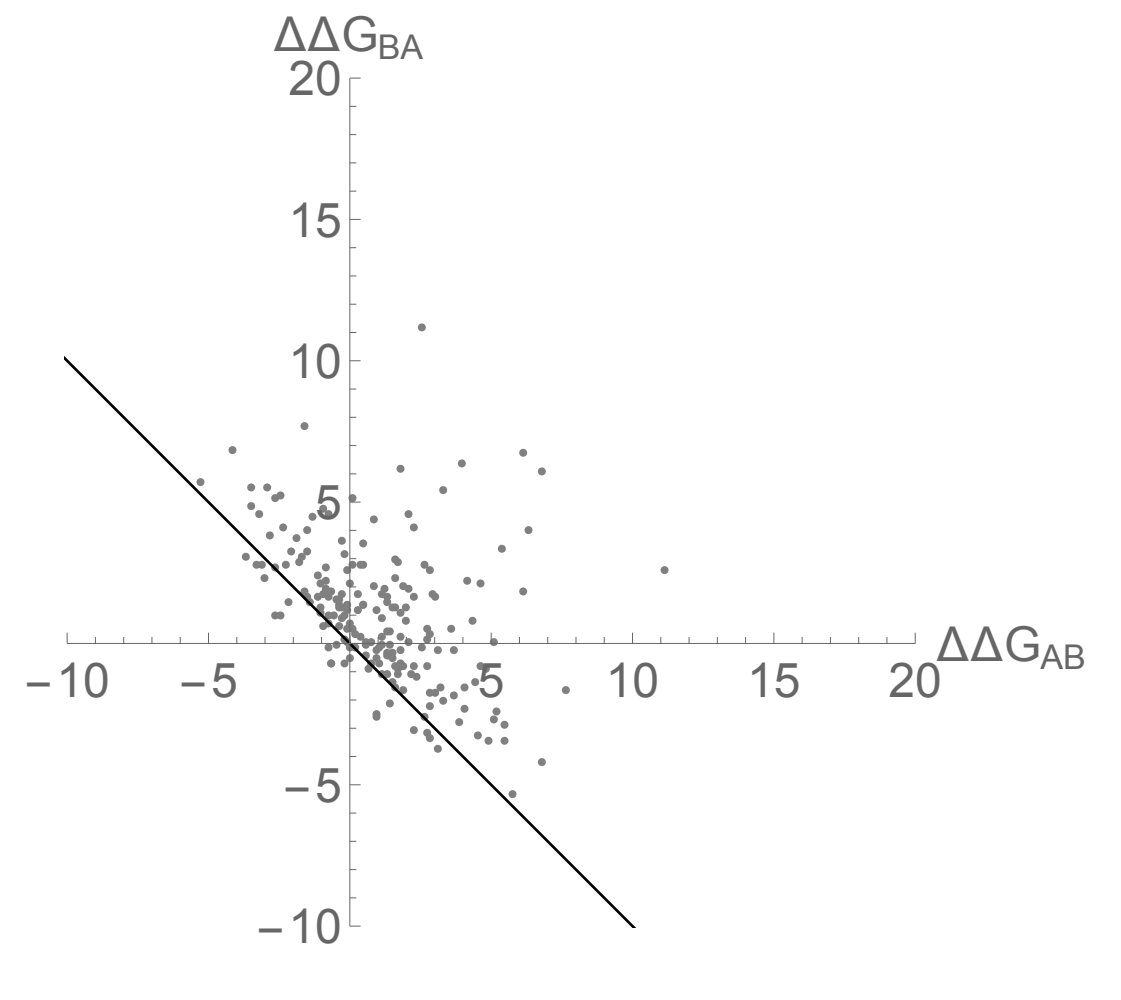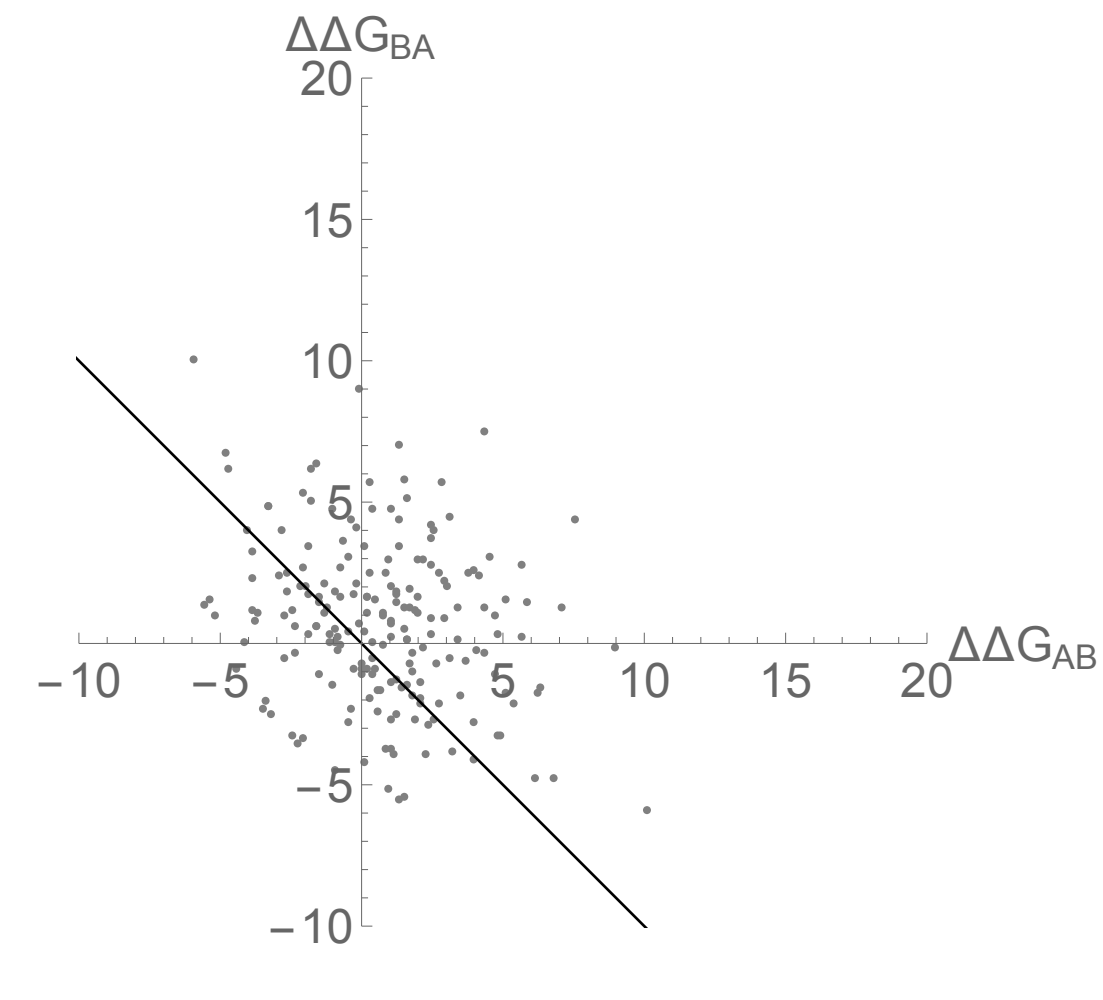

3

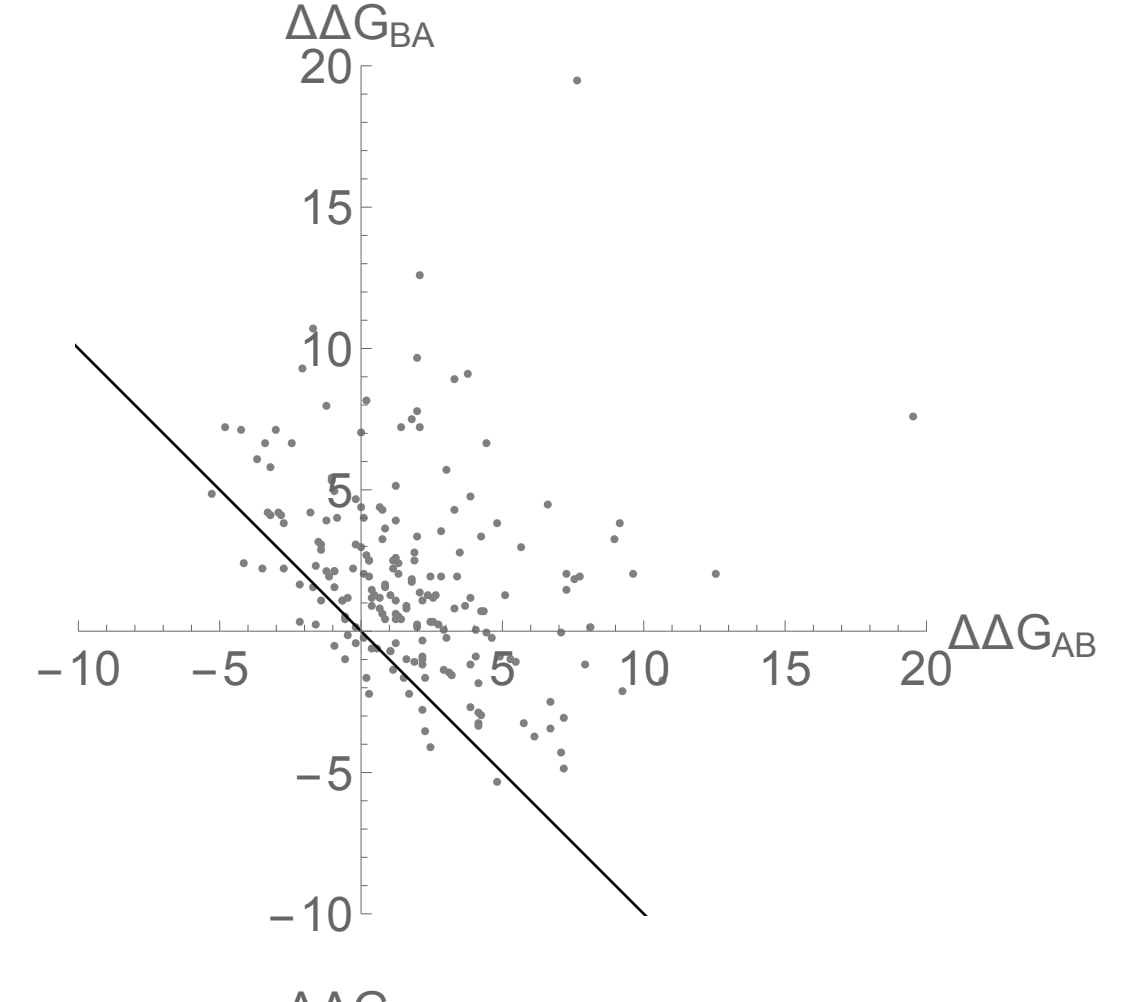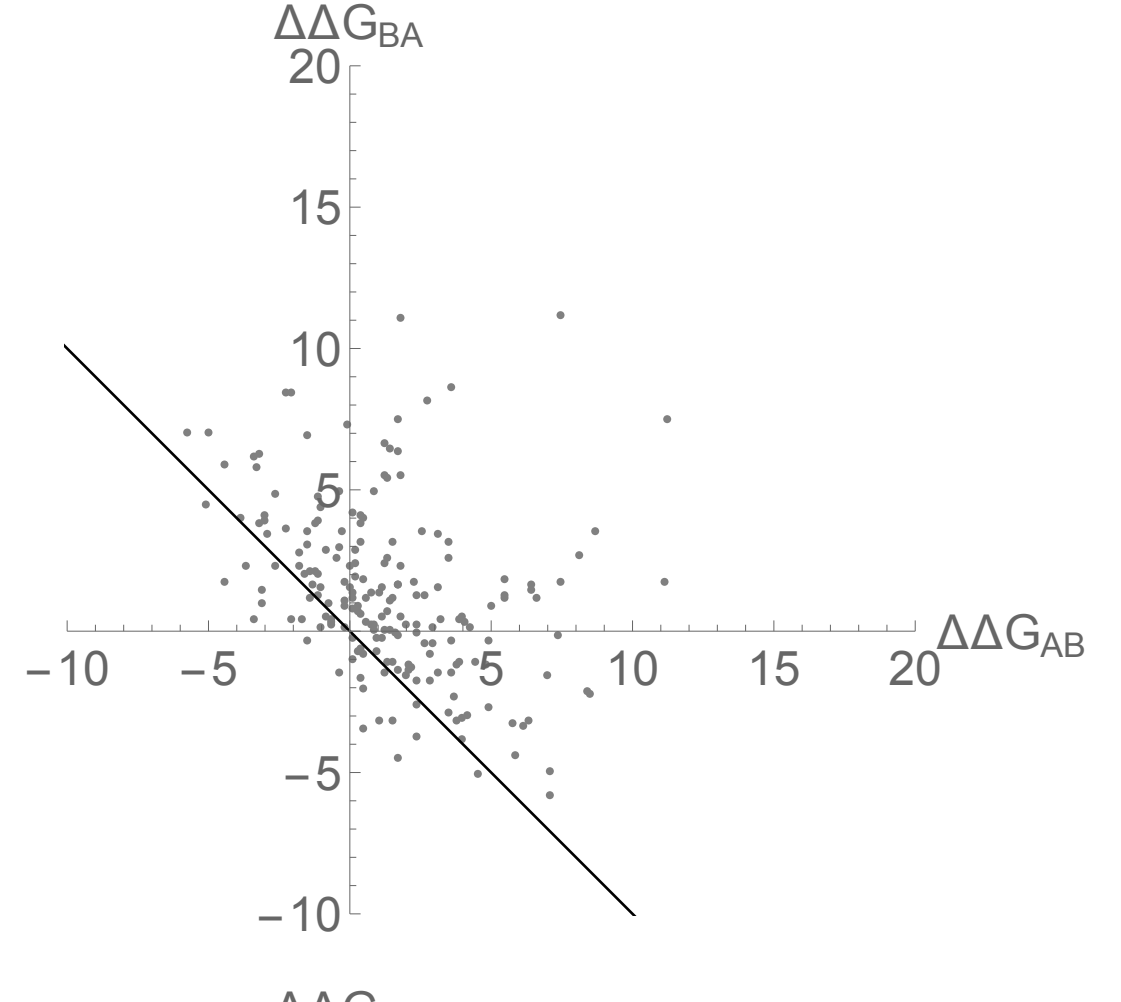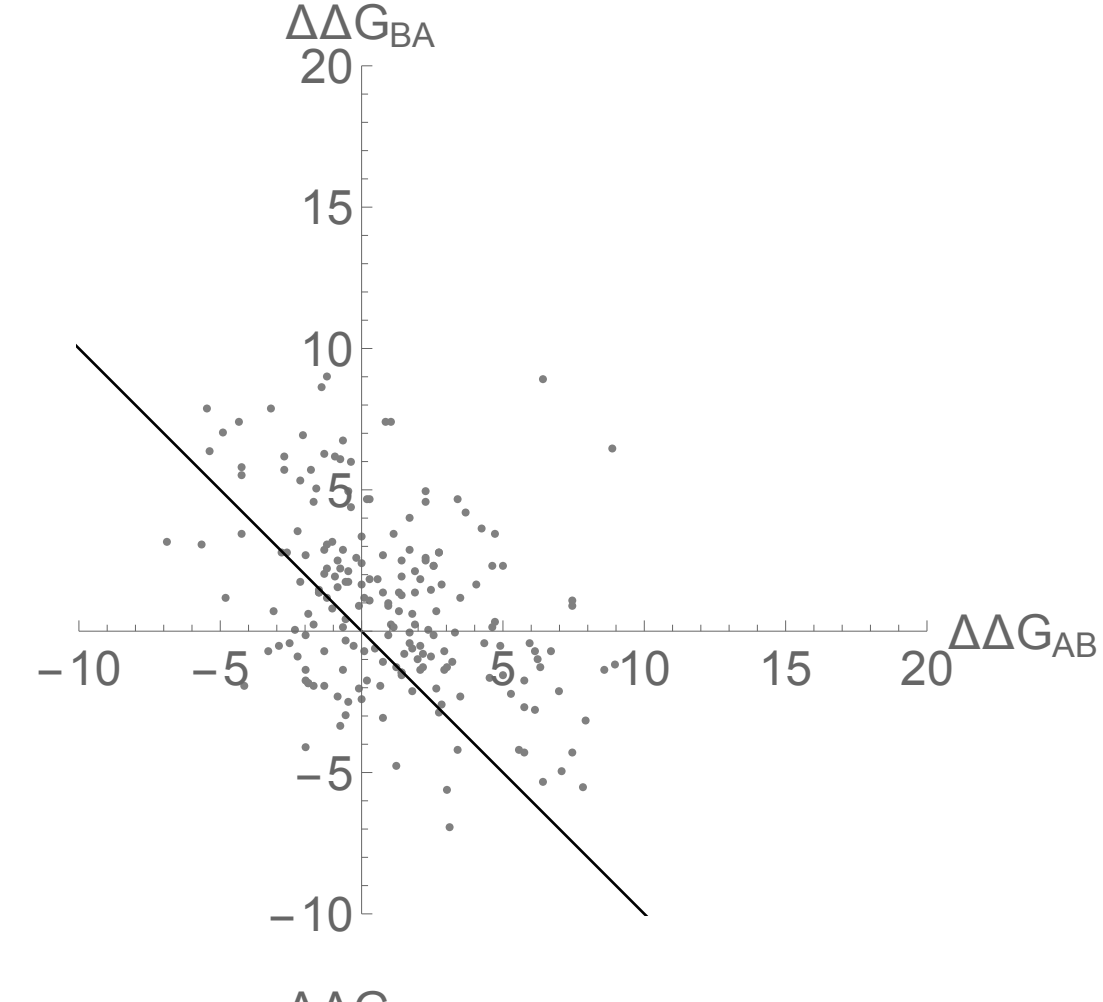

4

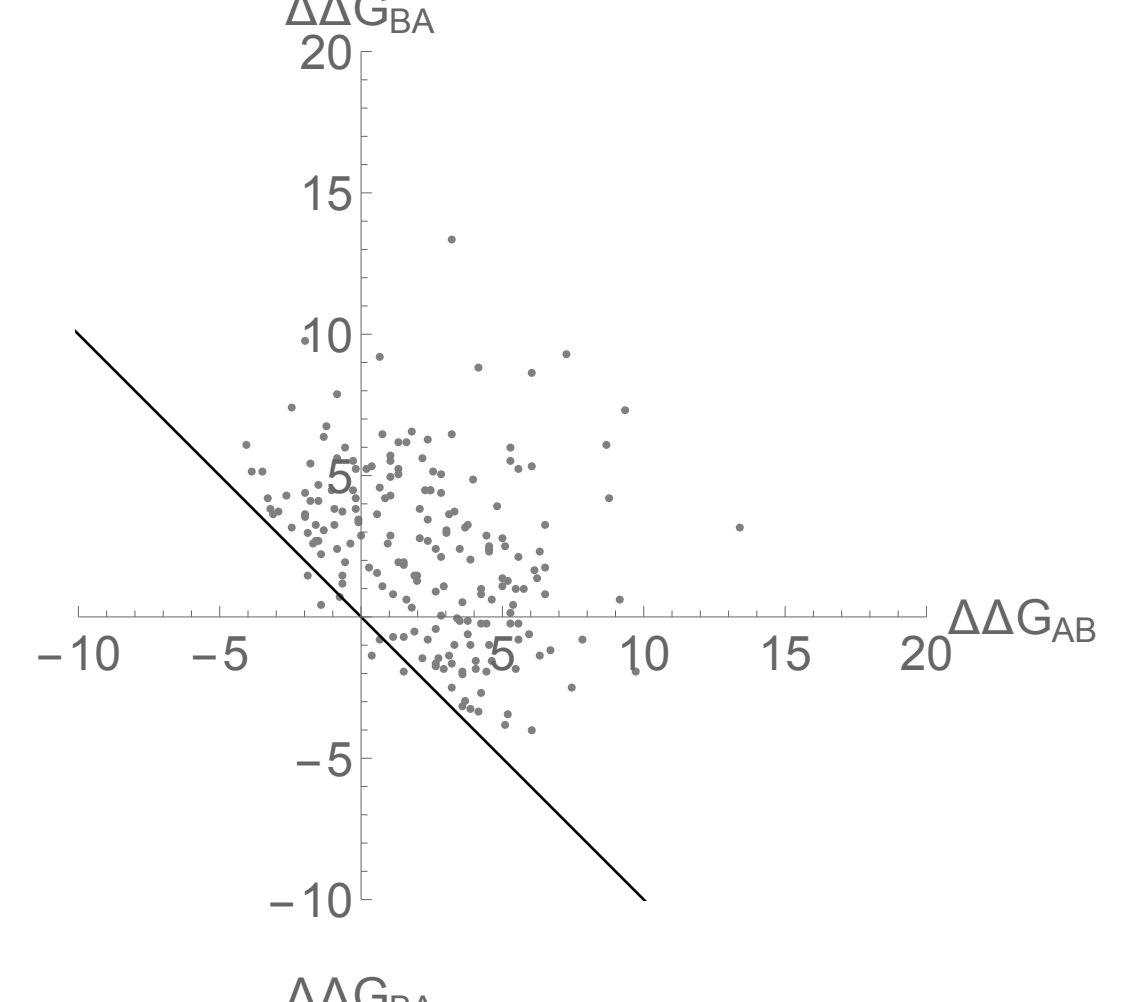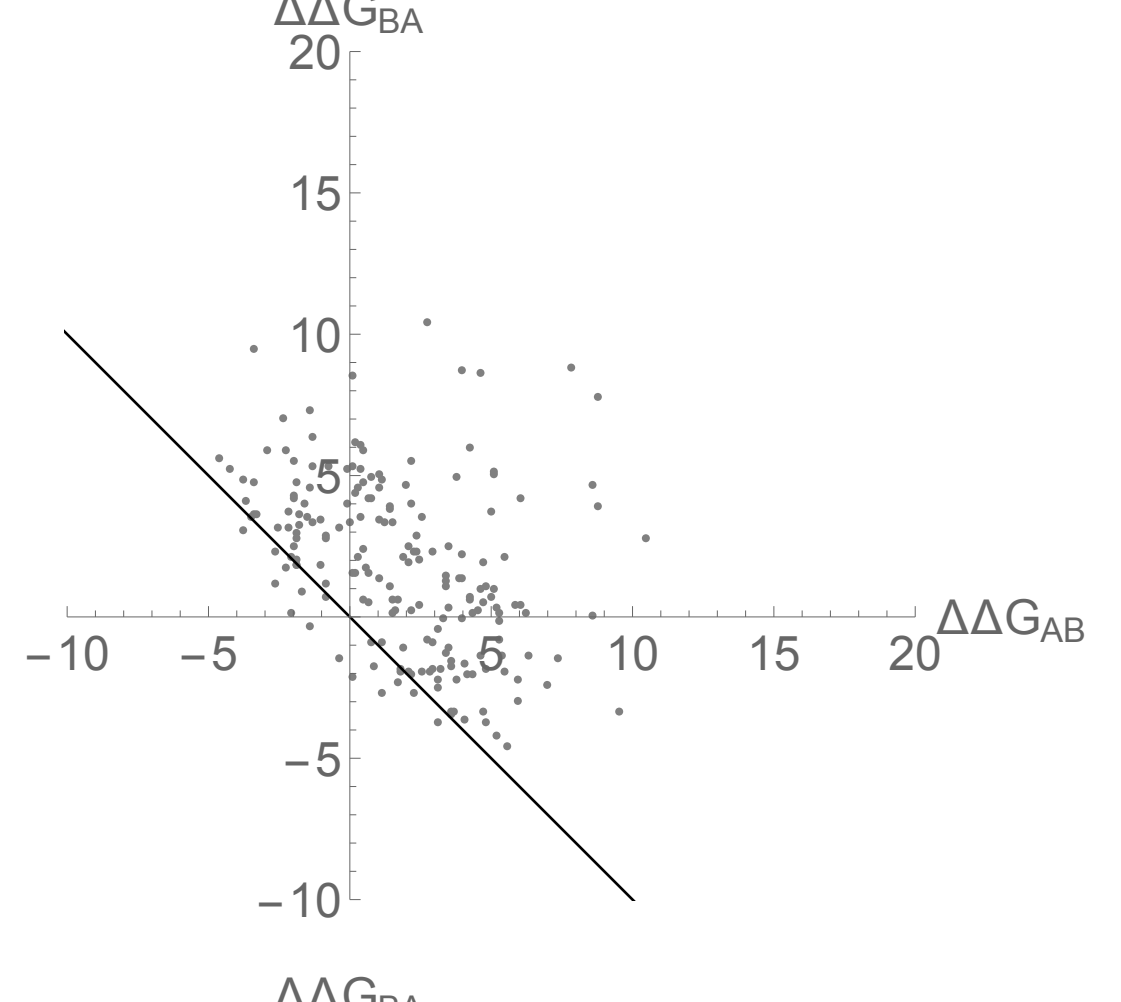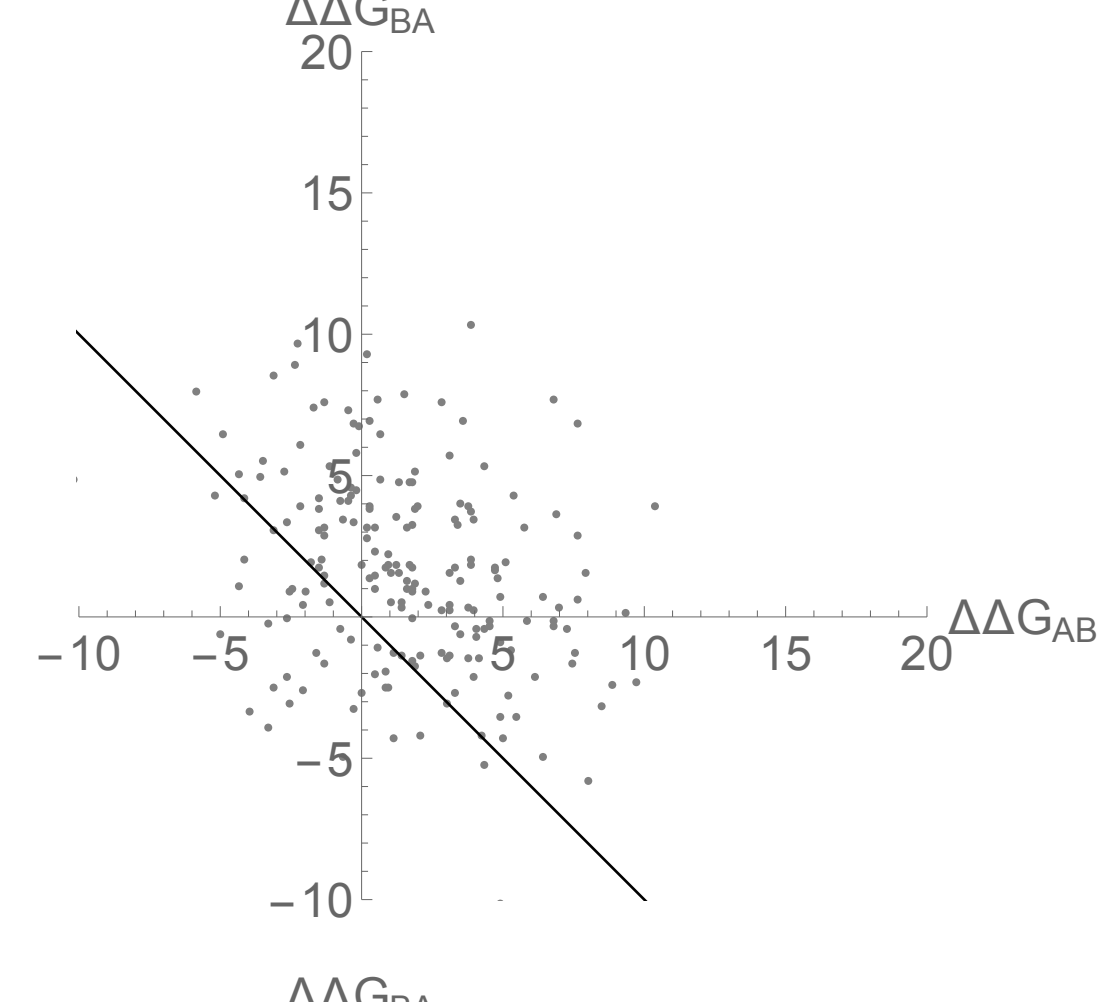

5

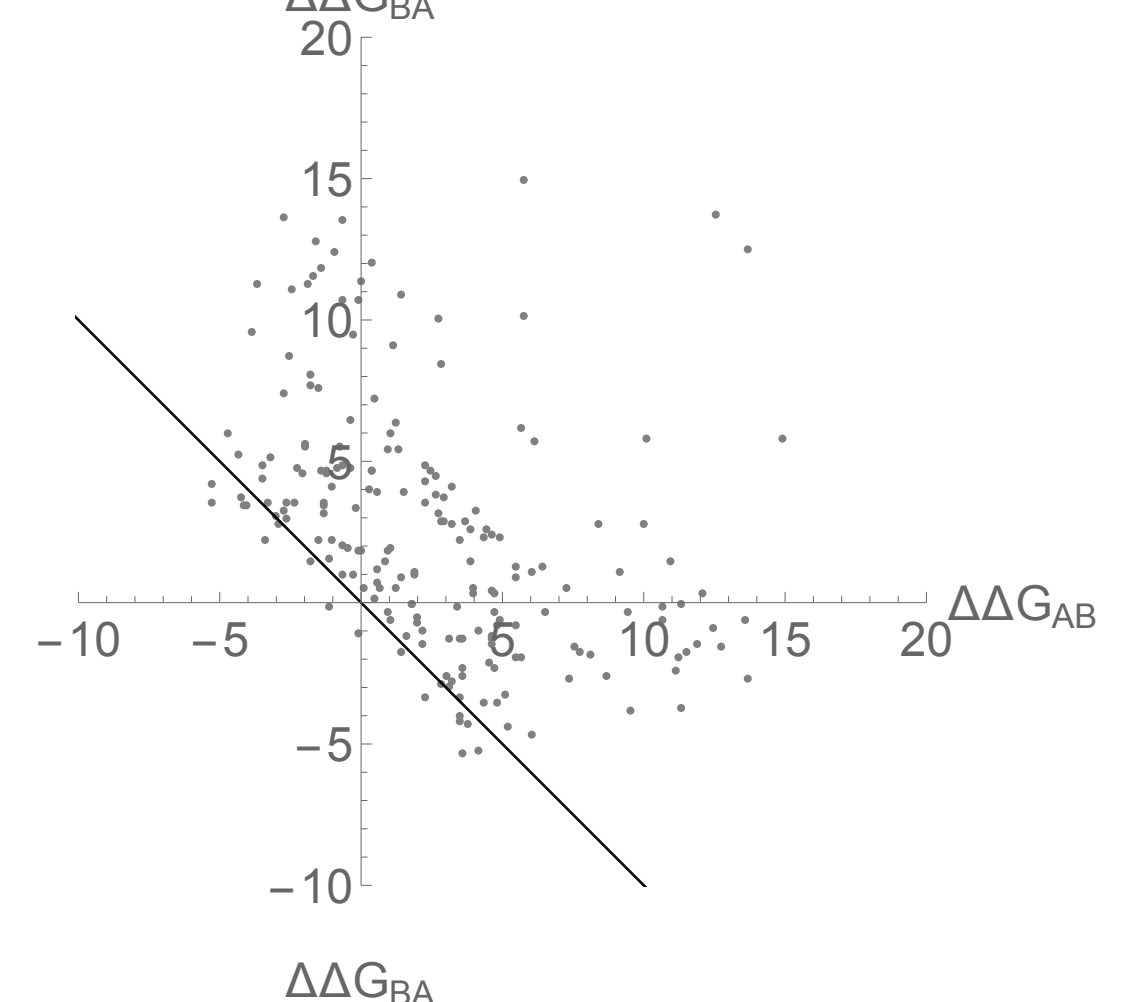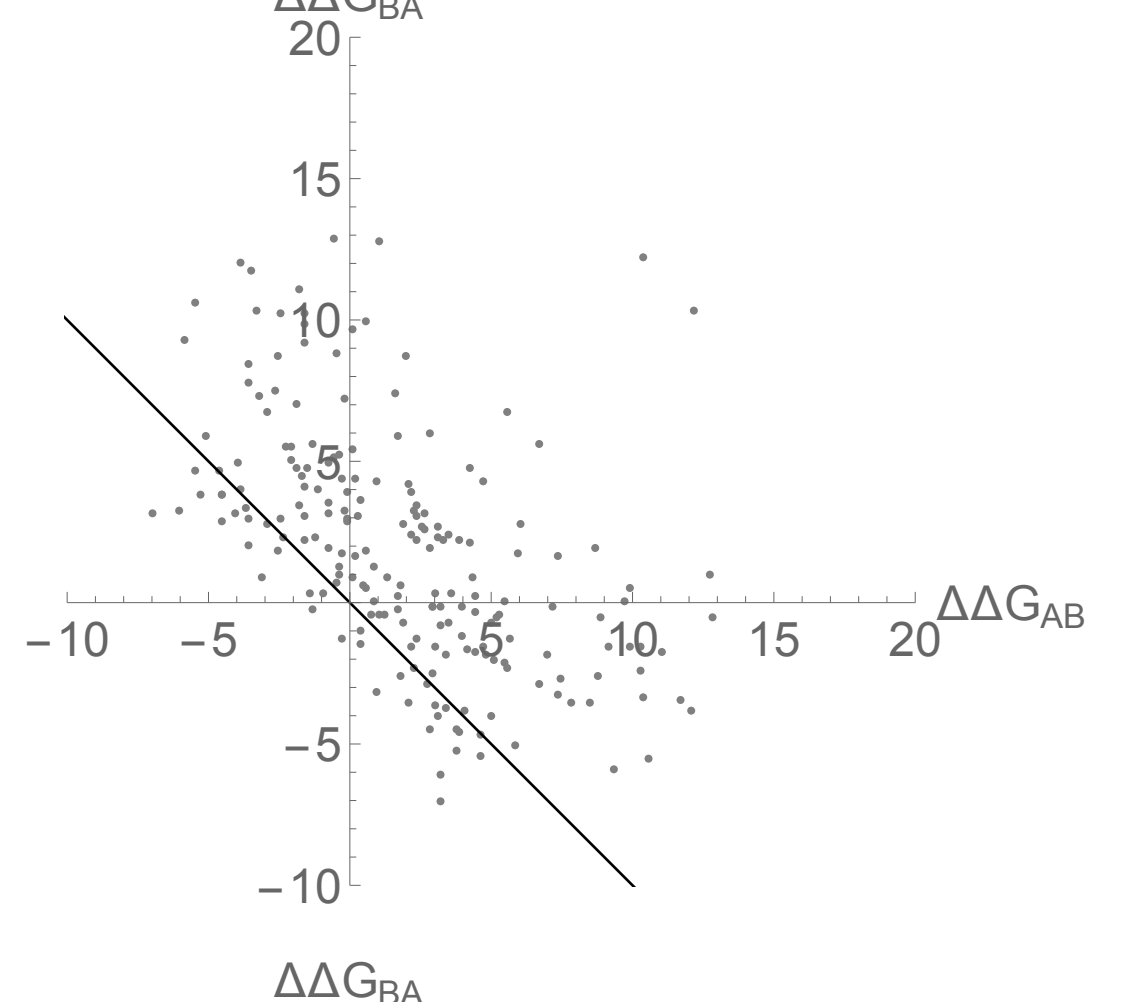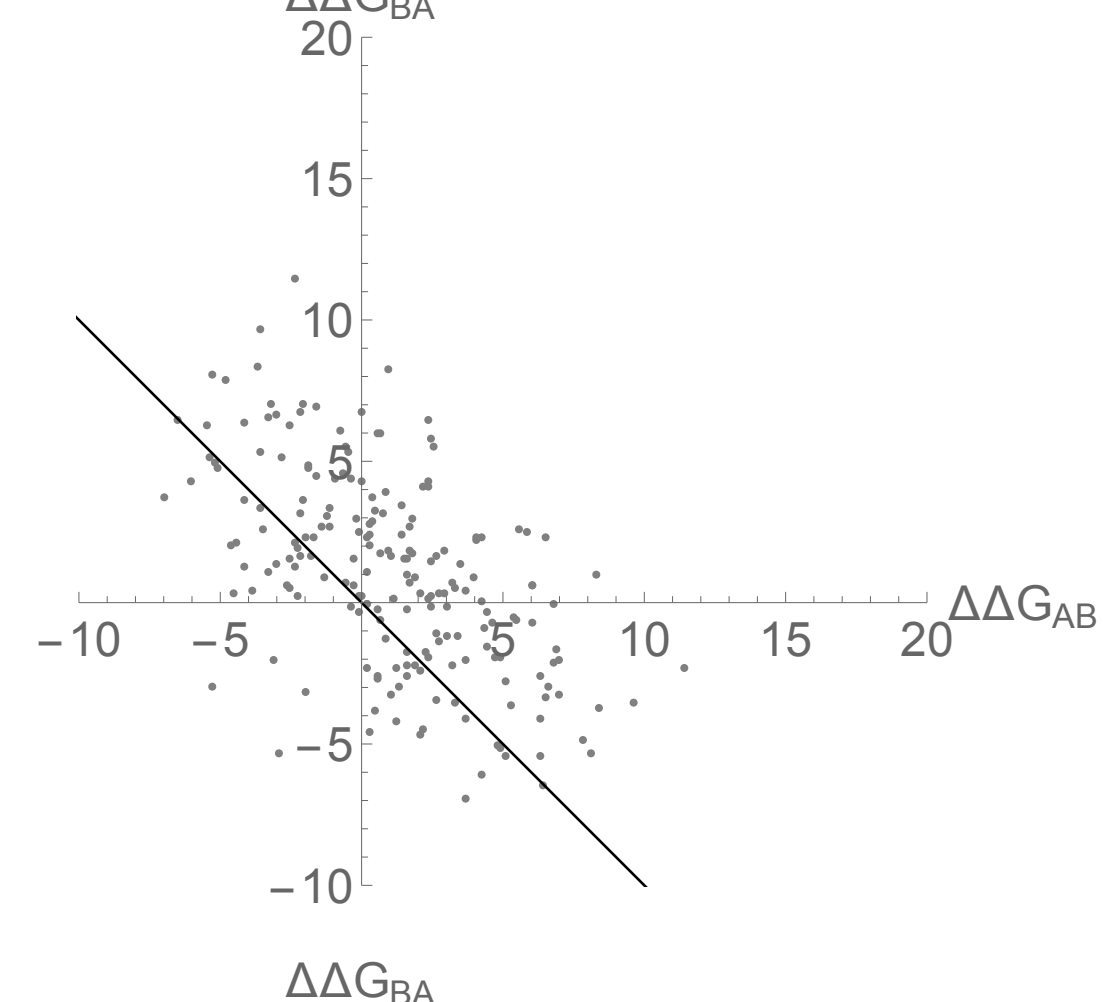

6

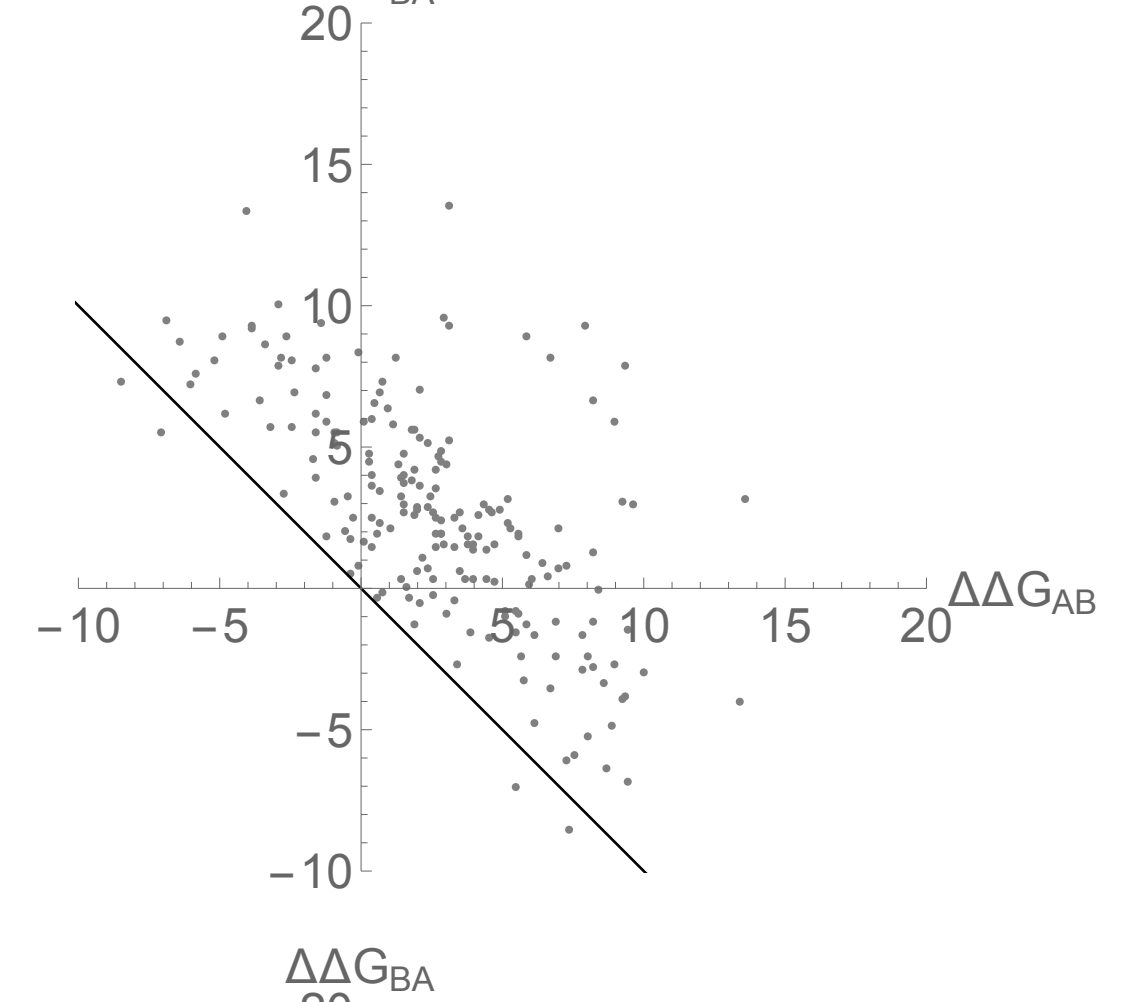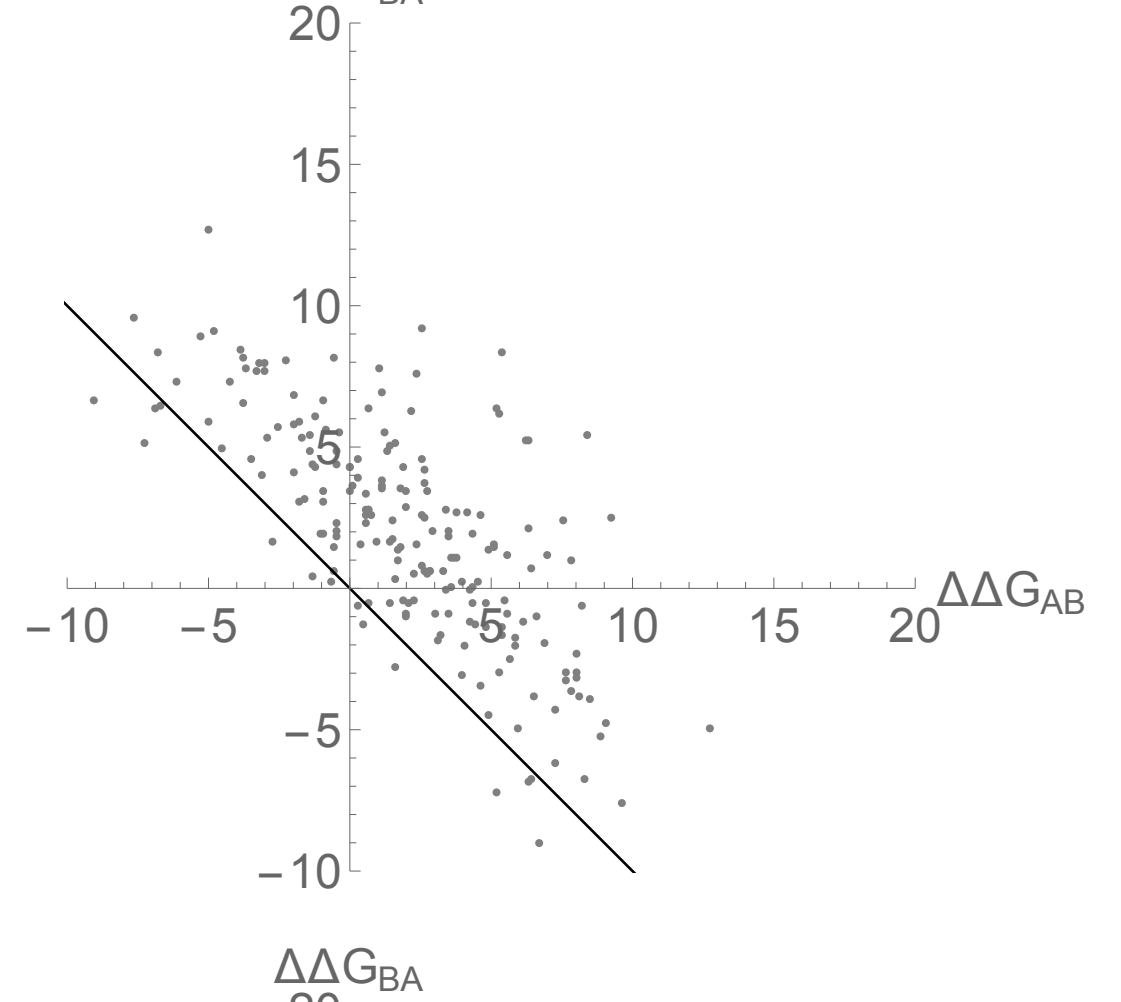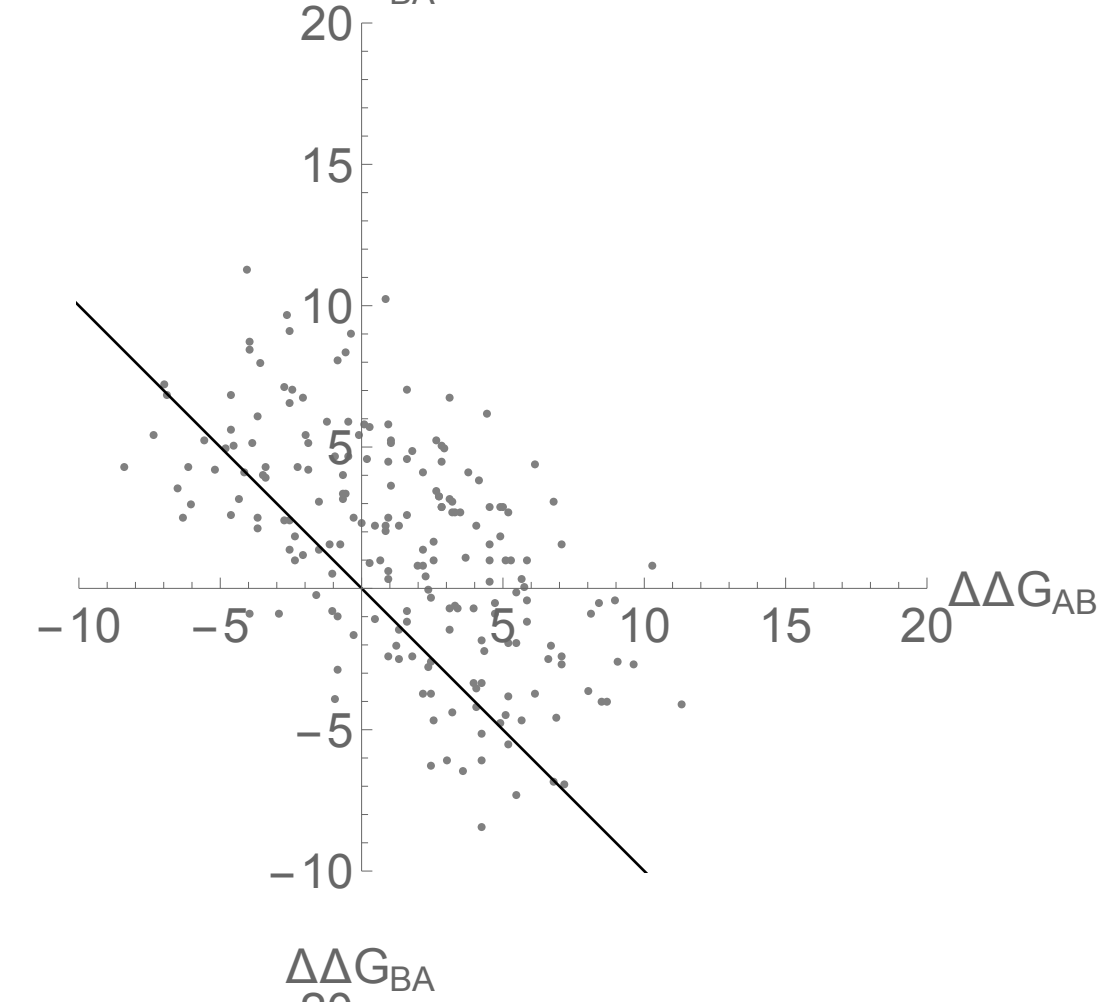

7

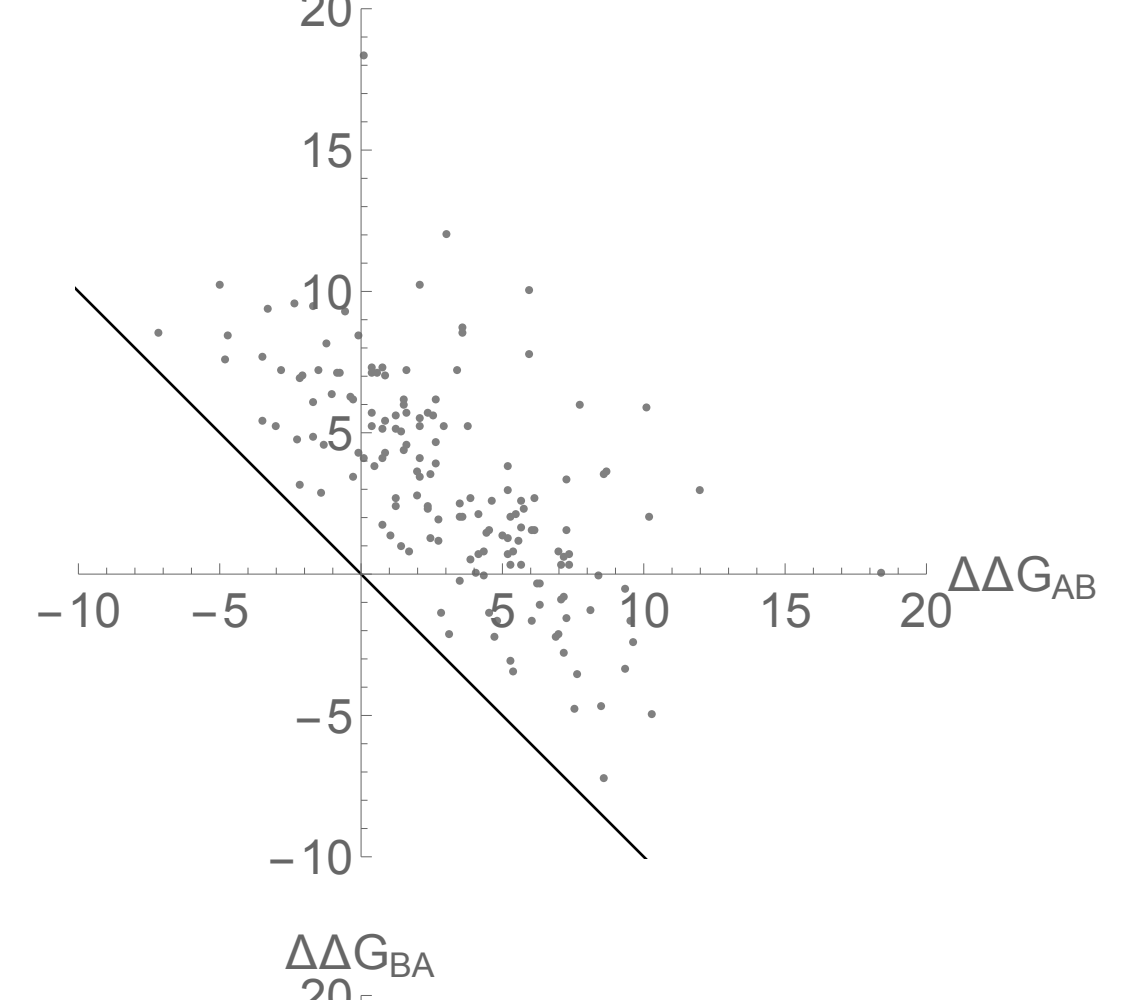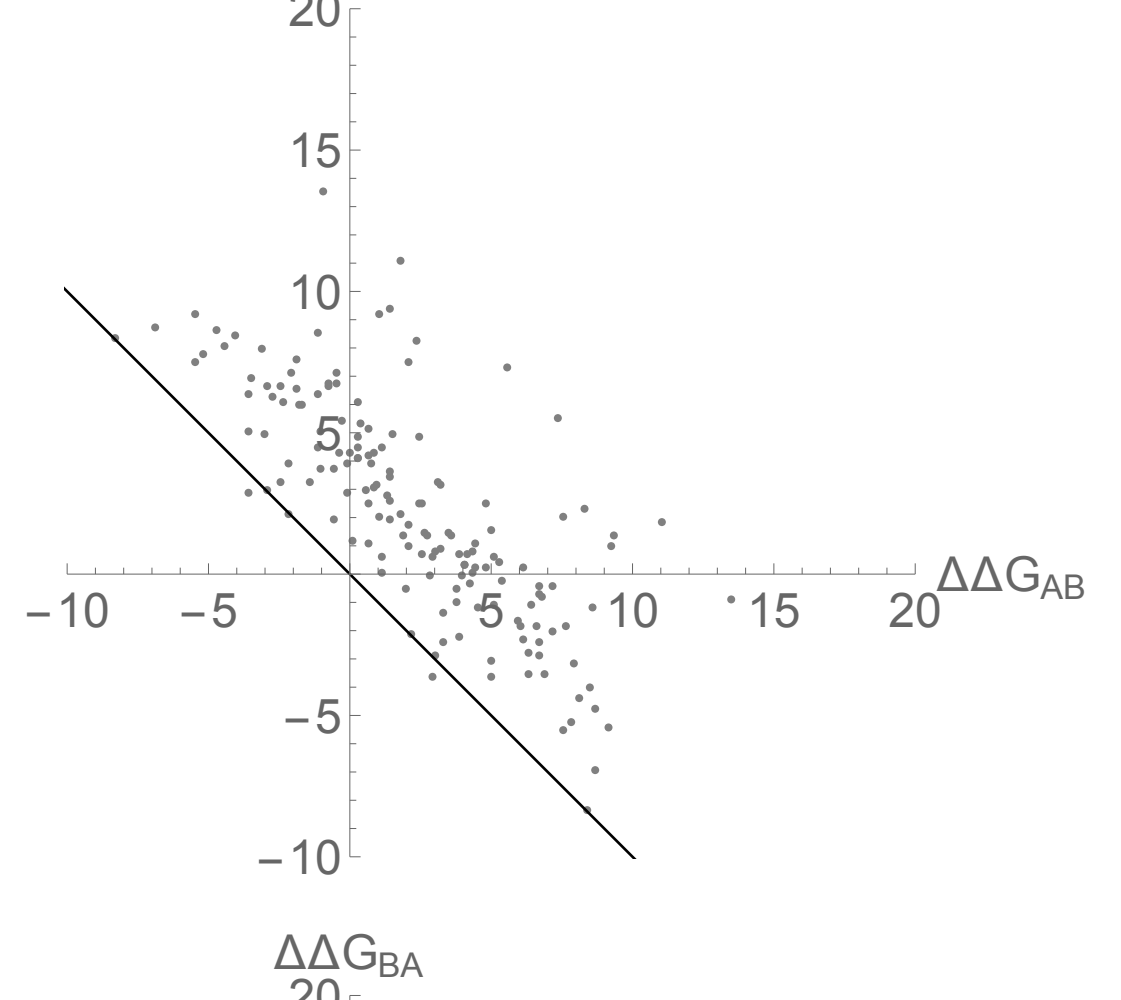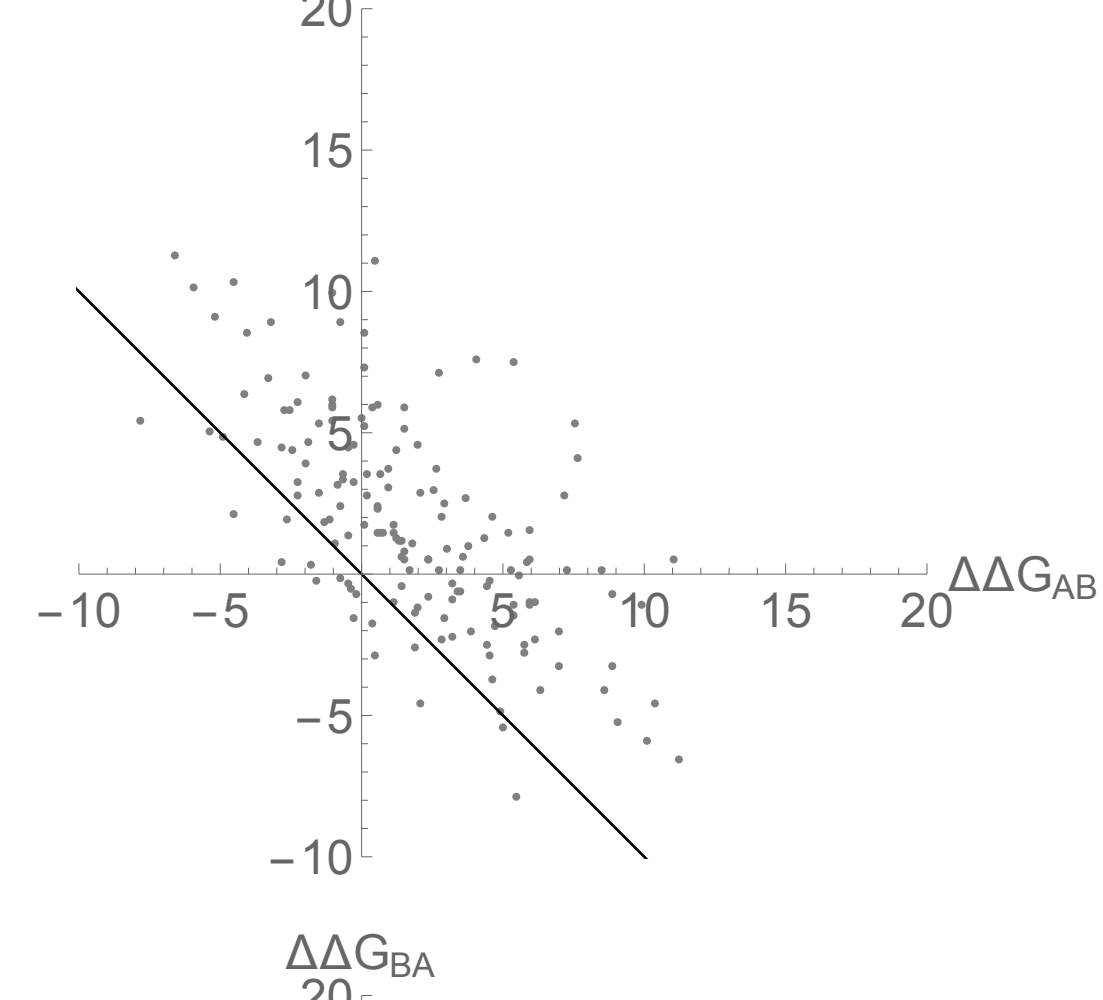

8

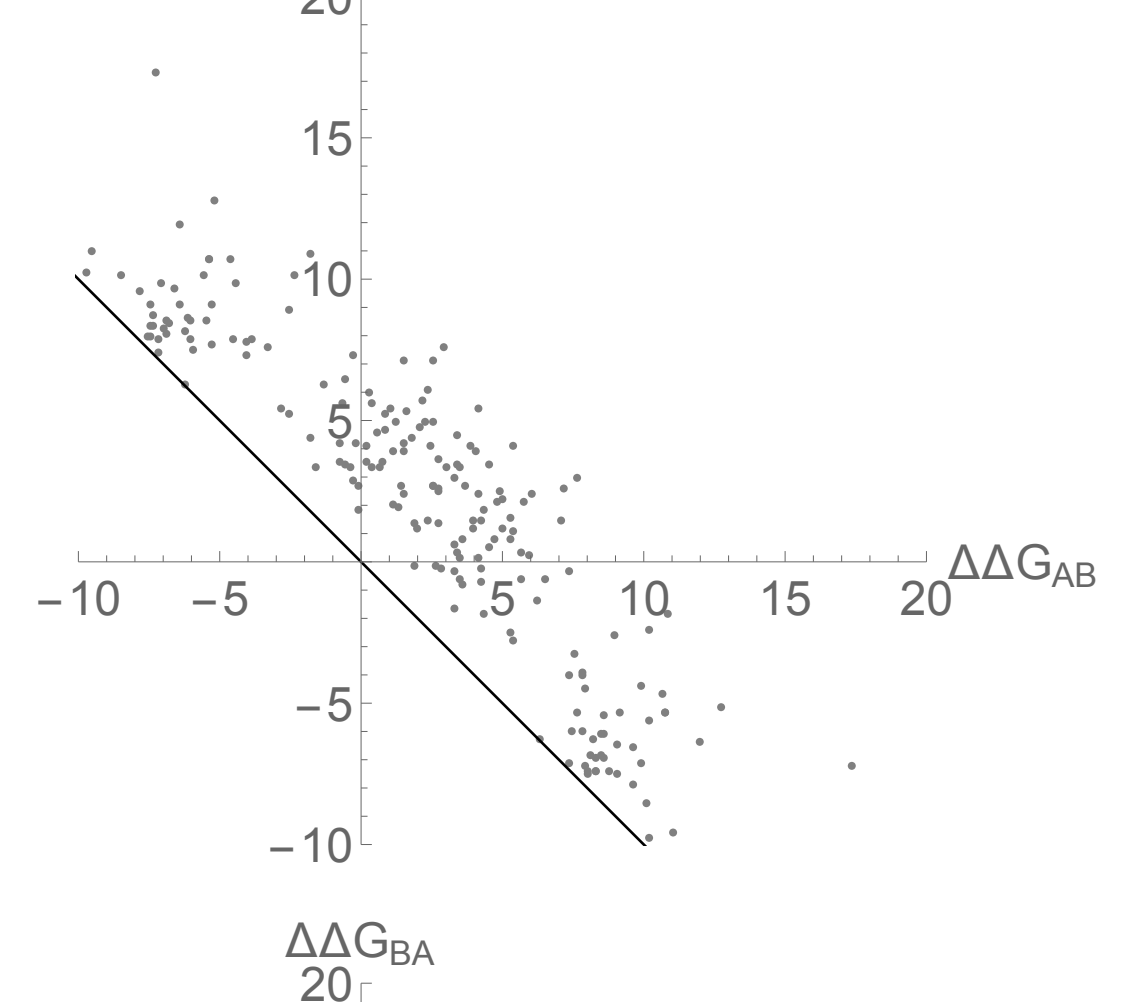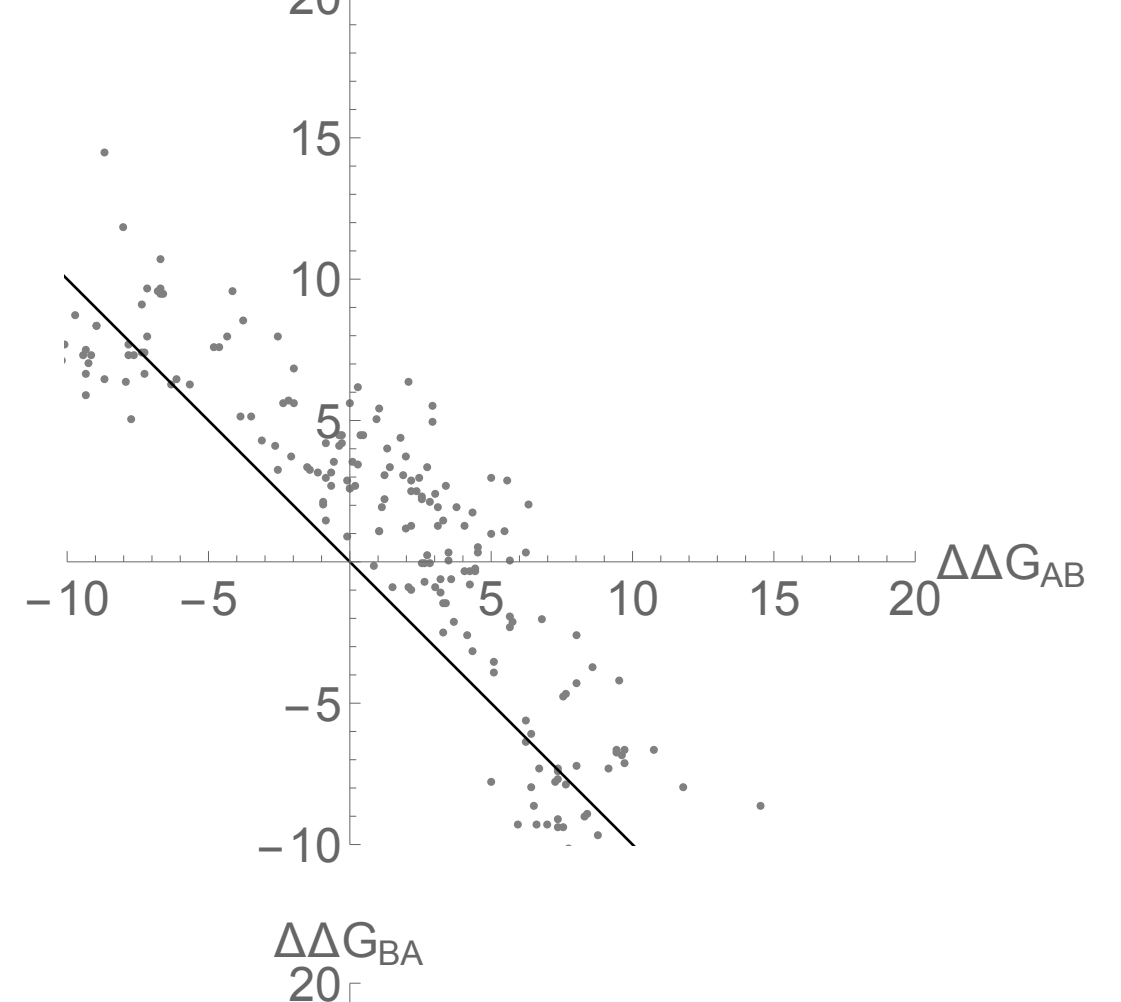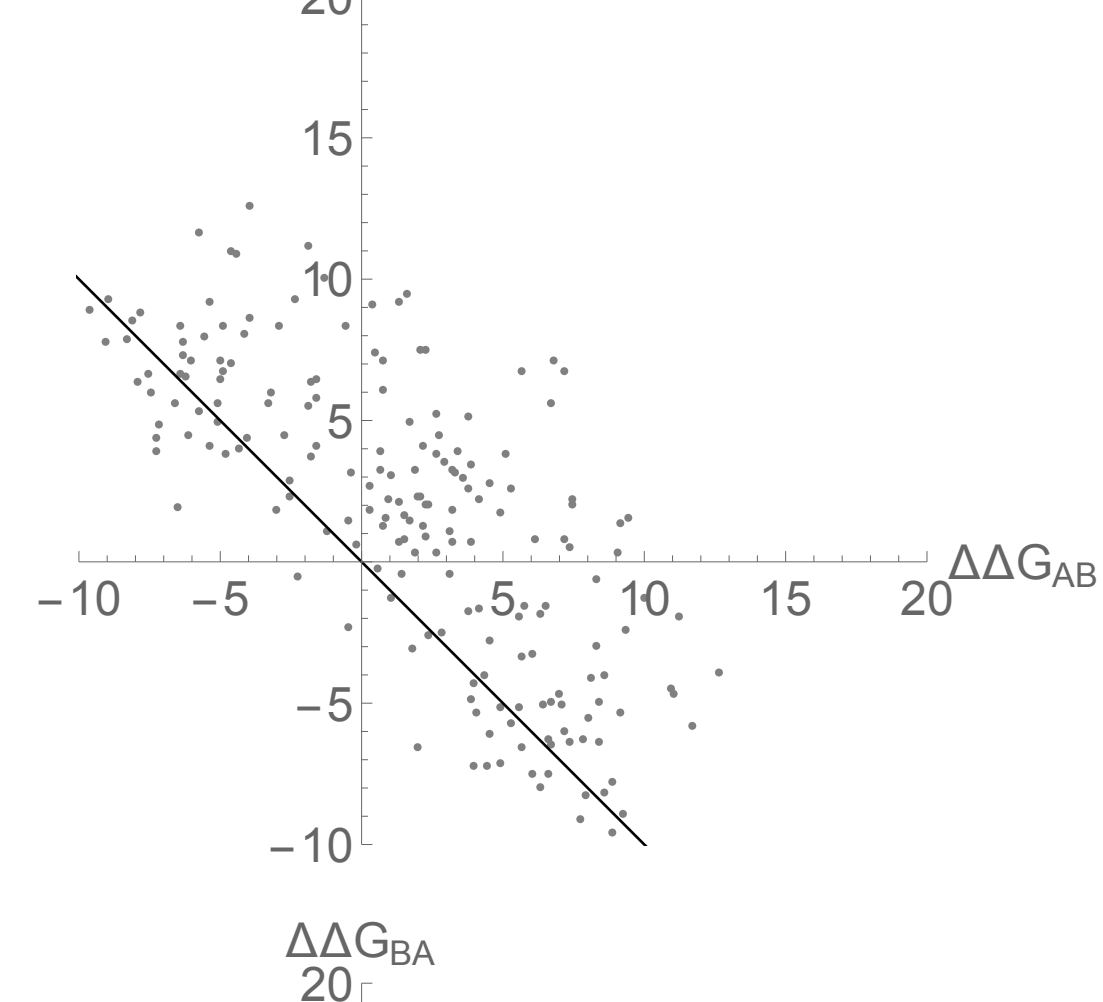

9

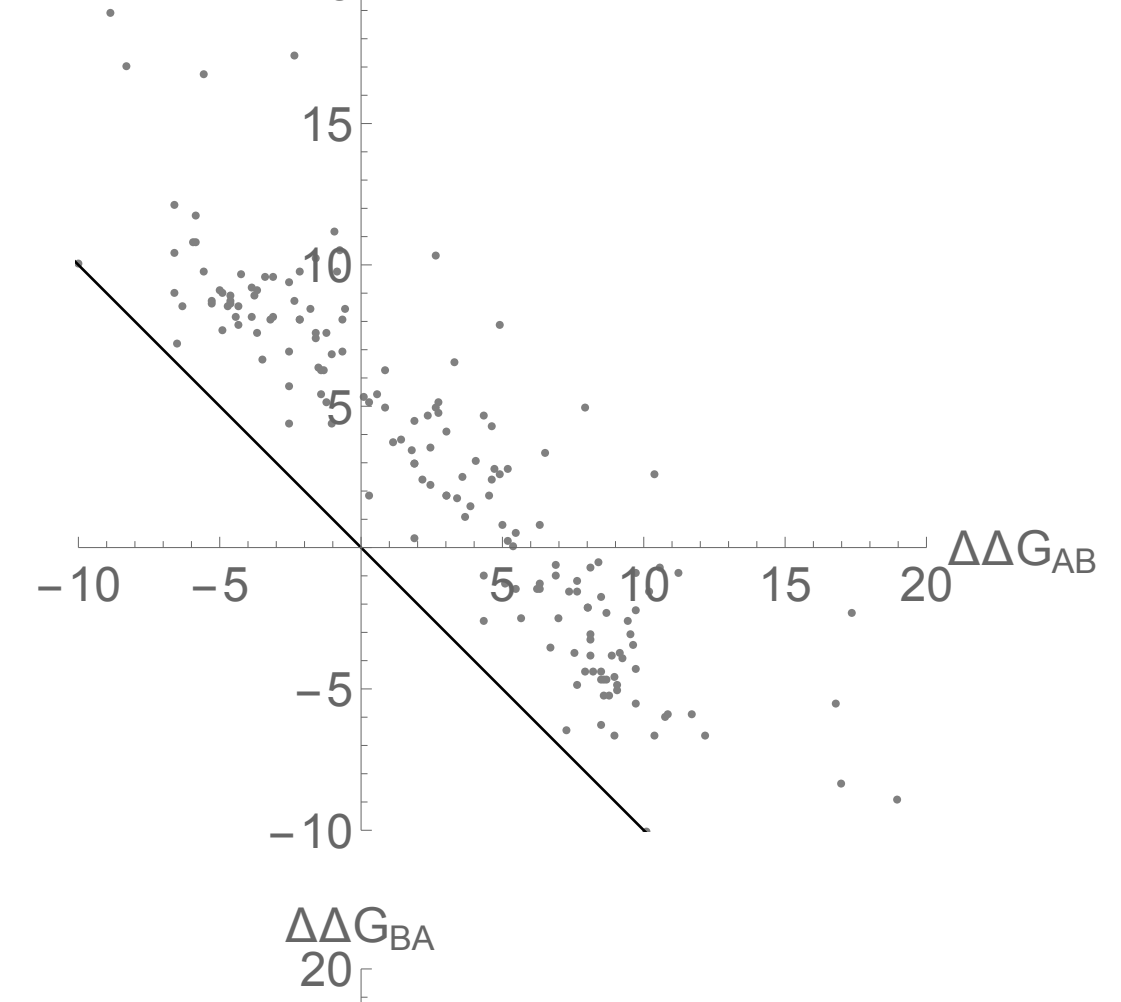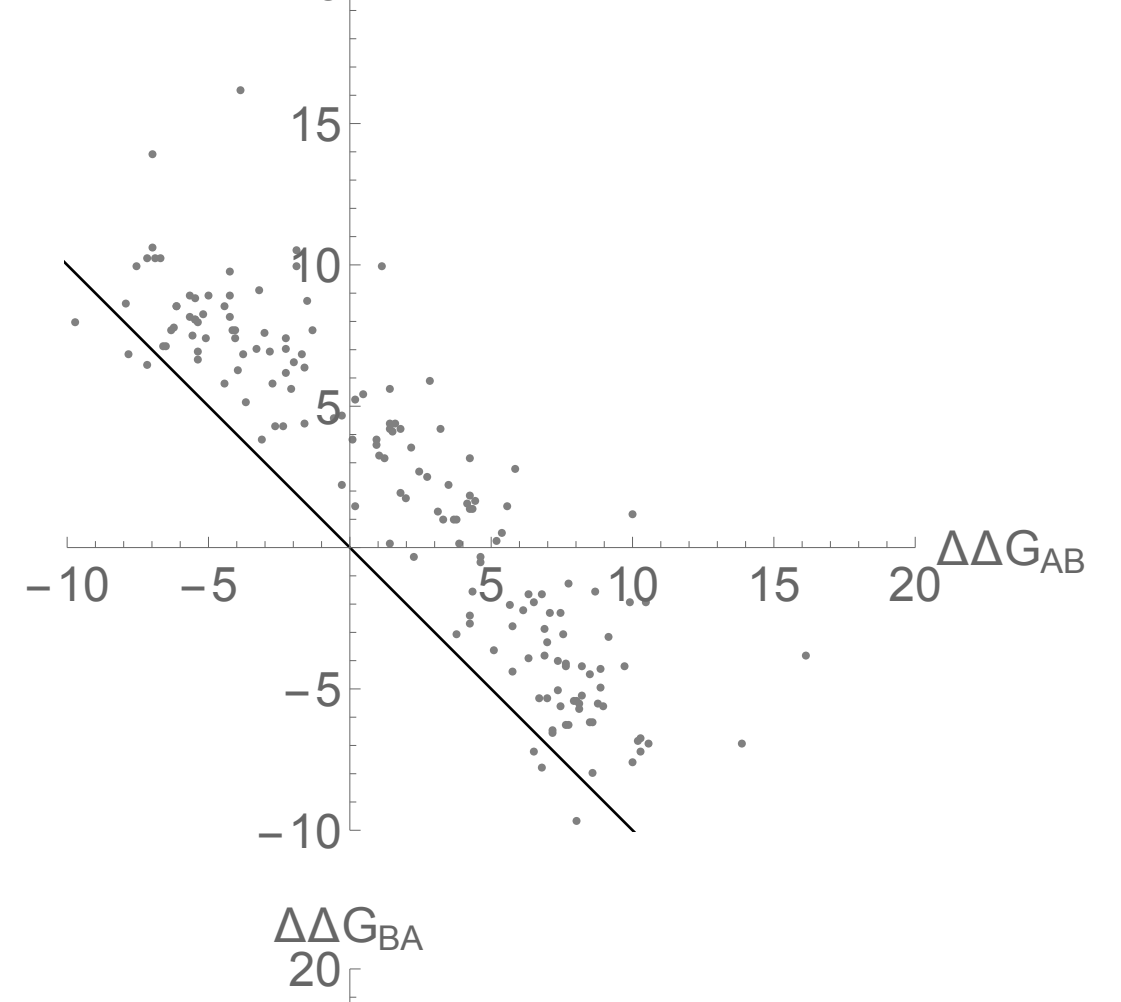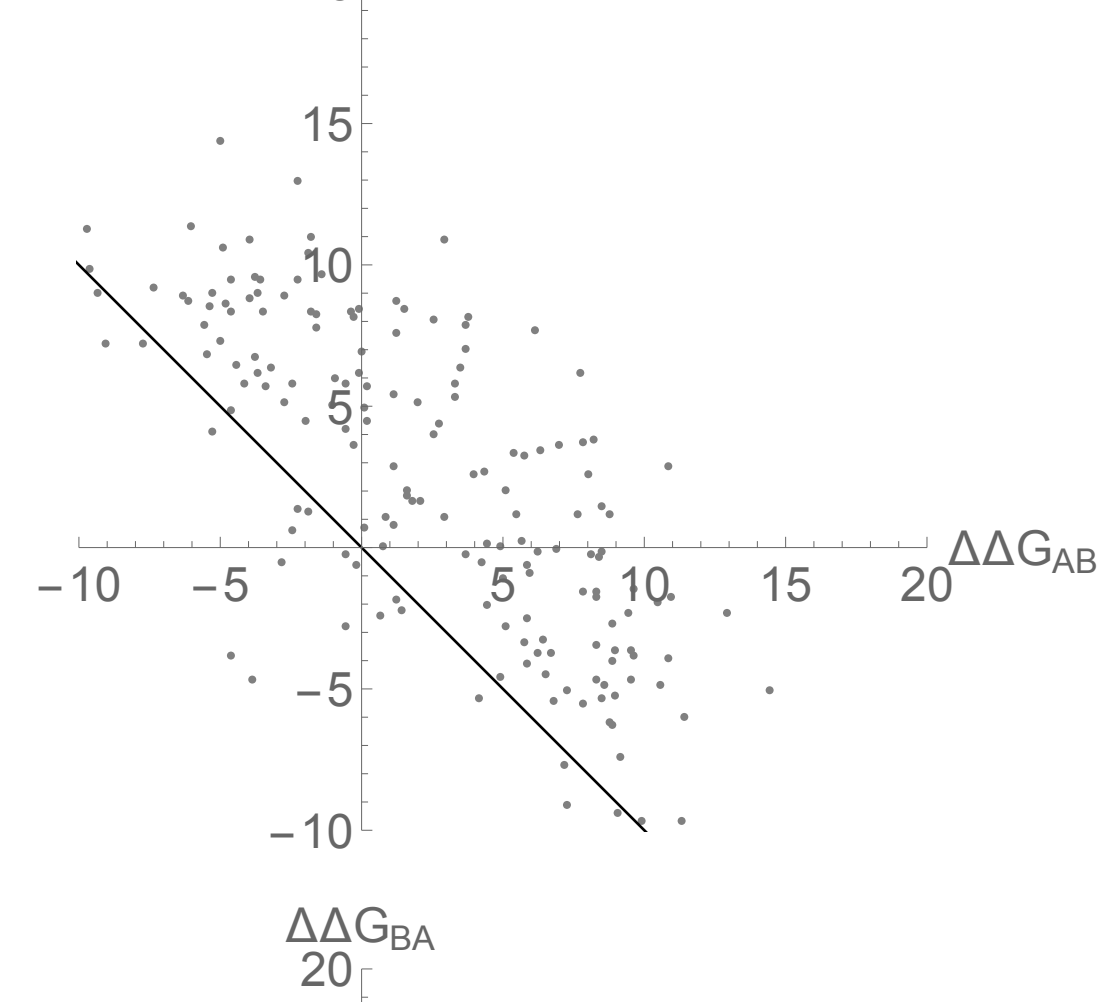

10

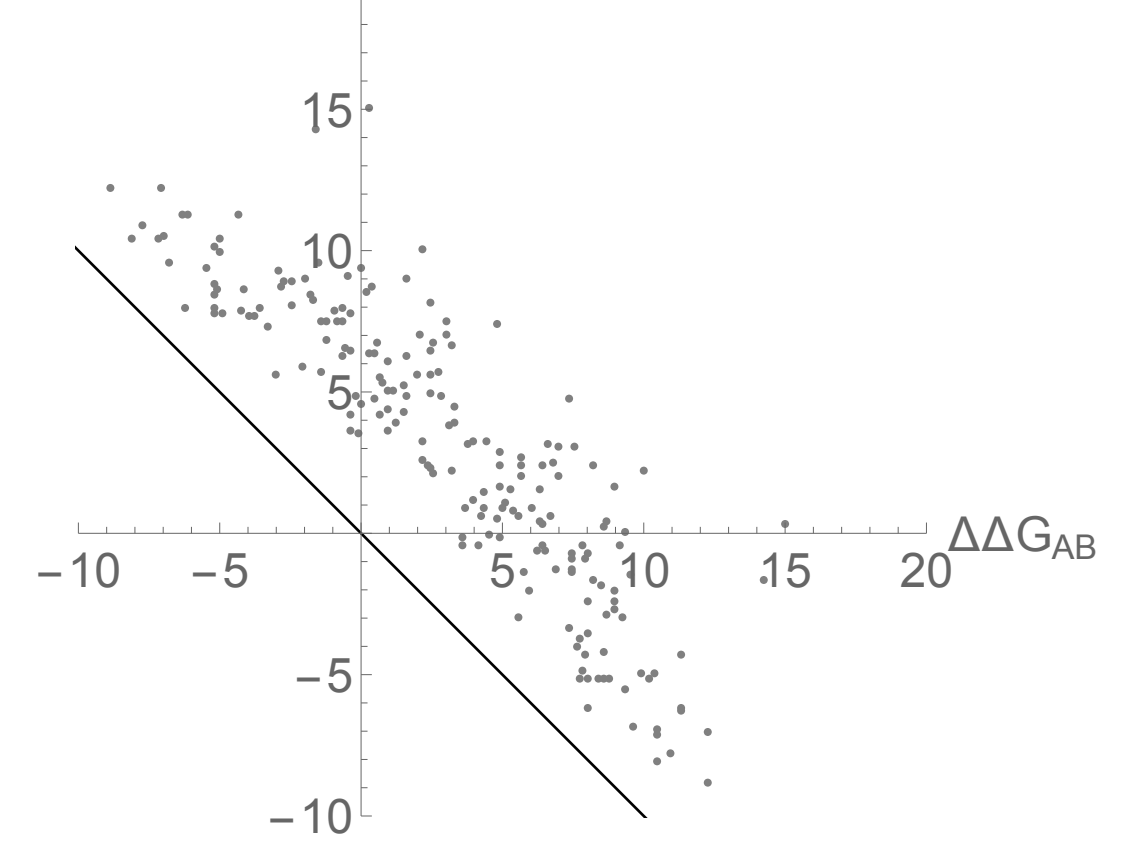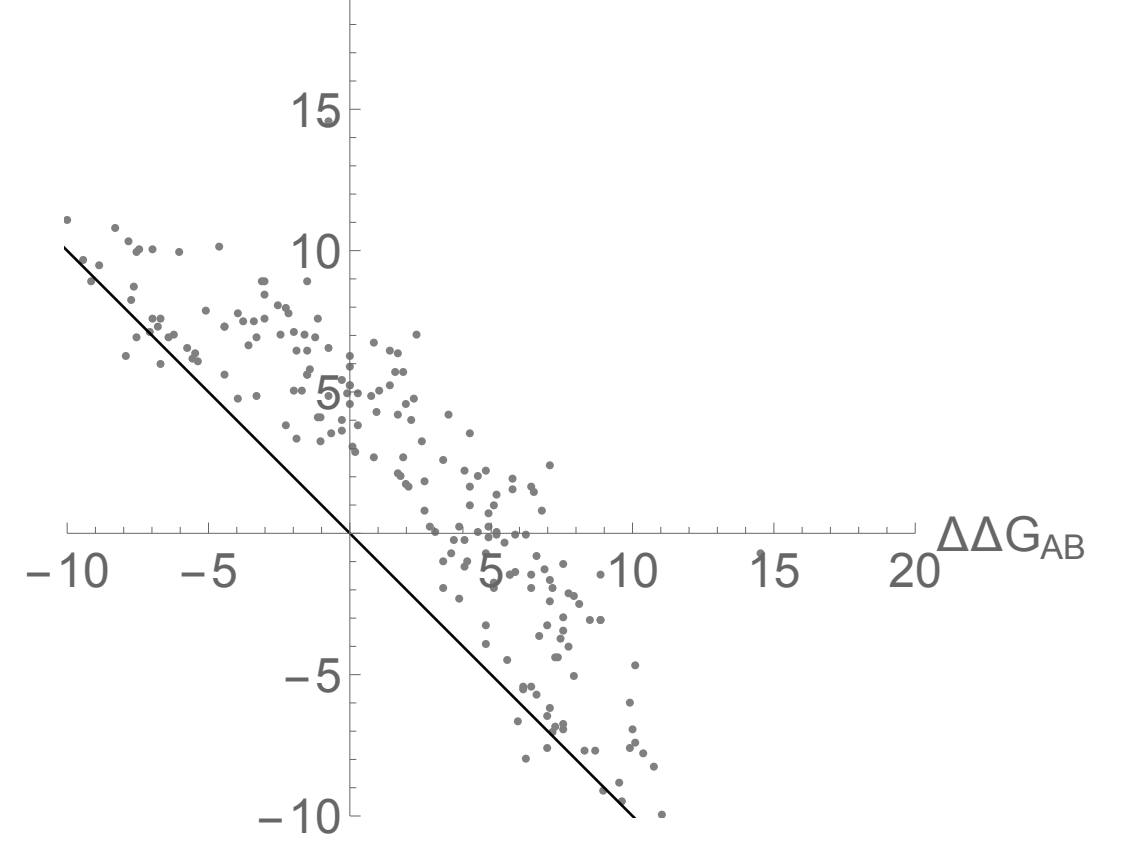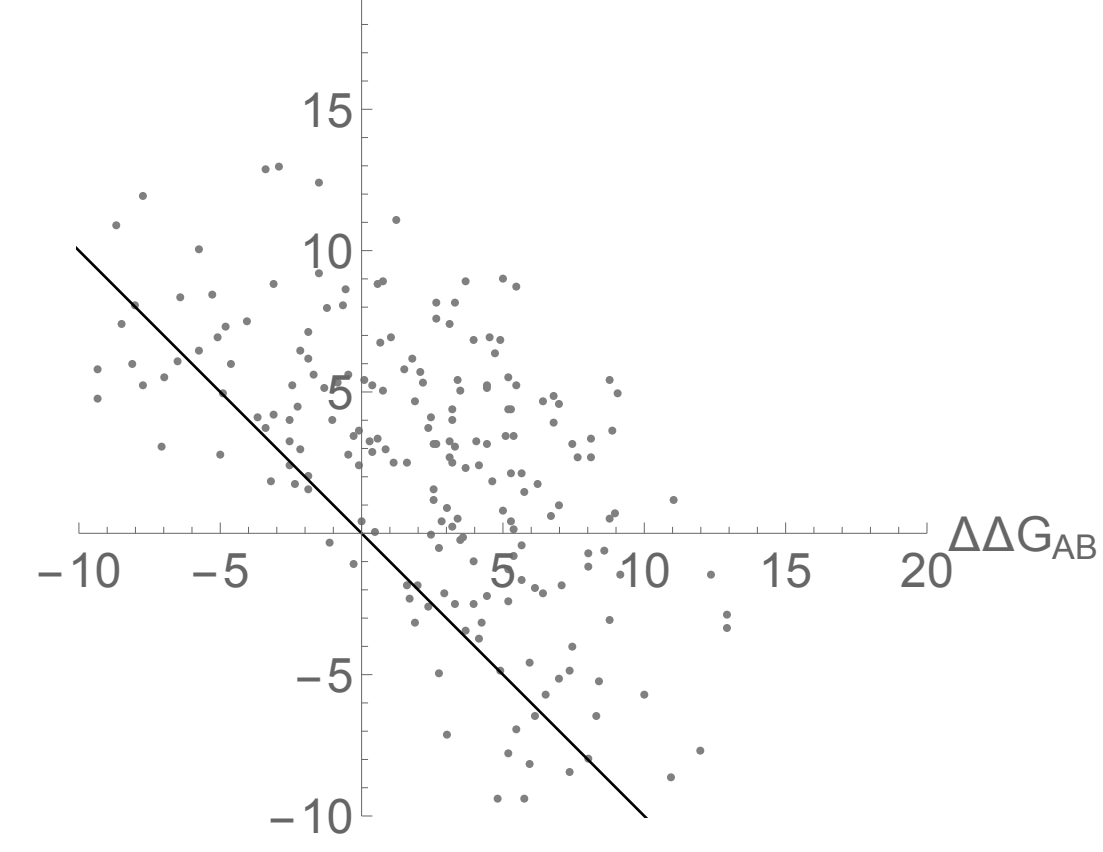

Supplement: bioinformatics_34_21_3653_s5.pdf [file bioinformatics_34_21_3653_s5.pdf]
