# Supplementary figures and images for: Self-consistency test reveals systematic bias in programs for prediction change of stability upon mutation
Source: PubMed Central journal article supplement — Bioinformatics. 2018 May 2;34(21):3653–8. doi: 10.1093/bioinformatics/bty340 (PMC6198859; doi:10.1093/bioinformatics/bty340), 2018-05-02

**a**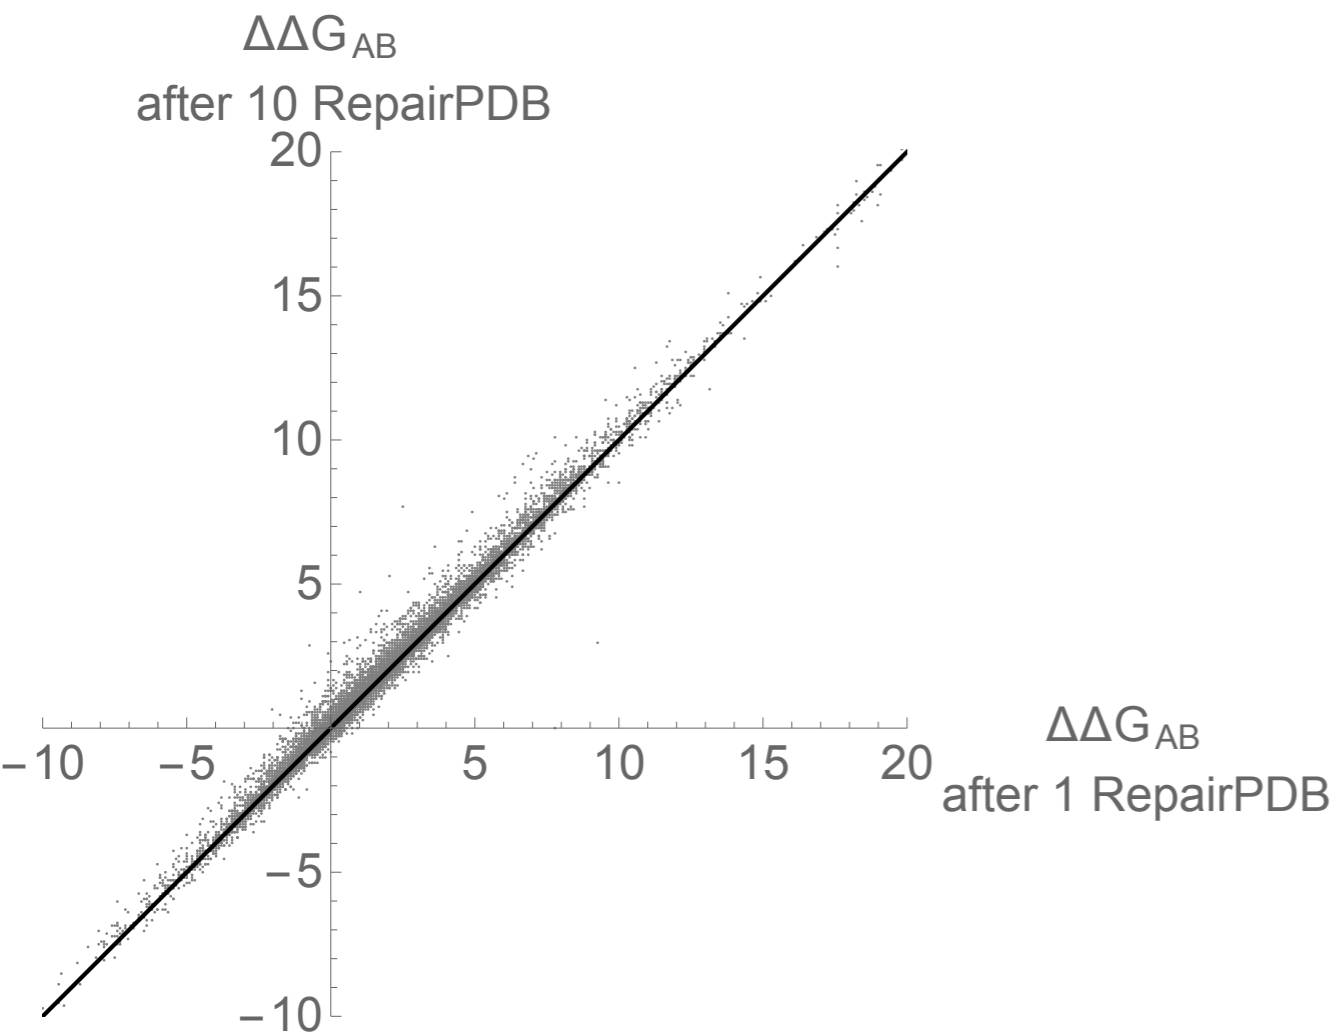**b**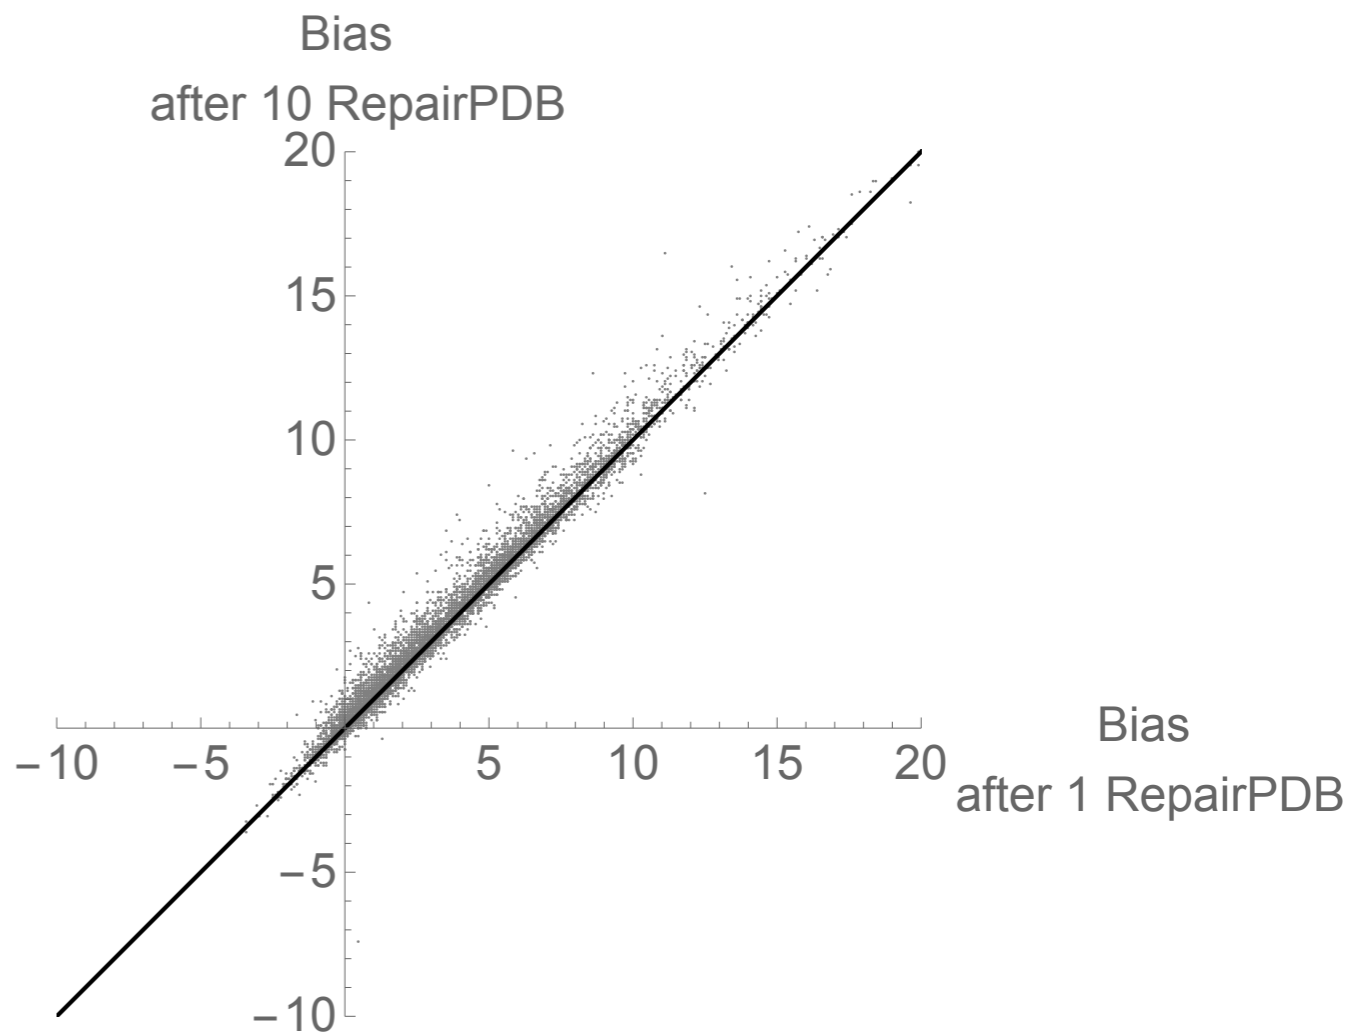

Supplement: bty340_figure_s5.pdf [file bty340_figure_s5.pdf]
